# Supplementary material for: Pd-catalyzed oxidative C–H arylation of heterocycle embedded thiophene/furan with aryl boronic acid/ester
Source: Royal Society of Chemistry journal article supplement (doi:10.1039/c4ra06055e), 2014-09-19
Supplement: c4ra06055e1.pdf [file c4ra06055e1.pdf]

**Pd-catalyzed oxidative C-H arylation of heterocycle embedded  
thiophene/furan with aryl boronic acid/ester**

**R. Srinivasan, R. Senthil Kumaran and N. S. Nagarajan\***

**Table 1:** Optimization of reaction condition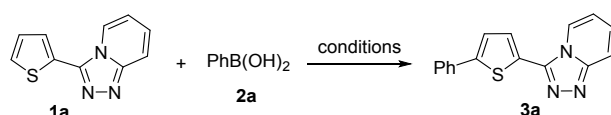

| Entry | Pd cat.<br>(10 mol %)             | Oxidant<br>(2 eq)               | Ligand/cooxidant<br>(10 mol %) | Solvent       | Temp (°C) | Yield of <b>3a</b><br>(%) <sup>a</sup> |
|-------|-----------------------------------|---------------------------------|--------------------------------|---------------|-----------|----------------------------------------|
| 1     | Pd(OAc) <sub>2</sub>              | TEMPO                           | 2,2'-bipyridyl                 | DMSO          | 110       | 10                                     |
| 2     | Pd(OAc) <sub>2</sub>              | TEMPO                           | 2,2'-bipyridyl                 | DMF           | 110       | 5                                      |
| 3     | Pd(OAc) <sub>2</sub>              | Ag <sub>2</sub> CO <sub>3</sub> | -                              | DMF           | 120       | -                                      |
| 4     | Pd(OAc) <sub>2</sub>              | Ag <sub>2</sub> CO <sub>3</sub> | 1,10-phen                      | DMF           | 110       | 10                                     |
| 5     | Pd(OAc) <sub>2</sub>              | Ag <sub>2</sub> CO <sub>3</sub> | 1,10-phen                      | DMSO          | 110       | 70                                     |
| 6     | PdCl <sub>2</sub> (dppf)          | Ag <sub>2</sub> CO <sub>3</sub> | 1,10-phen                      | DMSO          | 110       | -                                      |
| 7     | Pd(OAc) <sub>2</sub>              | Ag <sub>2</sub> CO <sub>3</sub> | 1,10-phen                      | AcOH          | 100       | -                                      |
| 8     | Pd(OAc) <sub>2</sub>              | Ag <sub>2</sub> CO <sub>3</sub> | Cu(OAc) <sub>2</sub>           | DMSO/t-BuOH   | 110       | -                                      |
| 9     | Pd(OAc) <sub>2</sub>              | Ag <sub>2</sub> CO <sub>3</sub> | Cu(OAc) <sub>2</sub>           | DMSO/t-BuCOOH | 110       | -                                      |
| 10    | Pd(OAc) <sub>2</sub>              | Ag <sub>2</sub> O               | 1,10-phen                      | DMSO          | 110       | -                                      |
| 11    | Pd(OAc) <sub>2</sub>              | AgOTf                           | Cu(OTf) <sub>2</sub>           | DMSO          | 110       | -                                      |
| 12    | Pd(OAc) <sub>2</sub><br>(5 mol %) | Ag <sub>2</sub> CO <sub>3</sub> | 1,10-phen                      | DMSO          | 110       | 71                                     |
| 13    | Pd(OAc) <sub>2</sub><br>(5 mol %) | O <sub>2</sub>                  | 1,10-phen                      | DMSO          | 110       | traces                                 |

Treating of 3-(thiophen-2-yl)-[1,2,4]triazolo[4,3-*a*]pyridine **1a** with phenyl boronic acid **2a** under previously reported conditions gave the arylated product **3a** (Table 1) only in trace amounts.<sup>11</sup> Repeated attempts by changing the solvents did not show any improvement in the yield. Further, **1a** and **2a** under 10 mol% of Pd(OAc)<sub>2</sub> and silver carbonate in DMF at 120 °C for 24 h gave no arylated product. Meanwhile, addition of 10 mol% of 1,10-phenanthroline to the same reaction mixture showed minor amount of arylated product. Increase in the yield was observed during the trial with DMSO (70%). Changing the silver salt and copper salt gave disappointing results. Reduction in the amount of catalyst to 5 mol% of Pd(OAc)<sub>2</sub> gave the arylated product **3a** without much compromising the yield (entry 12). Under the optimized condition, molecular oxygen was used as an oxidant instead of Ag<sub>2</sub>CO<sub>3</sub> but traces of **3a** formation was observed, major **1a** remained in the mixture (entry 13). The spectral data of purified arylated product was indeed proved to be C5-arylation **3a** and thus the outcome is 2,5-disubstituted thiophene derivative.

## 1. Experimental methods

### 1.1. General methods

All the reagents were purchased commercially and used without further purification. Solvents were used without drying.  $^1\text{H}$  and  $^{13}\text{C}$  NMR spectra were recorded on 300 or 400 MHz Bruker spectrometers in  $\text{CDCl}_3$  /  $\text{DMSO-d}_6$ . The chemical shifts were reported in  $\delta$  ppm relative to TMS. IR spectra were recorded on Nicolet 6700 instrument using a universal ATR sampling unit. UPLC was recorded on Acquity ultra performance LC instrument. Melting point was measured in BÜCKI - B545 instrument.

### 1.2. Typical experimental procedure:

**3-(5-Phenylthiophen-2-yl)-[1,2,4]triazolo[4,3-a]pyridine (3a):** 3-(Thiophen-2-yl)-[1,2,4]triazolo[4,3-a]pyridine (0.2 g, 1 mmol), phenylboronic acid (2 mmol), silvercarbonate (2 mmol) and 1, 10-phenanthroline (0.1 mmol) were taken in dry DMSO (5 mL). The mixture was bubbled with nitrogen for 10 mins. Then  $\text{Pd}(\text{OAc})_2$  (0.05 mmol) was added to the mixture and heated to 110 °C for 24 h. The mixture was filtered through the celite pad and washed with DCM (20 mL). The organic layer was washed with water (2 x 20 mL), brine (20 mL) and dried over sodium sulphate. The organic layer was concentrated under reduced pressure to give a residue which was purified by silica gel column chromatography using 20% EtOAc in DCM to afford 0.19 g (70 %) of **3a** as a yellow solid. A similar procedure was followed for arylation of all other examples (Tables 2- 4).

## 2. Characterization of all the compounds.

### 3-(5-Phenylthiophen-2-yl)-[1,2,4]triazolo[4,3-a]pyridine (3a)

mp 205-207 °C. IR (neat) 2920, 2851, 2361, 1969, 1629, 1490, 1070, 903, 747, 684  $\text{cm}^{-1}$ .  $^1\text{H}$  NMR (400 MHz,  $\text{DMSO-d}_6$ ):  $\delta$  8.82 (d,  $J = 7.04$  Hz, 1H), 7.95 (d,  $J = 3.92$  Hz, 1H), 7.90 (d,  $J = 9.28$  Hz, 1H), 7.80 (d,  $J = 7.88$  Hz, 1H), 7.55 (d,  $J = 3.88$  Hz, 1H), 7.51-7.47 (m, 3H), 7.39 (t,  $J = 7.20$  Hz, 1H), 7.14 (t,  $J = 6.76$  Hz, 1H);  $^{13}\text{C}$  NMR (75 MHz,  $\text{CDCl}_3$ ): 150.5, 145.4, 141.7, 133.3, 129.7, 128.9, 128.6, 128.1, 127.2, 126.1, 125.2, 125.0, 116.2, 115.4. UPLC: (M + H) $^+$  278.2. Anal. Calcd. For  $\text{C}_{16}\text{H}_{11}\text{N}_3\text{S}$ : C, 69.29; H, 4.00; N, 15.15. Found: C, 69.47; H, 4.32; N, 15.42.

### 3-(5-*p*-Tolylthiophen-2-yl)-[1,2,4]triazolo[4,3-a]pyridine (3b)

mp 248-250 °C. IR (neat) 3435, 2924, 1634, 1497, 1485, 1069, 804, 749  $\text{cm}^{-1}$ .  $^1\text{H}$  NMR (400 MHz,  $\text{CDCl}_3$ ):  $\delta$  8.47 (d,  $J = 7.20$  Hz, 1H), 7.88 (d,  $J = 9.20$  Hz, 1H), 7.64 (d,  $J = 3.60$  Hz, 1H), 7.58 (d,  $J = 8.00$  Hz, 2H), 7.40 (d,  $J = 3.60$  Hz, 1H), 7.34 (t,  $J = 7.20$  Hz, 1H), 7.26 (d,  $J = 8.00$  Hz, 2H), 6.98 (t,  $J = 6.80$  Hz, 1H), 2.41 (s, 3H);  $^{13}\text{C}$  NMR (100 MHz,  $\text{DMSO-d}_6$ ):  $\delta$  150.5, 145.7, 138.5, 130.6, 130.3, 128.6, 128.1, 126.6, 125.0, 124.7,

116.2, 115.4, 21.3. UPLC: (M + H)<sup>+</sup> 292.5. Anal. Calcd. For C<sub>17</sub>H<sub>13</sub>N<sub>3</sub>S: C, 70.08; H, 4.50; N, 14.42. Found: C, 70.18; H, 4.45; N, 14.52.

**3-(5-(3,5-Dimethylphenyl)thiophen-2-yl)-[1,2,4]triazolo[4,3-a]pyridine (3c)**

mp 153-155 °C. IR (neat) 3436, 3083, 2920, 1633, 1599, 1498, 1377, 1069, 1006, 911, 839, 818, 753 cm<sup>-1</sup>. <sup>1</sup>H NMR (400 MHz, DMSO-d<sub>6</sub>): δ 8.80 (d, *J* = 7.04 Hz, 1H), 7.91-7.88 (m, 2H), 7.68 (d, *J* = 3.92 Hz, 1H), 7.49-7.45 (m, 1H), 7.40 (s, 2H), 7.13 (td, *J* = 6.72, 0.96 Hz, 1H), 7.01 (s, 1H), 2.33 (s, 6H); <sup>13</sup>C NMR (100 MHz, DMSO-d<sub>6</sub>): δ 150.5, 145.8, 141.8, 138.9, 133.2, 130.4, 128.5, 128.1, 126.9, 125.0, 124.9, 123.9, 116.2, 115.4, 21.3. UPLC: (M + H)<sup>+</sup> 306.5. Anal. Calcd. For C<sub>18</sub>H<sub>15</sub>N<sub>3</sub>S: C, 70.79; H, 4.95; N, 13.76. Found: C, 70.56; H, 5.00; N, 13.50.

**3-(5-Mesitylthiophen-2-yl)-[1,2,4]triazolo[4,3-a]pyridine (3d)**

mp 139-137 °C. IR (neat) 3435, 3114, 2923, 2853, 1743, 1634, 1612, 1497, 1076, 1061, 841, 812, 745, 733 cm<sup>-1</sup>. <sup>1</sup>H NMR (400 MHz, CDCl<sub>3</sub>): δ 8.47 (d, *J* = 6.80 Hz, 1H), 7.87 (d, *J* = 9.20 Hz, 1H), 7.69 (d, *J* = 3.60 Hz, 1H), 7.36-7.31 (m, 1H), 6.99 (s, 2H), 6.97 (d, *J* = 3.20 Hz, 1H), 2.36 (s, 3H), 2.21 (s, 6H); <sup>13</sup>C NMR (100 MHz, DMSO-d<sub>6</sub>): δ 150.4, 143.3, 141.7, 138.3, 137.7, 129.8, 128.6, 128.6, 128.5, 128.1, 127.3, 124.9, 116.2, 115.4, 21.1, 20.9. UPLC: (M + H)<sup>+</sup> 320.3. Anal. Calcd. For C<sub>19</sub>H<sub>17</sub>N<sub>3</sub>S: C, 71.44; H, 5.36; N, 13.15. Found: C, 71.55; H, 5.67; N, 13.36.

**3-(5-(4-*tert*-Butylphenyl)thiophen-2-yl)-[1,2,4]triazolo[4,3-a]pyridine (3e)**

mp 204-206 °C. IR (neat) 3107, 2957, 2361, 1632, 1572, 1450, 1378, 1264, 1114, 1069, 963, 906, 795, 757 cm<sup>-1</sup>. <sup>1</sup>H NMR (400 MHz, CDCl<sub>3</sub>): δ 8.47 (d, *J* = 7.04 Hz, 1H), 7.88 (d, *J* = 9.28 Hz, 1H), 7.64-7.61 (m, 3H), 7.47 (d, *J* = 8.60 Hz, 2H), 7.41 (d, *J* = 3.88 Hz, 1H), 7.36-7.32 (m, 1H), 7.00 (td, *J* = 6.86, 0.84 Hz, 1H), 1.37 (s, 9H); <sup>13</sup>C NMR (100 MHz, CDCl<sub>3</sub>): δ 151.8, 147.2, 130.6, 127.8, 127.1, 126.1, 125.9 (3C), 125.8 (2C), 123.3, 123.0, 116.9, 114.6, 34.7, 31.2. UPLC: (M + H)<sup>+</sup> 334.7. Anal. Calcd. For C<sub>20</sub>H<sub>19</sub>N<sub>3</sub>S: C, 72.04; H, 5.74; N, 12.60. Found: C, 71.90; H, 5.87; N, 12.41.

**3-(5-(4-Methoxyphenyl)thiophen-2-yl)-[1,2,4]triazolo[4,3-a]pyridine (3f)**

mp 188-192 °C. IR (neat) 1602, 1563, 1480, 1250, 1176, 1064, 1025, 811, 732, 686 cm<sup>-1</sup>. <sup>1</sup>H NMR (400 MHz, DMSO-d<sub>6</sub>): δ 8.78 (d, *J* = 7.20 Hz, 1H), 7.87 (m, 2H), 7.71 (d, *J* = 8.88 Hz, 2H), 7.59 (d, *J* = 3.60 Hz, 1H), 7.48-7.44 (m, 1H), 7.13 (td, *J* = 6.80, 0.80 Hz, 1H), 7.03 (d, *J* = 8.88 Hz, 2H), 3.80 (s, 3H); <sup>13</sup>C NMR (75 MHz, DMSO-d<sub>6</sub>): δ 159.9, 150.5, 145.6, 141.8, 128.5, 128.1, 127.5, 126.0, 124.9, 124.0, 116.2, 115.4, 115.1, 55.8. UPLC: (M + H)<sup>+</sup> 308.2. Anal. Calcd. For: C<sub>17</sub>H<sub>13</sub>N<sub>3</sub>OS: C, 66.43; H, 4.26; N, 13.67. Found: C, 66.54; H, 4.06; N, 13.76.

**3-(5-(3-Methoxyphenyl)thiophen-2-yl)-[1,2,4]triazolo[4,3-a]pyridine (3g)**

mp 172-174 °C. IR (neat) 1600, 1572, 1471, 1281, 1222, 1163, 1045, 853, 807, 765, 728, 683 cm<sup>-1</sup>. <sup>1</sup>H NMR (400 MHz, DMSO-d<sub>6</sub>): δ 8.80 (d, *J* = 7.20 Hz, 1H), 7.92 (d, *J* = 4.00 Hz, 1H), 7.88 (d, *J* = 9.20 Hz, 1H), 7.75 (d, *J* = 4.00 Hz, 1H), 7.49-7.45 (m, 1H), 7.40-7.31 (m, 3H), 7.12 (td, *J* = 6.80, 0.80 Hz, 1H), 6.95 (dt, *J* = 6.80, 1.2 Hz, 1H), 3.83 (s, 3H); <sup>13</sup>C NMR (75 MHz, DMSO-d<sub>6</sub>): δ 160.3, 150.5, 145.3, 141.7, 134.6, 130.9, 128.6, 128.0, 127.3, 125.6, 125.0, 118.6, 116.2, 115.4, 114.5, 111.4, 55.7. UPLC: (M + H)<sup>+</sup> 308.2. Anal. Calcd. For: C<sub>17</sub>H<sub>13</sub>N<sub>3</sub>OS: C, 66.43; H, 4.26; N, 13.67. Found: C, 66.67; H, 4.34; N, 13.72.

**3-(5-(3-Ethoxyphenyl)thiophen-2-yl)-[1,2,4]triazolo[4,3-a]pyridine (3h)**

mp 177-179 °C. IR (neat) 3433, 2925, 1603, 1576, 1286, 1273, 1192, 1177, 1069, 1051, 812, 771, 748, 732 cm<sup>-1</sup>. <sup>1</sup>H NMR (300 MHz, CDCl<sub>3</sub>): δ 8.45 (d, *J* = 6.96 Hz, 1H), 7.86 (d, *J* = 9.27 Hz, 1H), 7.63 (d, *J* = 3.84 Hz, 1H), 7.42 (d, *J* = 3.84 Hz, 1H), 7.36-7.29 (m, 2H), 7.20 (d, *J* = 1.83 Hz, 1H), 6.97 (t, *J* = 6.81 Hz, 1H), 6.90 (dd, *J* = 8.07, 1.38 Hz, 1H), 4.10 (q, *J* = 6.99 Hz, 2H), 1.46 (t, *J* = 6.99 Hz, 3H); <sup>13</sup>C NMR (100 MHz, DMSO-d<sub>6</sub>): δ 159.6, 150.5, 145.3, 134.6, 130.9, 128.6, 128.1, 127.7, 127.2, 125.5, 125.0, 118.5, 116.2, 115.4, 114.9, 114.7, 112.0, 63.7, 15.1. UPLC: (M + H)<sup>+</sup> 322.5. Anal. Calcd. For: C<sub>18</sub>H<sub>15</sub>N<sub>3</sub>OS: C, 67.27; H, 4.70; N, 13.07. Found: C, 66.50; H, 4.72; N, 13.13.

**3-(5-(2-(Methylthio)phenyl)thiophen-2-yl)-[1,2,4]triazolo[4,3-a]pyridine (3i)**

mp 140-142 °C. IR (neat) 3103, 2917, 2854, 1563, 1494, 1410, 1376, 1276, 1056, 1002, 963, 794 cm<sup>-1</sup>. <sup>1</sup>H NMR (400 MHz, CDCl<sub>3</sub>): δ 8.50 (d, *J* = 6.80 Hz, 1H), 7.89 (d, *J* = 9.20 Hz, 1H), 7.68 (d, *J* = 3.60 Hz, 1H), 7.49 (dd, *J* = 7.60, 1.60 Hz, 1H), 7.41 (d, *J* = 4.00 Hz, 1H), 7.41-7.32 (m, 3H), 7.27-7.23 (m, 1H), 6.99 (t, *J* = 6.80 Hz, 1H), 2.49 (s, 3H); <sup>13</sup>C NMR (100 MHz, CDCl<sub>3</sub>): δ 144.2, 138.0, 132.0, 130.8, 129.0, 128.3, 127.4, 127.1, 126.2, 125.1, 123.0, 116.8, 114.7, 16.3. UPLC: (M + H)<sup>+</sup> 324.6.

**3-(5-(3-(Methylthio)phenyl)thiophen-2-yl)-[1,2,4]triazolo[4,3-a]pyridine (3j)**

mp 150-152 °C. IR (neat) 3112, 2915, 1632, 1587, 1561, 1495, 1478, 1068, 800, 770, 746, 691, 671 cm<sup>-1</sup>. <sup>1</sup>H NMR (400 MHz, CDCl<sub>3</sub>): δ 8.45 (d, *J* = 6.80 Hz, 1H), 7.84 (d, *J* = 9.20 Hz, 1H), 7.62 (d, *J* = 3.60 Hz, 1H), 7.52 (s, 1H), 7.43-7.41 (m, 2H), 7.36-7.29 (m, 2H), 7.23 (d, *J* = 7.60 Hz, 1H), 7.00 (t, *J* = 6.80 Hz, 1H), 2.55 (s, 3H); <sup>13</sup>C NMR (75 MHz, CDCl<sub>3</sub>): δ 146.1, 139.7, 133.8, 129.4, 127.6, 127.1, 126.7, 126.2, 124.0, 123.8, 122.8, 122.7, 116.8, 114.6, 15.7. UPLC: (M + H)<sup>+</sup> 324.2. Anal. Calcd. For: C<sub>17</sub>H<sub>13</sub>N<sub>3</sub>S<sub>2</sub>: C, 63.13; H, 4.05; N, 12.99. Found: C, 63.40; H, 4.50; N, 13.12.

**3-(5-(Biphenyl-3-yl)thiophen-2-yl)-[1,2,4]triazolo[4,3-a]pyridine (3k)**

mp 162-164 °C. IR (neat) 2928, 2856, 2361, 1730, 1593, 1495, 1471, 1378, 1275, 1070, 794, 690 cm<sup>-1</sup>. **<sup>1</sup>H NMR (400 MHz, CDCl<sub>3</sub>):** δ 8.50 (d, *J* = 7.20 Hz, 1H), 7.91-7.89 (m, 2H), 7.70-7.66 (m, 4H), 7.58 (d, *J* = 7.60 Hz, 1H), 7.55-7.49 (m, 4H), 7.44-7.40 (m, 1H), 7.35 (t, *J* = 7.60 Hz, 1H), 7.00 (t, *J* = 6.80 Hz, 1H); **<sup>13</sup>C NMR (75 MHz, DMSO-*d*<sub>6</sub>):** δ 146.9, 142.3, 140.5, 133.8, 129.6, 128.9, 128.0, 127.7, 127.4, 127.3, 127.2, 126.4, 124.9, 124.0, 123.0, 116.9, 114.8. UPLC: (M + H)<sup>+</sup> 354.7. Anal. Calcd. For: C<sub>22</sub>H<sub>15</sub>N<sub>3</sub>S: C, 74.76; H, 4.28; N, 11.89. Found: C, 74.36; H, 4.48; N, 12.00.

### **3-(5-(Naphthalen-2-yl)thiophen-2-yl)-[1,2,4]triazolo[4,3-a]pyridine (3I)**

mp 214-216 °C. IR (neat) 3109, 2917, 1630, 1495, 1378, 1065, 814, 745 cm<sup>-1</sup>. **<sup>1</sup>H NMR (400 MHz, CDCl<sub>3</sub>):** δ 8.52 (d, *J* = 6.80 Hz, 1H), 8.14 (s, 1H), 7.92-7.86 (m, 4H), 7.80 (d, *J* = 8.52 Hz, 1H), 7.71 (d, *J* = 3.68 Hz, 1H), 7.58 (d, *J* = 3.64 Hz, 1H), 7.55-7.50 (m, 2H), 7.37 (t, *J* = 7.40 Hz, 1H), 7.02 (t, *J* = 6.68 Hz, 1H); **<sup>13</sup>C NMR (100 MHz, DMSO-*d*<sub>6</sub>):** δ 150.6, 145.4, 141.7, 133.7, 133.1, 130.8, 129.3, 128.6, 128.2, 128.1, 127.5, 127.4, 127.0, 125.8, 125.0, 124.5, 124.3, 116.2, 115.5. UPLC: (M + H)<sup>+</sup> 328.3. Anal. Calcd. For: C<sub>20</sub>H<sub>13</sub>N<sub>3</sub>S: C, 73.37; H, 4.00; N, 12.83. Found: C, 73.56; H, 3.98; N, 12.56.

### **3-(5-Phenylfuran-2-yl)-[1,2,4]triazolo[4,3-a]pyridine (4a)**

mp 135-137 °C. IR (neat) 3130, 3056, 2921, 1630, 1490, 1450, 1074, 1015, 797, 752, 687 cm<sup>-1</sup>. **<sup>1</sup>H NMR (400 MHz, DMSO-*d*<sub>6</sub>):** δ 8.89 (d, *J* = 6.92 Hz, 1H), 7.92-7.90 (m, 3H), 7.52-7.47 (m, 3H), 7.43 (d, *J* = 2.16 Hz, 1H), 7.38 (t, *J* = 7.72 Hz, 1H), 7.30 (d, *J* = 3.32 Hz, 1H), 7.18 (t, *J* = 6.60 Hz, 1H); **<sup>13</sup>C NMR (100 MHz, CDCl<sub>3</sub>):** 155.2, 142.1, 129.8, 129.0, 128.4, 127.4, 124.0, 116.8, 114.7, 113.2, 107.3. UPLC: (M + H)<sup>+</sup> 262.5. Anal. Calcd. For: C<sub>16</sub>H<sub>11</sub>N<sub>3</sub>O: C, 73.55; H, 4.24; N, 16.08. Found: C, 73.70; H, 4.30; N, 16.02.

### **3-(5-(4-*tert*-Butylphenyl)furan-2-yl)-[1,2,4]triazolo[4,3-a]pyridine (4b)**

mp 167-169 °C. IR (neat) 3422, 3134, 2961, 1636, 1495, 1270, 1068, 1027, 834, 787, 749, 736 cm<sup>-1</sup>. **<sup>1</sup>H NMR (400 MHz, CDCl<sub>3</sub>):** δ 8.85 (d, *J* = 7.04 Hz, 1H), 7.86 (d, *J* = 9.28 Hz, 1H), 7.71 (d, *J* = 8.40 Hz, 2H), 7.51 (d, *J* = 8.40 Hz, 2H), 7.36 (d, *J* = 3.52 Hz, 1H), 7.34-7.32 (m, 1H), 7.00 (t, *J* = 6.80 Hz, 1H), 6.86 (d, *J* = 3.56 Hz, 1H), 1.38 (s, 9H); **<sup>13</sup>C NMR (75 MHz, CDCl<sub>3</sub>):** δ 155.3, 151.6, 141.8, 127.2, 127.1, 125.9, 124.0, 123.8, 116.7, 114.6, 113.2, 106.7, 34.7, 31.2. UPLC: (M + H)<sup>+</sup> 318.3. Anal. Calcd. For: C<sub>20</sub>H<sub>19</sub>N<sub>3</sub>O: C, 75.69; H, 6.03; N, 13.24. Found: C, 76.00; H, 5.98; N, 13.41.

### **3-(5-Mesitylfuran-2-yl)-[1,2,4]triazolo[4,3-a]pyridine (4c)**

mp 140-142 °C. IR (neat) 3142, 2922, 1656, 1610, 1573, 1374, 1180, 1130, 1033, 1016, 757 cm<sup>-1</sup>. **<sup>1</sup>H NMR (400 MHz, CDCl<sub>3</sub>):** δ 8.72 (d, *J* = 7.12 Hz, 1H), 7.83 (d, *J* = 9.31 Hz, 1H), 7.43 (d, *J* = 3.44 Hz, 1H), 7.31-7.27 (m, 1H), 7.02 (s, 2H), 6.90-6.86 (m, 1H), 6.54 (d, *J* = 3.44 Hz, 1H), 2.38 (s, 3H), 2.27 (s, 6H); **<sup>13</sup>C NMR (75**

**MHz, CDCl<sub>3</sub>):**  $\delta$  153.7, 149.8, 142.0, 139.7, 139.3, 138.5, 128.4, 127.1, 127.0, 124.3, 116.5, 114.3, 112.0, 111.7, 21.1, 20.5. UPLC: (M + H)<sup>+</sup> 304.3. Anal. Calcd. For: C<sub>20</sub>H<sub>19</sub>N<sub>3</sub>O: C, 75.23; H, 5.65; N, 13.85. Found: C, 75.37; H, 5.29; N, 13.54.

**3-(5-(3-Methoxyphenyl)furan-2-yl)-[1,2,4]triazolo[4,3-a]pyridine (4d)**

mp 128-130 °C. IR (neat) 1583, 1488, 1378, 1290, 1222, 1079, 1042, 1034, 796, 776, 753 cm<sup>-1</sup>. **<sup>1</sup>H NMR (400 MHz, CDCl<sub>3</sub>):**  $\delta$  8.83 (d, *J* = 6.80 Hz, 1H), 7.86 (d, *J* = 9.20 Hz, 1H), 7.42-7.33 (m, 4H), 7.29-7.28 (m, 1H), 7.01 (t, *J* = 6.80 Hz, 1H), 6.93-6.90 (m, 2H), 3.91 (s, 3H); **<sup>13</sup>C NMR (100 MHz, CDCl<sub>3</sub>):**  $\delta$  160.0, 155.0, 142.2, 131.1, 130.1, 127.4, 124.0, 116.7, 116.6, 114.8, 113.5, 113.2, 110.0, 107.7, 55.4. UPLC: (M + H)<sup>+</sup> 292.2. Anal. Calcd. For: C<sub>17</sub>H<sub>13</sub>N<sub>3</sub>O<sub>2</sub>: C, 70.09; H, 4.50; N, 14.42. Found: C, 70.22; H, 4.45; N, 14.53.

**3-(5-(4-Methoxyphenyl)furan-2-yl)-[1,2,4]triazolo[4,3-a]pyridine (4e)**

mp 168-170 °C. IR (neat) 2933, 2362, 1549, 1255, 1009, 813, 794 cm<sup>-1</sup>. **<sup>1</sup>H NMR (400 MHz, CDCl<sub>3</sub>):**  $\delta$  8.81 (d, *J* = 7.04 Hz, 1H), 7.86 (d, *J* = 9.24 Hz, 1H), 7.70 (dd, *J* = 6.86, 1.96 Hz, 2H), 7.36-7.32 (m, 2H), 7.02-6.99 (m, 3H), 6.77 (d, *J* = 3.56 Hz, 1H), 3.88 (s, 3H); **<sup>13</sup>C NMR (100 MHz, CDCl<sub>3</sub>):**  $\delta$  159.8, 155.4, 141.4, 127.4, 125.6, 124.0, 12.8, 116.7, 114.7, 114.5, 113.4, 105.8, 55.4. UPLC: (M + H)<sup>+</sup> 292.6. Anal. Calcd. For: C<sub>17</sub>H<sub>13</sub>N<sub>3</sub>O<sub>2</sub>: C, 70.09; H, 4.50; N, 14.42. Found: C, 70.12; H, 4.54; N, 14.34.

**3-(5-(3-(Methylthio)phenyl)furan-2-yl)-[1,2,4]triazolo[4,3-a]pyridine (4f)**

Low melting solid. IR (neat) 2931, 2231, 1689, 1638, 1401, 1265, 1145, 792, 753 cm<sup>-1</sup>. **<sup>1</sup>H NMR (400 MHz, CDCl<sub>3</sub>):**  $\delta$  8.85 (d, *J* = 6.88 Hz, 1H), 7.96-7.94 (m, 1H), 7.64 (s, 1H), 7.54 (d, *J* = 7.72 Hz, 1H), 7.43-7.38 (m, 3H), 7.27-7.25 (m, 1H), 7.08 (t, *J* = 6.80 Hz, 1H), 6.92 (d, *J* = 3.52 Hz, 1H), 2.55 (s, 3H); **<sup>13</sup>C NMR (100 MHz, CDCl<sub>3</sub>):**  $\delta$  154.9, 142.0, 139.7, 130.3, 129.4, 128.1, 126.3, 124.1, 122.1, 120.8, 116.6, 115.2, 113.7, 107.9, 15.8. UPLC: (M + H)<sup>+</sup> 308.2.

**3-(5-(4-*tert*-Butylphenyl)thiophen-2-yl)-[1,2,4]triazolo[3,4-a]isoquinoline (5a)**

mp 285-287 °C. IR (neat) 3430, 2958, 1515, 1483, 1474, 1426, 1385, 1360, 819, 786 cm<sup>-1</sup>. **<sup>1</sup>H NMR (400 MHz, CDCl<sub>3</sub>):**  $\delta$  8.86 (d, *J* = 7.20 Hz, 1H), 8.22 (d, *J* = 7.20 Hz, 1H), 7.81-7.71 (m, 3H), 7.67 (d, *J* = 4.0 Hz, 1H), 7.64 (d, *J* = 6.80 Hz, 2H), 7.49 (dd, *J* = 6.40, 2.00 Hz, 2H), 7.43 (d, *J* = 3.60 Hz, 1H), 7.22 (d, *J* = 7.60 Hz, 1H), 1.37 (s, 9H); **<sup>13</sup>C NMR (100 MHz, CDCl<sub>3</sub>):**  $\delta$  151.7, 149.1, 147.5, 143.7, 130.6, 130.3, 129.7, 129.4, 128.5, 127.1, 126.1, 125.9, 125.7, 124.3, 123.4, 121.6, 119.7, 115.9, 34.7, 31.2. UPLC: (M + H)<sup>+</sup> 384.3.

**3-(5-(3-Methoxyphenyl)thiophen-2-yl)-[1,2,4]triazolo[3,4-a]isoquinoline (5b)**

mp 173-175 °C. IR (neat) 3422, 1601, 1576, 1567, 1521, 1471, 1424, 1289, 1165, 1053, 786, 761, 700 cm<sup>-1</sup>. **<sup>1</sup>H NMR (400 MHz, CDCl<sub>3</sub>):**  $\delta$  8.86 (d, *J* = 7.6 Hz, 1H), 8.22 (d, *J* = 7.2 Hz, 1H), 7.81-7.73 (m, 3H), 7.68 (d, *J* =

3.60 Hz, 1H), 7.46 (d,  $J = 3.60$  Hz, 1H), 7.37 (t,  $J = 7.60$  Hz, 1H), 7.31-7.29 (m, 1H), 7.22 (d,  $J = 7.60$  Hz, 2H), 6.94 (dd,  $J = 2.40, 8.0$  Hz, 1H), 3.90 (s, 3H);  $^{13}\text{C}$  NMR (75 MHz,  $\text{CDCl}_3$ ):  $\delta$  160.0, 147.1, 134.5, 130.2, 130.1, 129.6, 129.3, 128.4, 127.0, 126.2, 124.2, 123.9, 119.5, 118.6, 115.9, 113.9, 111.7, 55.3. UPLC: (M + H)<sup>+</sup> 358.3. Anal. Calcd. For:  $\text{C}_{21}\text{H}_{15}\text{N}_3\text{OS}$ : C, 70.57; H, 4.23; N, 11.76. Found: C, 70.71; H, 4.09; N, 11.45.

### 3-(5-Mesitylthiophen-2-yl)-[1,2,4]triazolo[3,4-a]isoquinoline (5c)

mp 180-184 °C. IR (neat) 2929, 2850, 1720, 1603, 1560, 1518, 1252, 793  $\text{cm}^{-1}$ .  $^1\text{H}$  NMR (400 MHz,  $\text{CDCl}_3$ ):  $\delta$  8.83 (d,  $J = 8.20$  Hz, 1H), 8.21 (d,  $J = 7.40$  Hz, 1H), 7.80-7.72 (m, 3H), 7.71 (d,  $J = 3.60$  Hz, 1H), 7.19 (d,  $J = 7.44$  Hz, 1H), 6.99-6.98 (m, 1H), 2.35 (s, 3H), 2.21 (s, 6H);  $^{13}\text{C}$  NMR (100 MHz,  $\text{CDCl}_3$ ):  $\delta$  149.1, 145.2, 143.8, 138.5, 138.1, 130.2, 129.7, 129.7, 129.3, 128.3, 128.0, 127.6, 127.2, 127.1, 124.3, 121.7, 119.7, 115.8, 21.1, 20.8. UPLC: (M + H)<sup>+</sup> 370.7. Anal. Calcd. For:  $\text{C}_{23}\text{H}_{19}\text{N}_3\text{S}$ : C, 74.77; H, 5.18; N, 11.37. Found: C, 75.03; H, 5.21; N, 11.49.

### 2-(5-Mesitylthiophen-2-yl)pyridine (6a)

IR (neat) 2918, 1582, 1464, 1430, 772  $\text{cm}^{-1}$ .  $^1\text{H}$  NMR (400 MHz,  $\text{CDCl}_3$ ):  $\delta$  8.60-8.58 (m, 2H), 7.74-7.68 (m, 2H), 7.62 (d,  $J = 3.64$  Hz, 1H), 7.18-7.15 (m, 1H), 6.98 (s, 2H), 6.84 (d,  $J = 3.64$  Hz, 1H), 2.35 (s, 3H), 2.21 (s, 6H).  $^{13}\text{C}$  NMR (100 MHz,  $\text{CDCl}_3$ ):  $\delta$  152.7, 149.5, 144.2, 138.1, 138.0, 136.8, 130.9, 128.2, 127.8, 124.9, 121.7, 118.7, 21.1, 20.8. Anal. Calcd. For:  $\text{C}_{17}\text{H}_{13}\text{N}_2\text{S}$ : C, 77.38; H, 6.13; N, 5.01. Found: C, 77.65; H, 5.94; N, 5.20.

### 1-(5-Mesitylthiophen-2-yl)-1H-pyrazole (6b)

IR (neat) 2916, 1565, 1521, 1386, 1043, 922, 791, 744  $\text{cm}^{-1}$ .  $^1\text{H}$  NMR (400 MHz,  $\text{CDCl}_3$ ):  $\delta$  7.85 (d,  $J = 2.40$  Hz, 1H), 7.71 (d,  $J = 2.00$  Hz, 1H), 7.06 (d,  $J = 3.60$  Hz, 1H), 6.98 (s, 2H), 6.66 (d,  $J = 3.60$  Hz, 1H), 6.47 (t,  $J = 2.00$  Hz, 1H), 2.35 (s, 3H), 2.22 (s, 6H). Anal. Calcd. For:  $\text{C}_{17}\text{H}_{13}\text{N}_2\text{S}$ : C, 71.61; H, 6.01; N, 10.44. Found: C, 71.74; H, 6.25; N, 10.56.

### 2-(5-Mesitylthiophen-2-yl)benzo[d]oxazole (6c)

$^1\text{H}$  NMR (400 MHz,  $\text{CDCl}_3$ ):  $\delta$  7.83 (d,  $J = 3.72$  Hz, 1H), 7.66-7.64 (m, 1H), 7.48-7.45 (m, 1H), 7.26-7.23 (m, 2H), 6.88 (s, 2H), 6.81 (d,  $J = 3.68$  Hz, 1H), 2.25 (s, 3H), 2.09 (s, 6H);  $^{13}\text{C}$  NMR (100 MHz,  $\text{CDCl}_3$ ):  $\delta$  159.0, 150.5, 147.3, 142.1, 138.6, 138.0, 130.3, 129.8, 129.4, 128.3, 128.1, 125.0, 124.7, 119.7, 110.4, 21.1, 20.7. Anal. Calcd. For:  $\text{C}_{19}\text{H}_{13}\text{N}_2\text{S}$ : C, 75.20; H, 5.36; N, 4.39. Found: C, 75.5; H, 5.19; N, 4.15.

### 2-(5-Mesitylfuran-2-yl)benzo[d]oxazole (6d)

IR (neat) 2918, 1638, 1564, 1240, 1088, 796, 741  $\text{cm}^{-1}$ .  $^1\text{H}$  NMR (300 MHz,  $\text{CDCl}_3$ ):  $\delta$  7.77-7.73 (m, 1H), 7.57-7.54 (m, 1H), 7.40 (d,  $J = 3.45$  Hz, 1H), 7.80-7.72 (m, 2H), 6.95 (s, 2H), 6.49 (d,  $J = 3.42$  Hz, 1H), 2.33 (s, 3H), 2.24 (s, 6H);  $^{13}\text{C}$  NMR (100 MHz,  $\text{CDCl}_3$ ):  $\delta$  156.5, 155.6, 150.2, 141.8, 141.6, 138.4, 128.4, 126.9,



125.1, 124.8, 120.0, 115.4, 112.0, 110.5, 21.2, 20.5. Anal. Calcd. For: C, 79.19; H, 5.65; N, 4.62. Found: C, 79.42; H, 5.45; N, 4.76.

**2-(5-Mesitylthiophen-2-yl)benzo[d]thiazole (6e)**

IR (neat) 2914, 1440, 1228, 894, 812, 723  $\text{cm}^{-1}$ .  $^1\text{H NMR}$  (400 MHz,  $\text{CDCl}_3$ ):  $\delta$  8.03 (d,  $J = 8.00$  Hz, 1H), 7.87 (d,  $J = 8.00$  Hz, 1H), 7.68 (d,  $J = 3.60$  Hz, 1H), 7.48 (t,  $J = 7.20$  Hz, 1H), 7.38 (t,  $J = 7.20$  Hz, 1H), 6.98 (s, 2H), 6.87 (d,  $J = 3.60$  Hz, 1H), 2.35 (s, 3H), 2.20 (s, 6H);  $^{13}\text{C NMR}$  (75 MHz,  $\text{CDCl}_3$ ):  $\delta$  161.5, 153.6, 146.2, 138.4, 137.9, 136.9, 134.5, 130.0, 128.9, 128.2, 127.8, 126.3, 125.0, 122.8, 121.4, 21.0, 20.6. Anal. Calcd. For: C, 71.60; H, 5.11; N, 4.18. Found: C, 71.30; H, 5.31; N, 4.00.

**2-(5-Mesitylfuran-2-yl)benzo[d]thiazole (6f)**

$^1\text{H NMR}$  (400 MHz,  $\text{CDCl}_3$ ):  $\delta$  8.06 (d,  $J = 8.00$  Hz, 1H), 7.89 (d,  $J = 8.00$  Hz, 1H), 7.50 (t,  $J = 7.20$  Hz, 1H), 7.38 (t,  $J = 7.20$  Hz, 1H), 6.88 (s, 2H), 6.50 (d,  $J = 3.20$  Hz, 1H), 2.35 (s, 3H), 2.29 (s, 6H);  $^{13}\text{C NMR}$  (75 MHz,  $\text{CDCl}_3$ ):  $\delta$  157.9, 155.2, 153.8, 147.8, 139.1, 138.2, 134.2, 128.5, 127.0, 126.3, 124.9, 122.8, 121.5, 112.4, 112.3, 21.1, 20.6. Anal. Calcd. For: C, 75.20; H, 5.36; N, 4.39. Found: C, 75.42; H, 5.16; N, 4.45.

**2-Mesityl-5-(4-methoxyphenyl)thiophene (6g)**

mp 78-80  $^{\circ}\text{C}$ . IR (neat) 2921, 1454, 1243, 1174, 1028, 825, 795  $\text{cm}^{-1}$ .  $^1\text{H NMR}$  (400 MHz,  $\text{CDCl}_3$ ):  $\delta$  7.58 (d,  $J = 8.80$  Hz, 2H), 7.22 (d,  $J = 3.20$  Hz, 1H), 6.97 (s, 2H), 6.94 (d,  $J = 8.80$  Hz, 2H), 6.76 (d,  $J = 3.60$  Hz, 1H), 3.86 (s, 3H), 2.35 (s, 3H), 2.20 (s, 6H).  $^{13}\text{C NMR}$  (100 MHz,  $\text{CDCl}_3$ ):  $\delta$  159.0, 144.0, 140.0, 138.3, 137.9, 131.1, 128.1, 127.5, 126.9, 121.9, 114.3, 55.4, 21.1, 20.8. Anal. Calcd. For: C, 78.88; H, 6.54. Found: C, 77.93; H, 6.33.

**2-mesityl-5-methylfuran (6h)**

IR (neat) 2920, 1569, 1443, 1218, 1046, 1017, 849, 781  $\text{cm}^{-1}$ .  $^1\text{H NMR}$  (400 MHz,  $\text{CDCl}_3$ ):  $\delta$  7.27 (s, 2H), 6.14 (d,  $J = 3.20$  Hz, 1H), 6.08-6.07 (m, 1H), 2.36 (s, 3H), 2.32 (s, 3H), 2.22 (s, 6H).  $^{13}\text{C NMR}$  (100 MHz,  $\text{CDCl}_3$ ):  $\delta$  151.0, 150.4, 138.2, 138.0, 128.5, 128.3, 128.0, 109.8, 106.2, 21.1, 20.6, 13.6. Anal. Calcd. For: C, 83.96; H, 8.05; Found: C, 83.81; H, 8.21.

**3.  $^1\text{H}$  and  $^{13}\text{C}$  NMR spectrum of compounds (3a-3l), (4a-4f), (5a-5c) and (6a-6h).**

1. <sup>1</sup>H and <sup>13</sup>C NMR spectrum of 3-(5-Phenylthiophen-2-yl)-[1,2,4]triazolo[4,3-a]pyridine (3a)

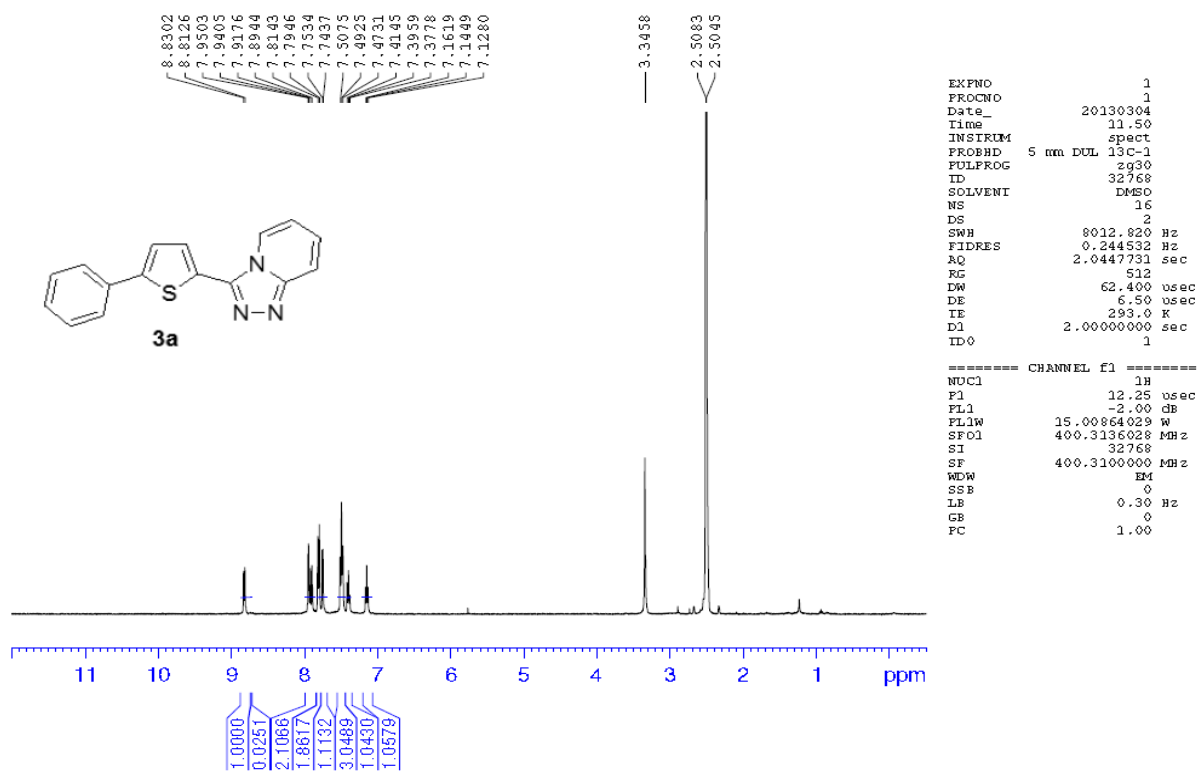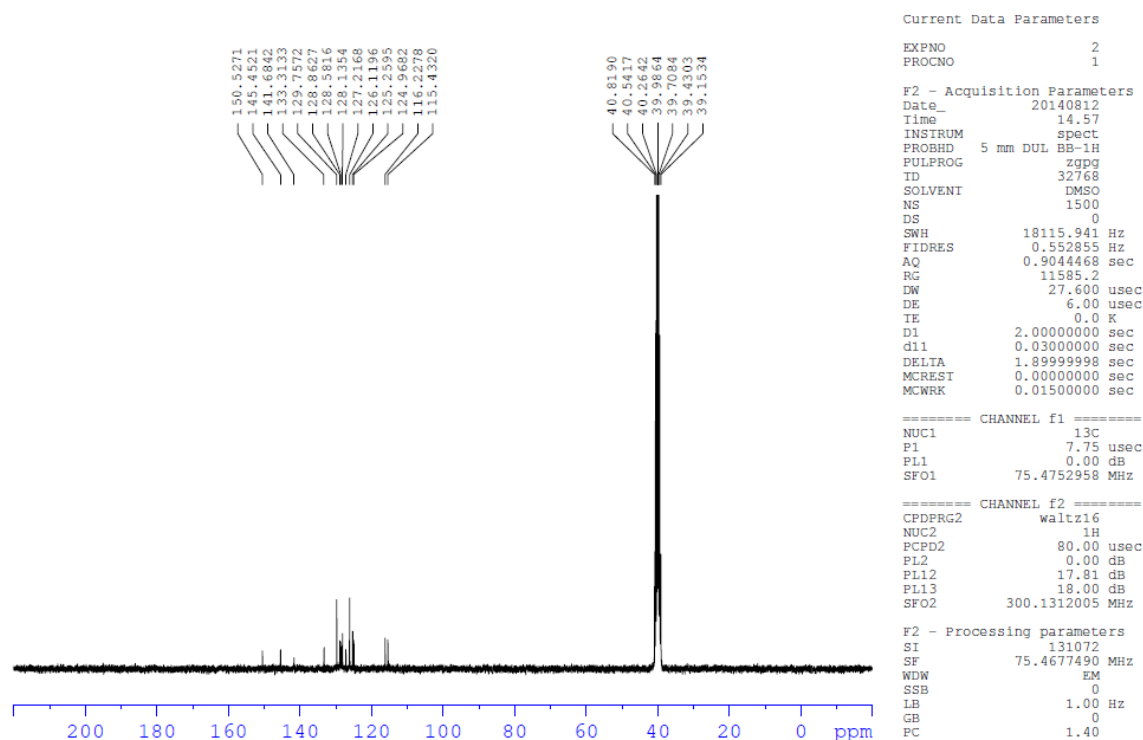

2. <sup>1</sup>H and <sup>13</sup>C NMR spectrum of 3-(5-p-Tolylthiophen-2-yl)-[1,2,4]triazolo[4,3-a]pyridine (3b)

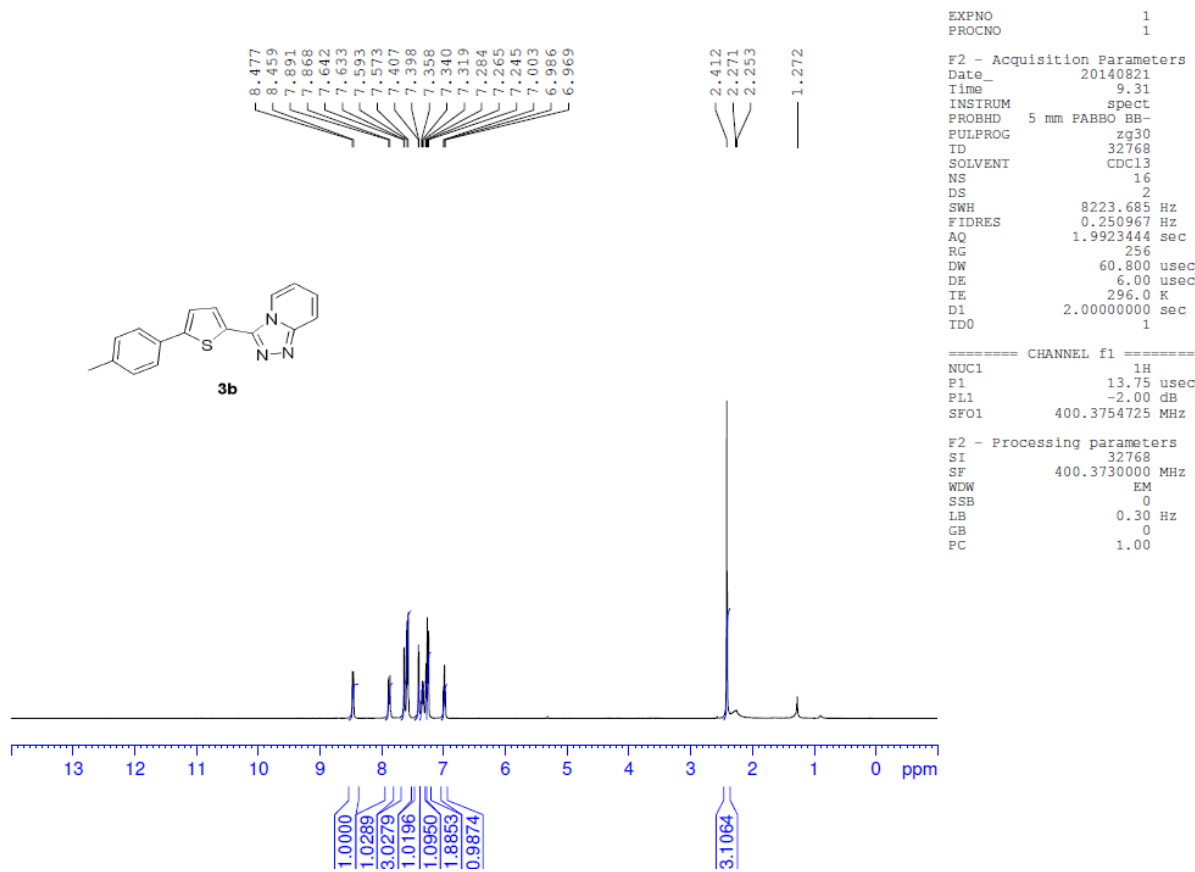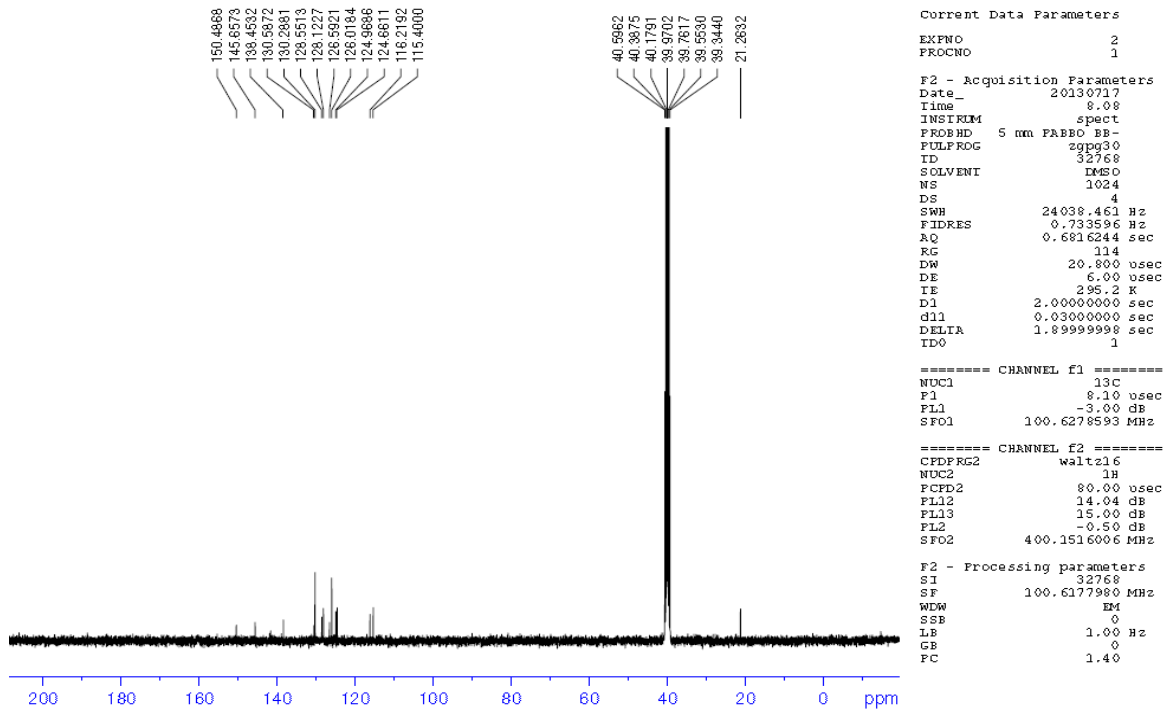

3. <sup>1</sup>H and <sup>13</sup>C NMR spectrum of 3-(5-(3,5-Dimethylphenyl)thiophen-2-yl)-[1,2,4]triazolo[4,3-a]pyridine (3c)

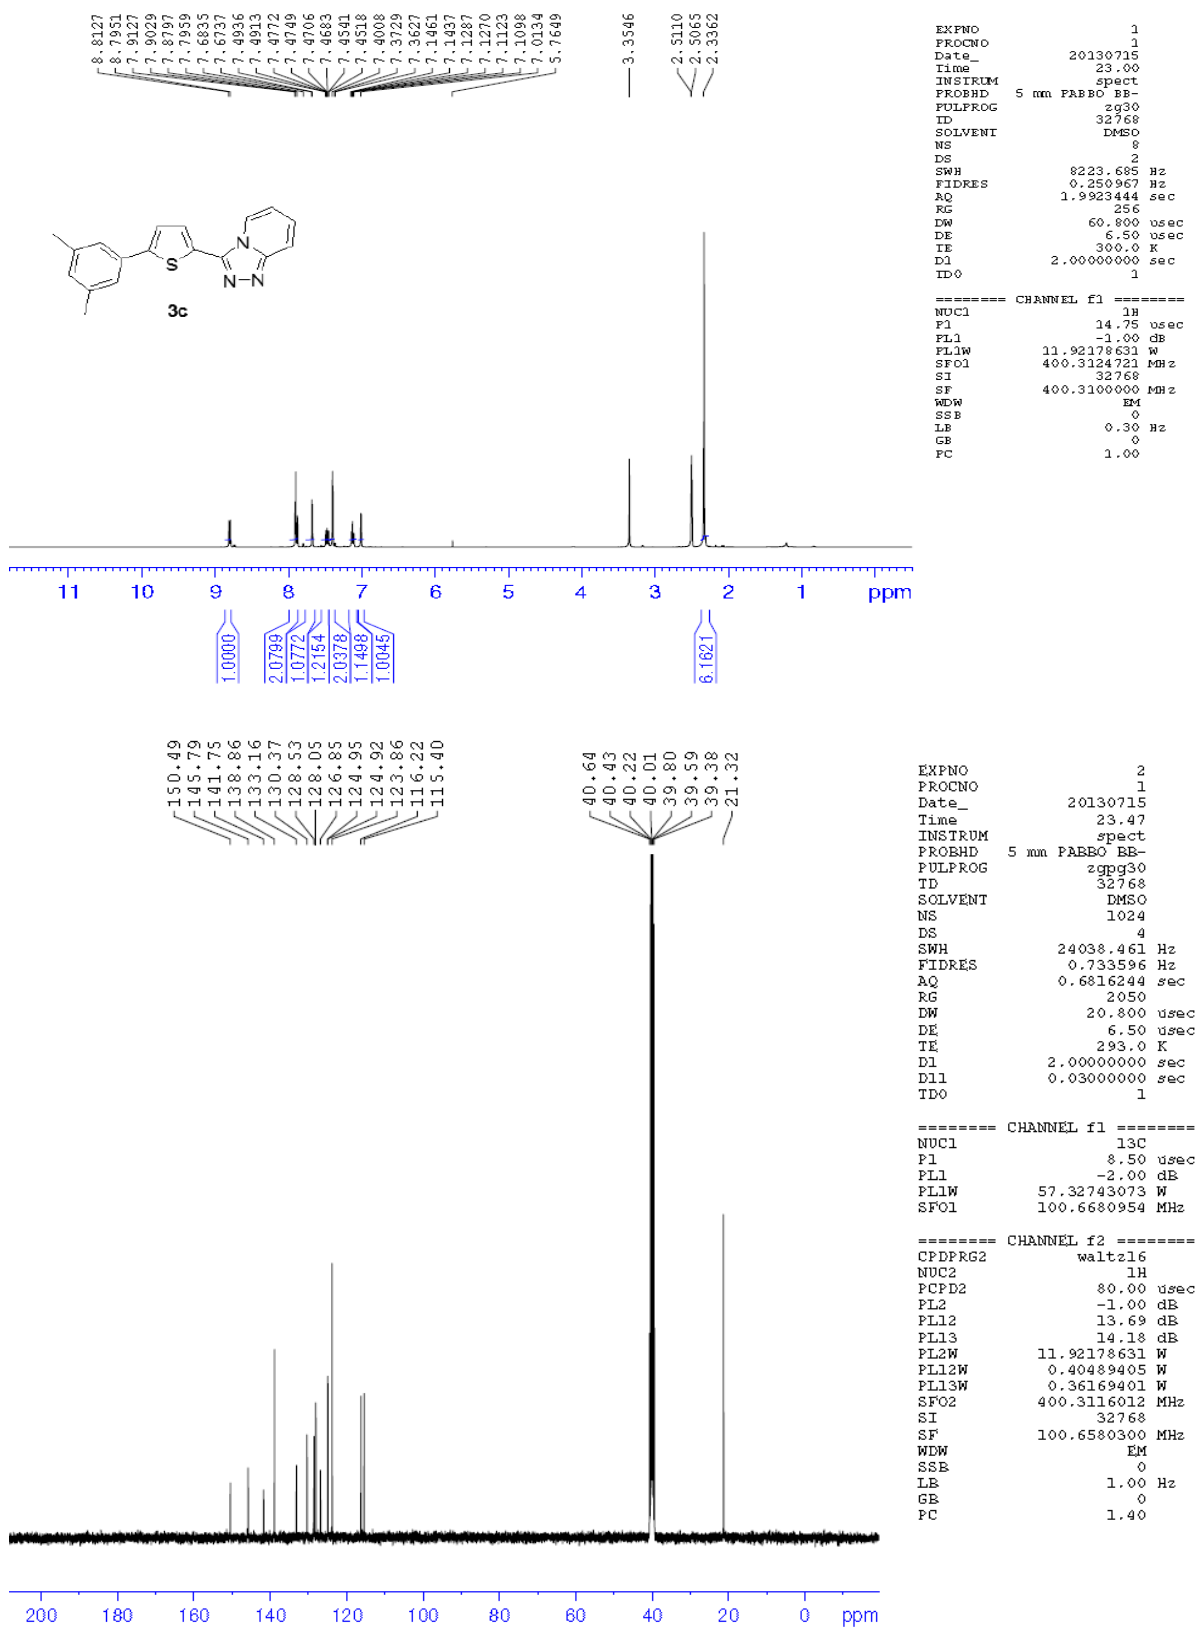

4. <sup>1</sup>H and <sup>13</sup>C NMR spectrum of 3-(5-Mesitylthiophen-2-yl)-[1,2,4]triazolo[4,3-a]pyridine (3d)

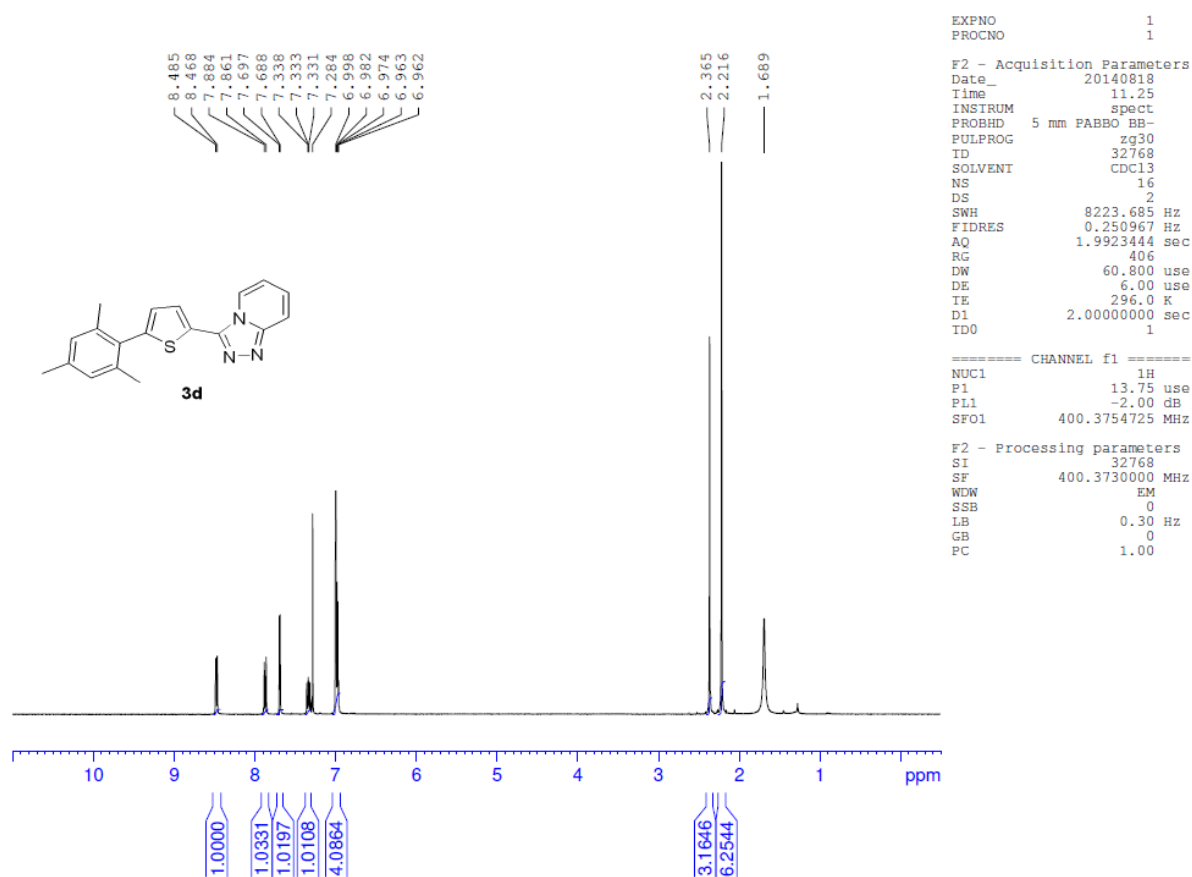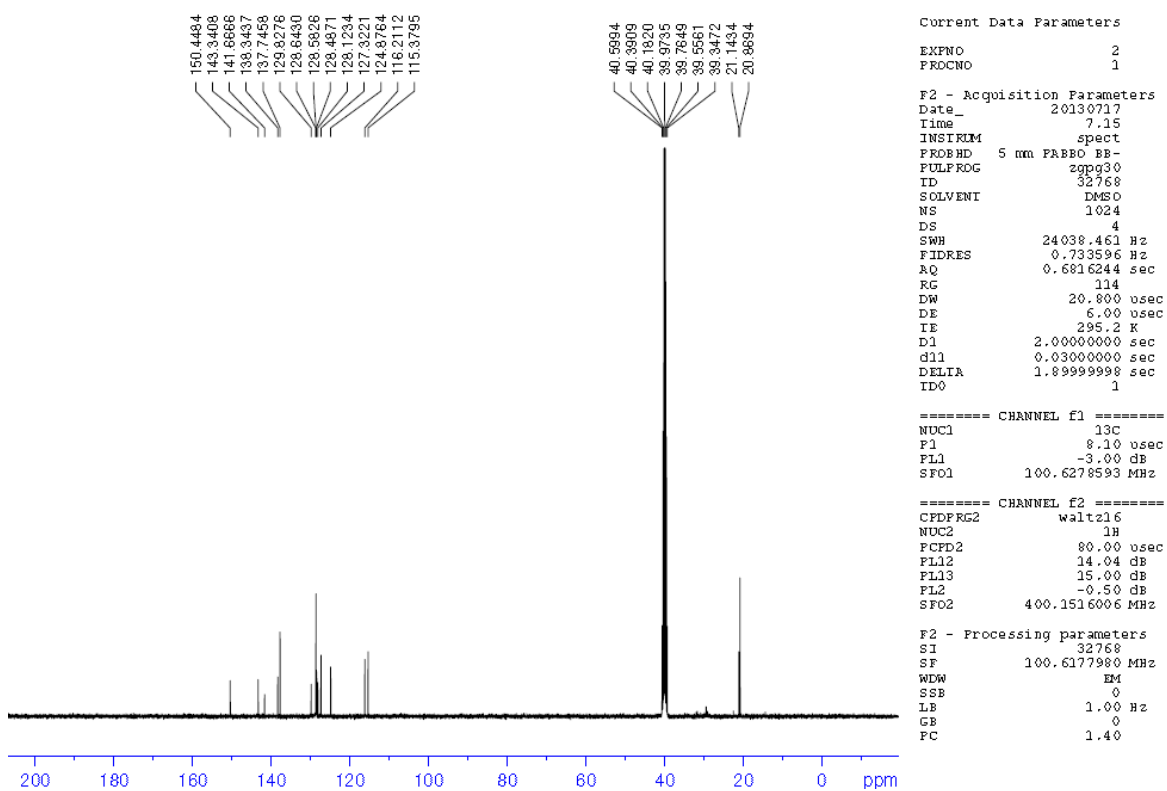

5. <sup>1</sup>H and <sup>13</sup>C NMR spectrum of 3-(5-(4-*tert*-Butylphenyl)thiophen-2-yl)-[1,2,4]triazolo[4,3-a]pyridine (3e)

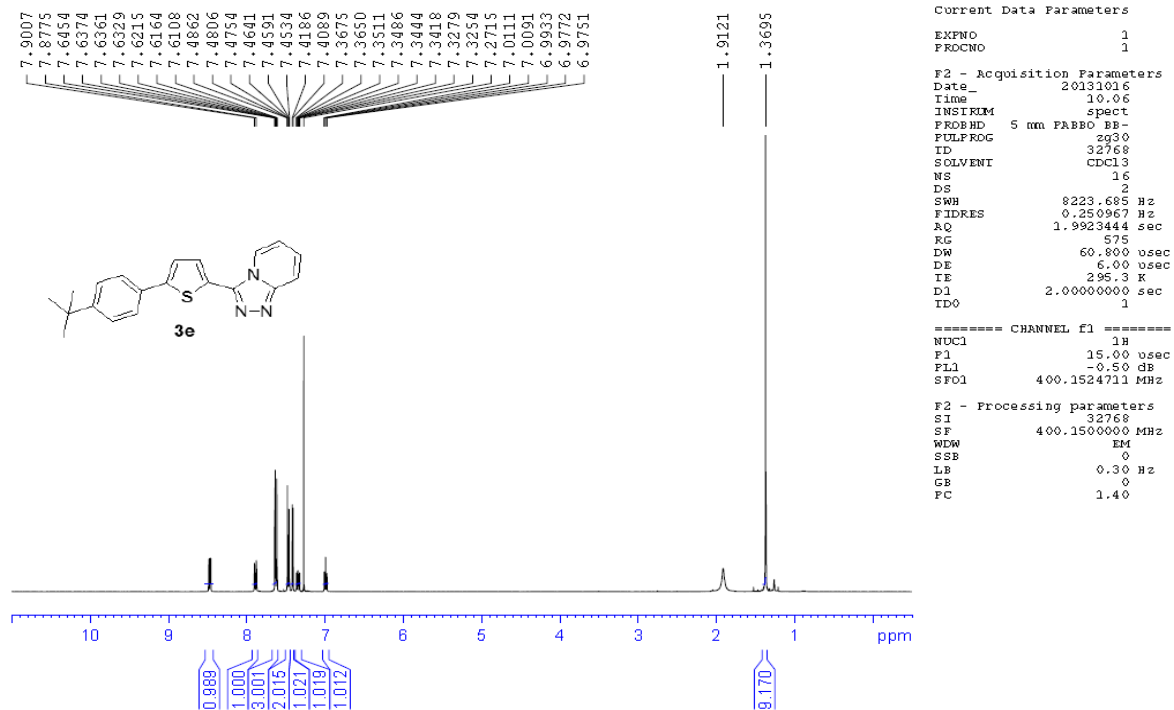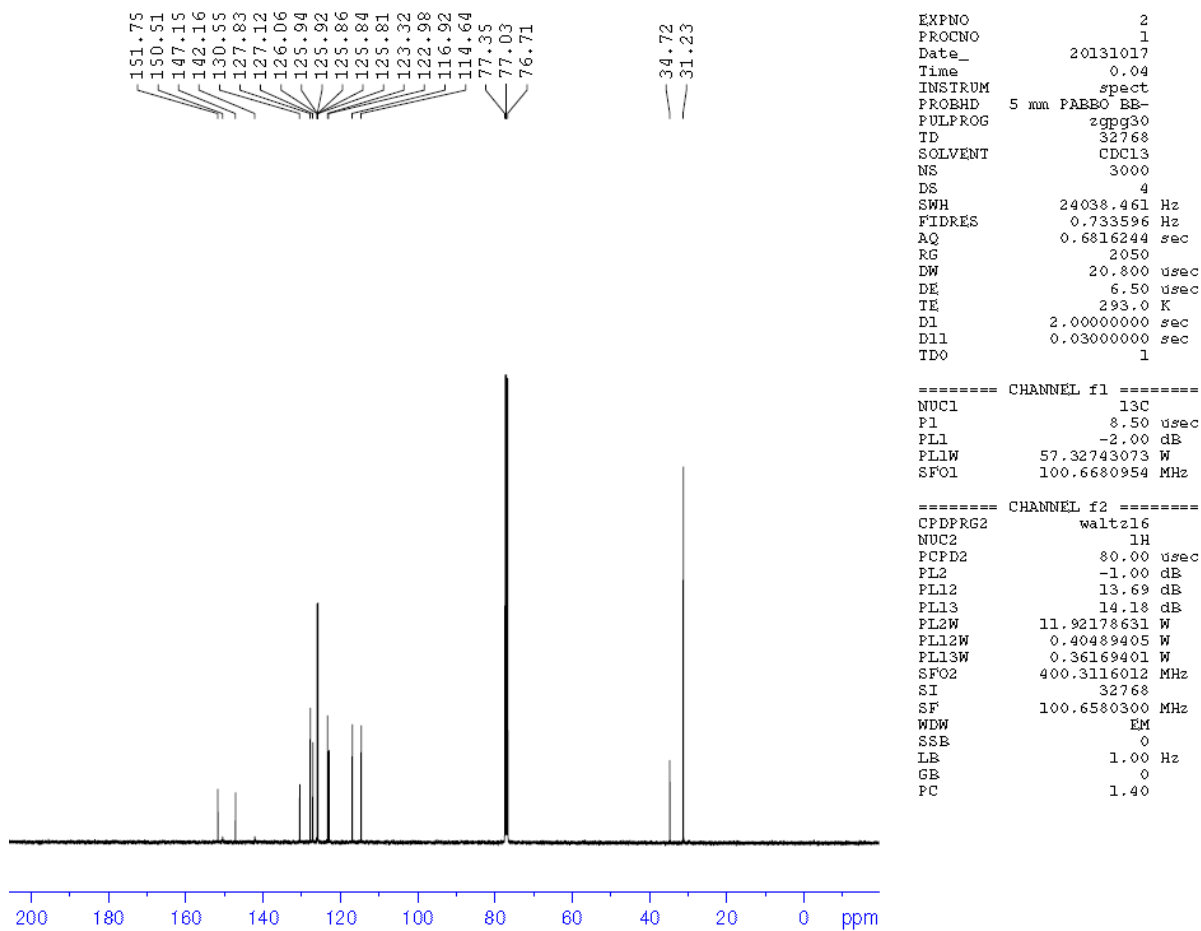

6. <sup>1</sup>H and <sup>13</sup>C NMR spectrum of 3-(5-(4-Methoxyphenyl)thiophen-2-yl)-[1,2,4]triazolo[4,3-a]pyridine (3f)

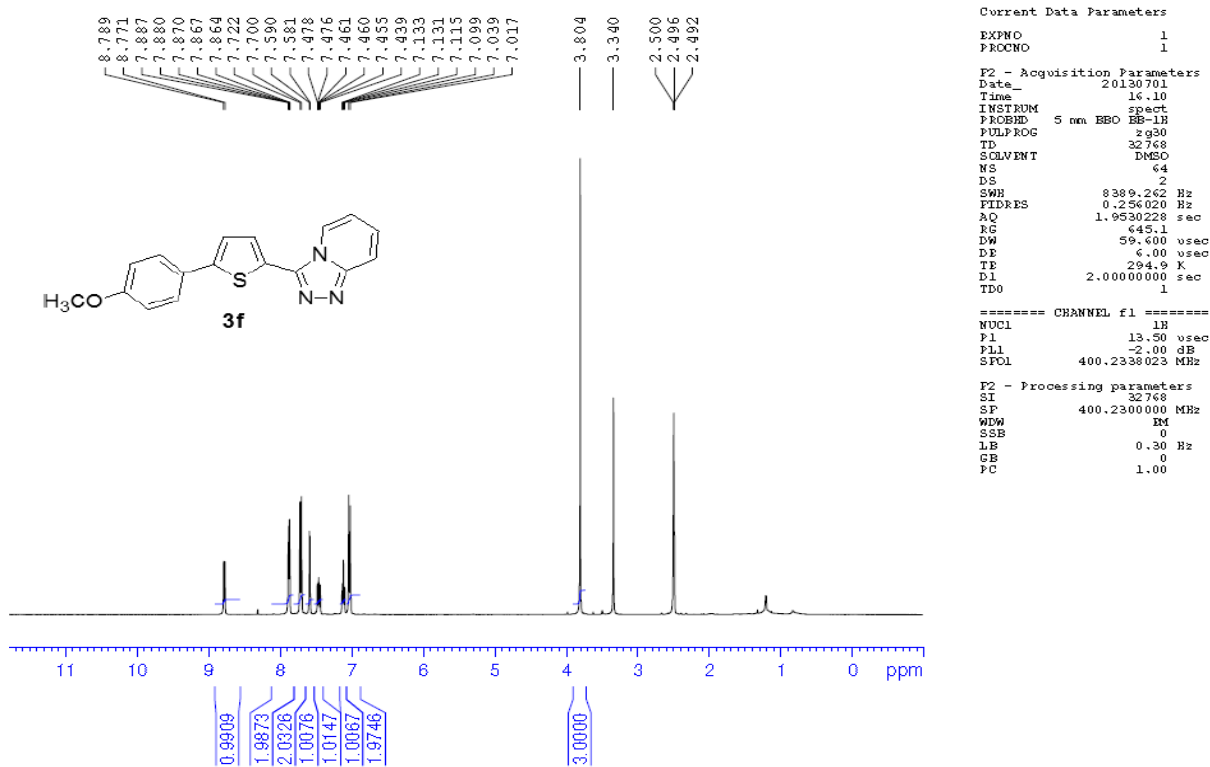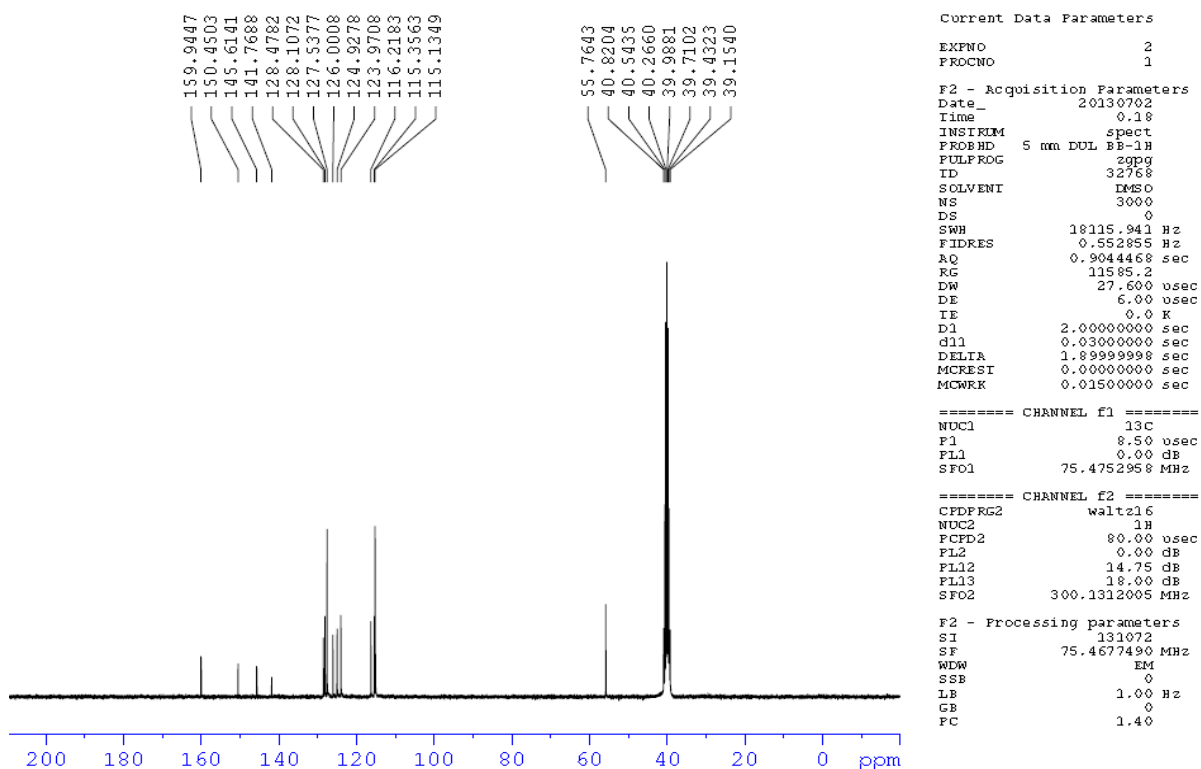

7.  $^1\text{H}$  and  $^{13}\text{C}$  NMR spectrum of 3-(5-(3-Methoxyphenyl)thiophen-2-yl)-[1,2,4]triazolo[4,3-a]pyridine (3g)

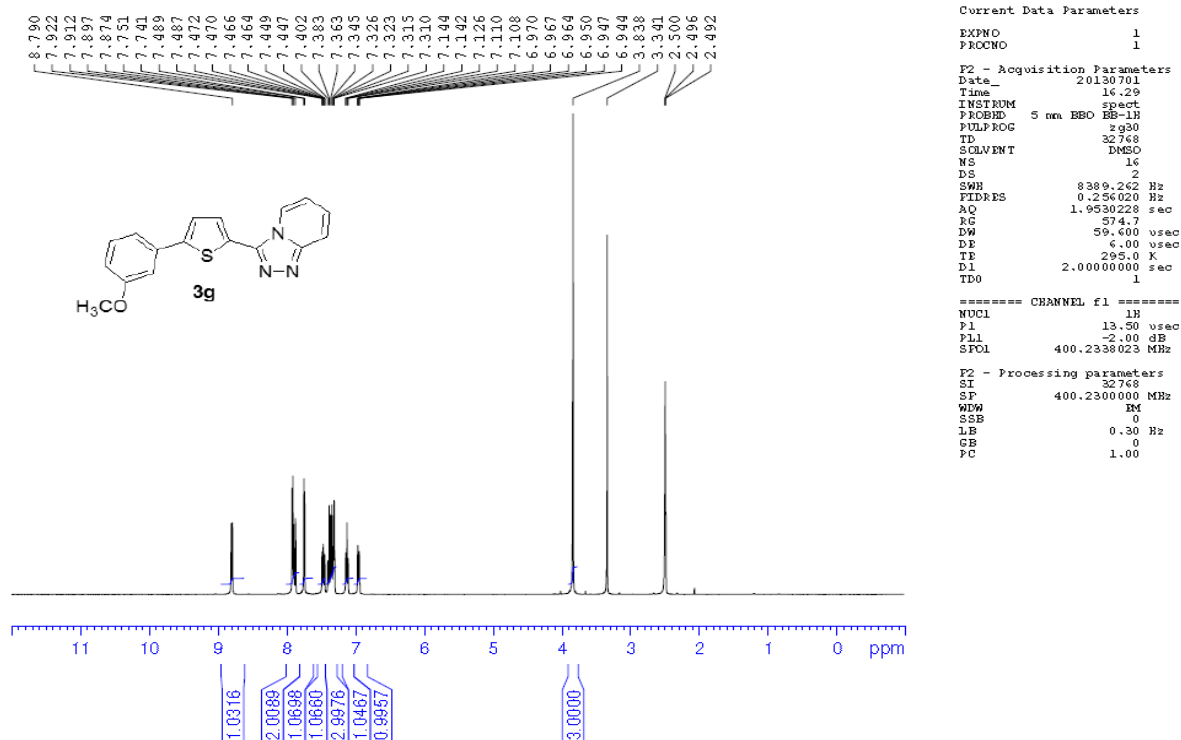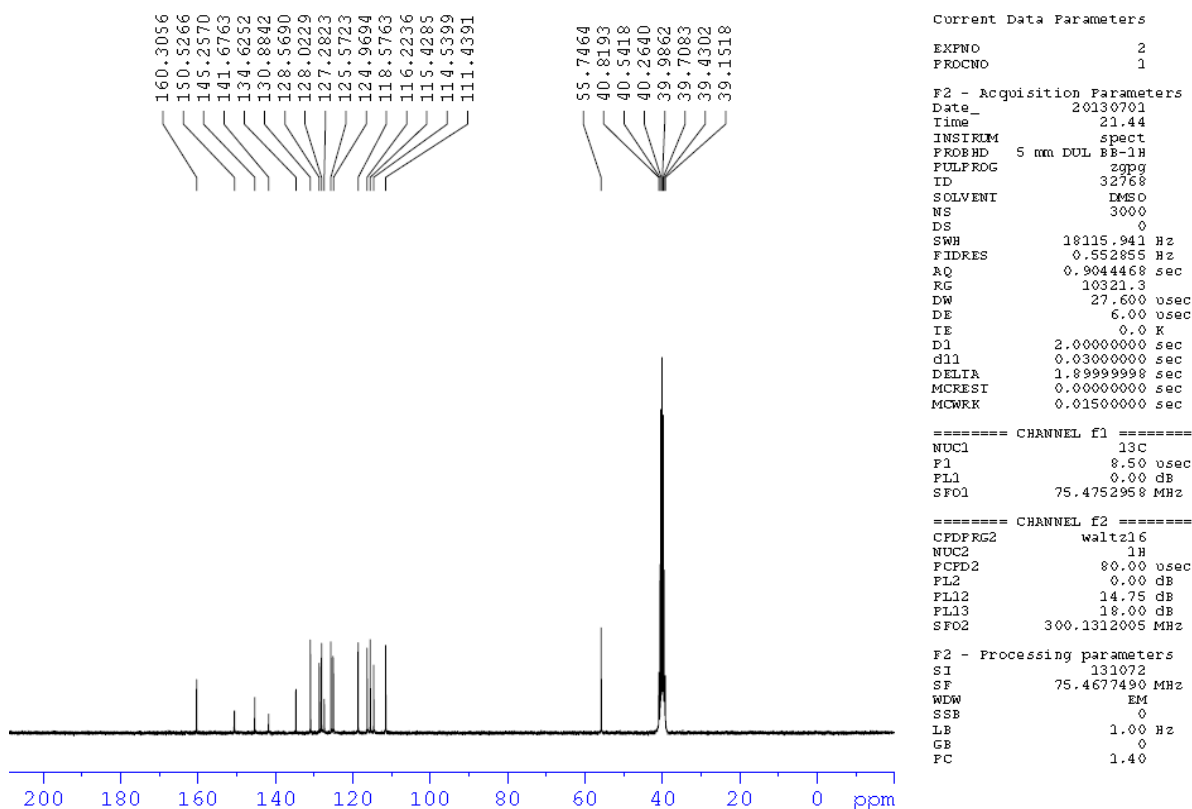

8. <sup>1</sup>H and <sup>13</sup>C NMR spectrum of 3-(5-(3-Ethoxyphenyl)thiophen-2-yl)-[1,2,4]triazolo[4,3-a]pyridine (3h)



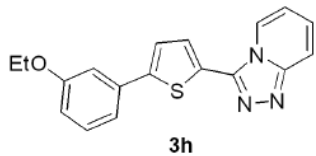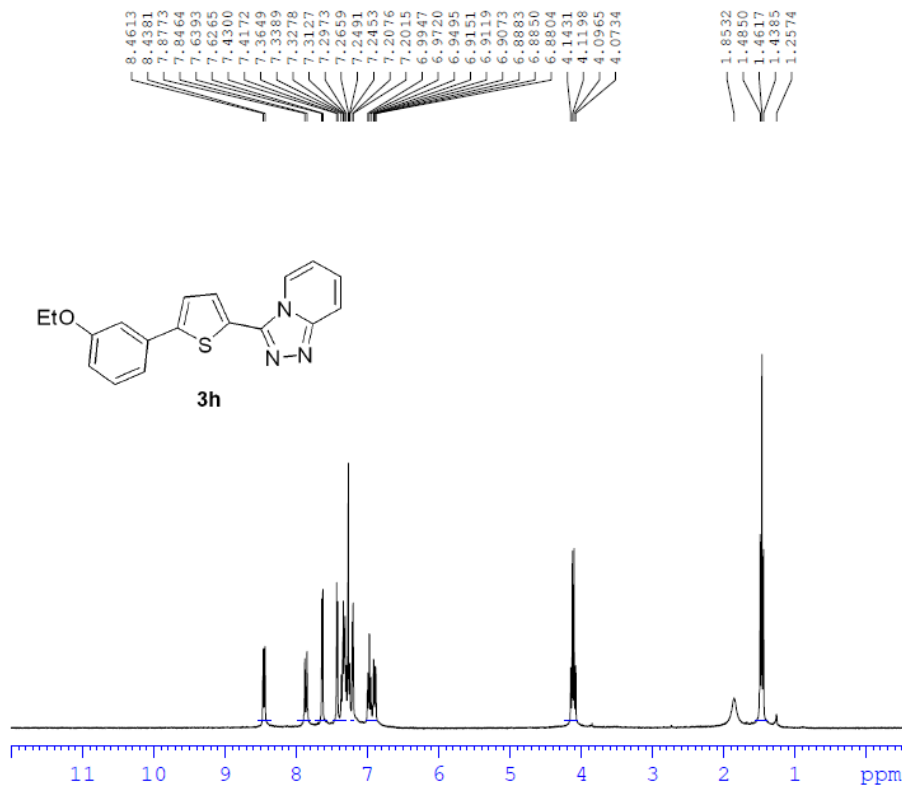

```

EXPNO          1
PROCNO         1

F2 - Acquisition Parameters
Date_          20140819
Time           18.05
INSTRUM        spect
PROBHD         5 mm DUL BB-1H
PULPROG        zg30
TD             32768
SOLVENT        CDCl3
NS             16
DS             2
SWH            5995.204 Hz
FIDRES         0.182959 Hz
AQ             2.7329011 sec
RG             512
DW             83.400 usec
DE             6.00 usec
TE             0.0 K
D1             2.00000000 sec
MCREST         0.00000000 sec
MCWRK          0.01500000 sec
  
```

```

===== CHANNEL f1 =====
NUC1           1H
P1             14.65 usec
PL1            0.00 dB
SFO1          300.1318008 MHz
  
```

```

F2 - Processing parameters
SI             32768
SF            300.1298168 MHz
WDW            EM
SSB            0
LB             0.30 Hz
GB             0
PC             1.40
  
```

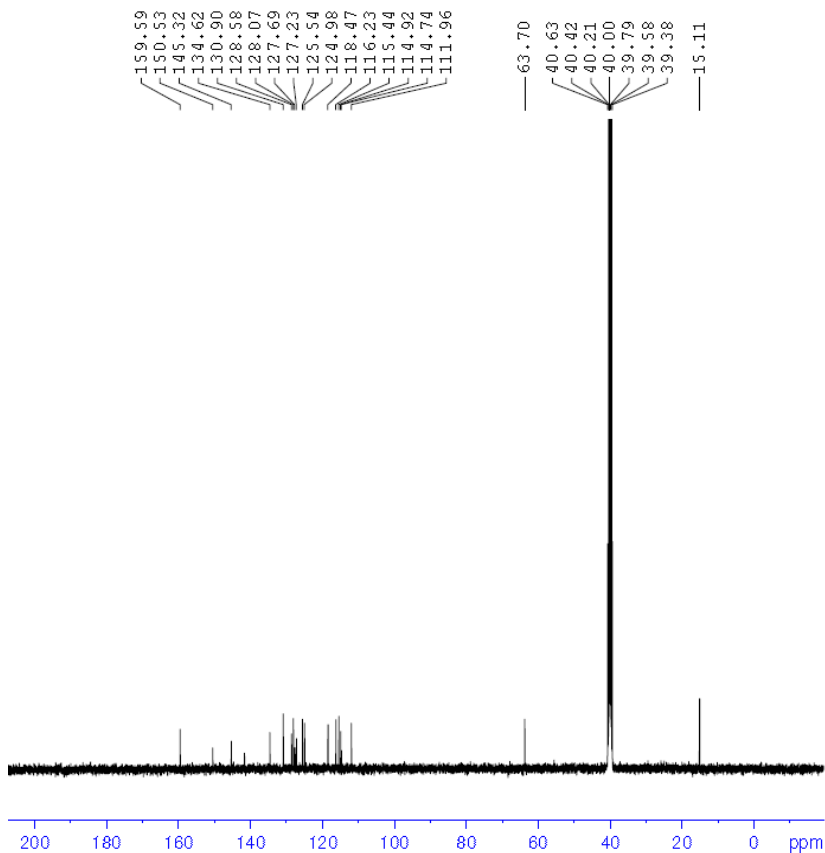

```

EXPNO          2
PROCNO         1
Date_          20130716
Time           0.38
INSTRUM        spect
PROBHD         5 mm PABBO BB-
PULPROG        zgpg30
TD             32768
SOLVENT        DMSO
NS             1024
DS             4
SWH            24038.461 Hz
FIDRES         0.733596 Hz
AQ             0.6816244 sec
RG             2050
DW             20.800 usec
DE             6.50 usec
TE             293.0 K
D1             2.00000000 sec
D11            0.03000000 sec
TD0            1
  
```

```

===== CHANNEL f1 =====
NUC1           13C
P1             8.50 usec
PL1            -2.00 dB
PL1W           57.32743073 W
SFO1          100.6280954 MHz
  
```

```

===== CHANNEL f2 =====
CPDPRG2        waltz16
NUC2           1H
PCPD2          80.00 usec
PL2            -1.00 dB
PL12           13.69 dB
PL13           14.18 dB
PL2W           11.92178631 W
PL12W          0.40489405 W
PL13W          0.36169401 W
SFO2           400.3116012 MHz
SI             32768
SF            100.6280300 MHz
WDW            EM
SSB            0
LB             1.00 Hz
GB             0
PC             1.40
  
```

9. <sup>1</sup>H and <sup>13</sup>C NMR spectrum of 3-(5-(2-(Methylthio)phenyl)thiophen-2-yl)-[1,2,4]triazolo[4,3-a]pyridine (3i)

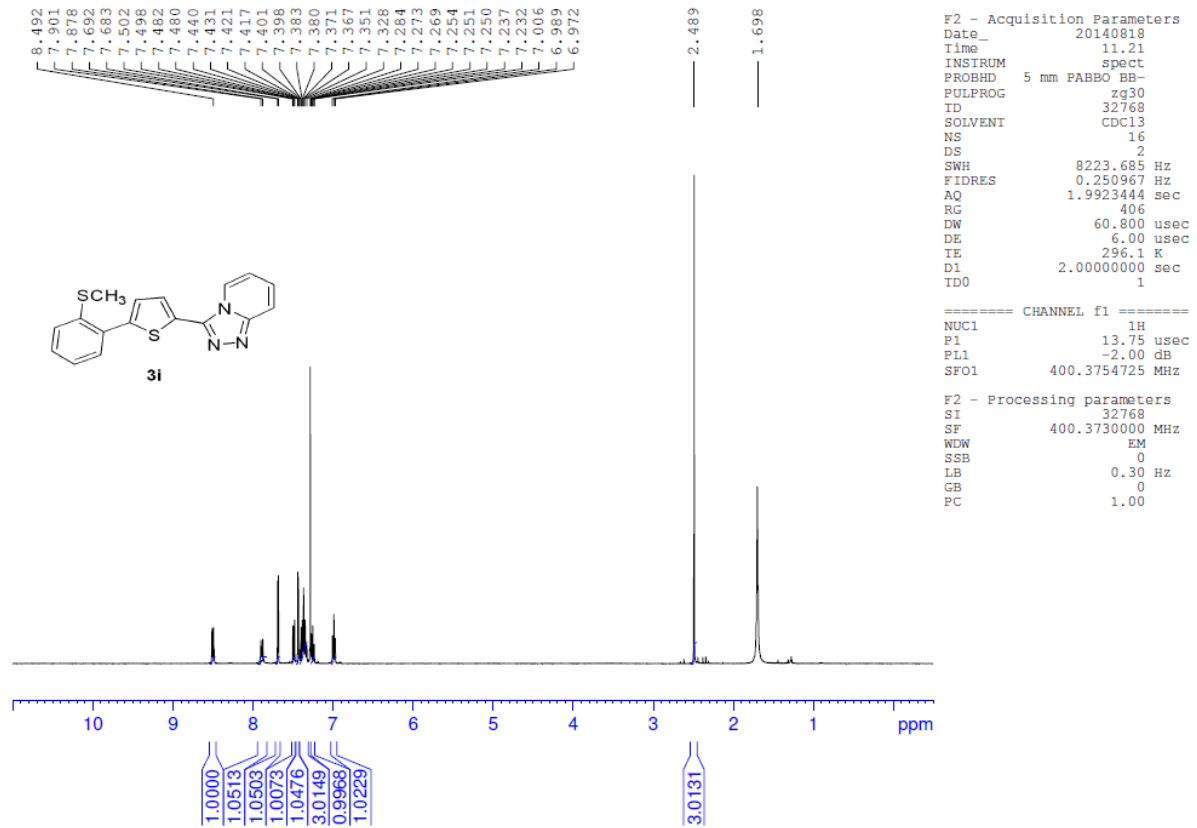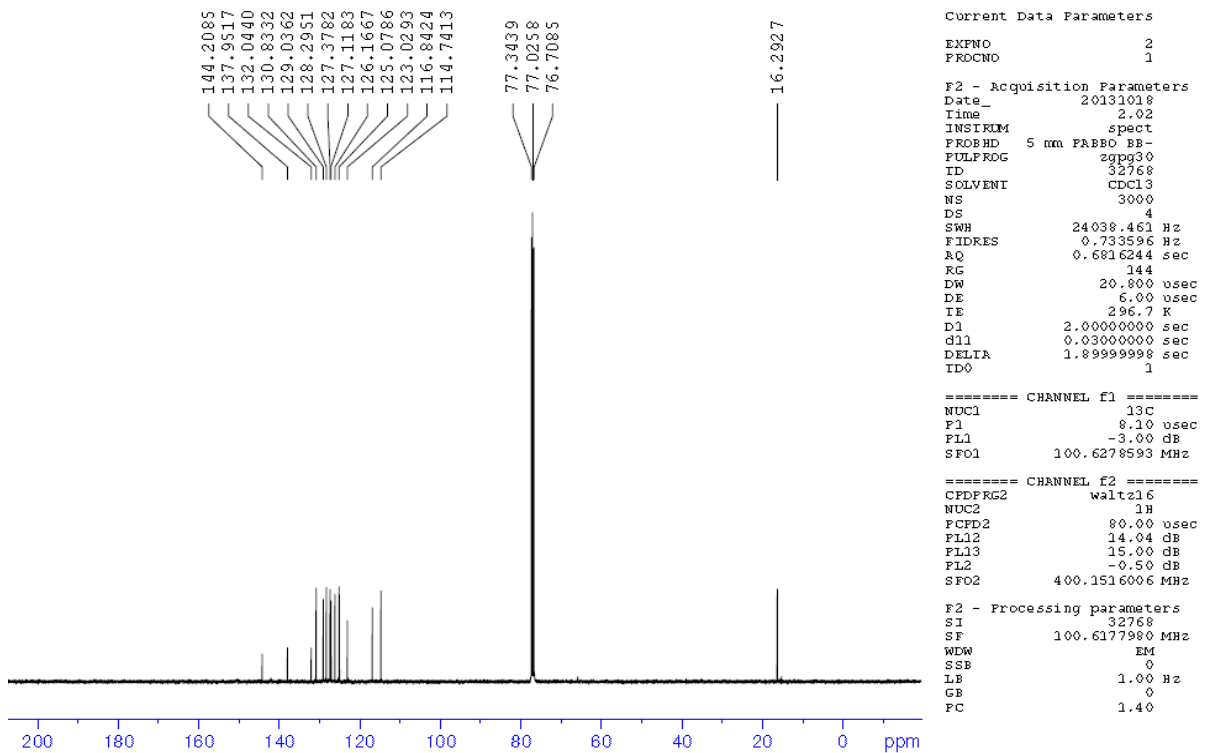

10. <sup>1</sup>H and <sup>13</sup>C NMR spectrum of 3-(5-(3-(Methylthio)phenyl)thiophen-2-yl)-[1,2,4]triazolo[4,3-a]pyridine (3j)

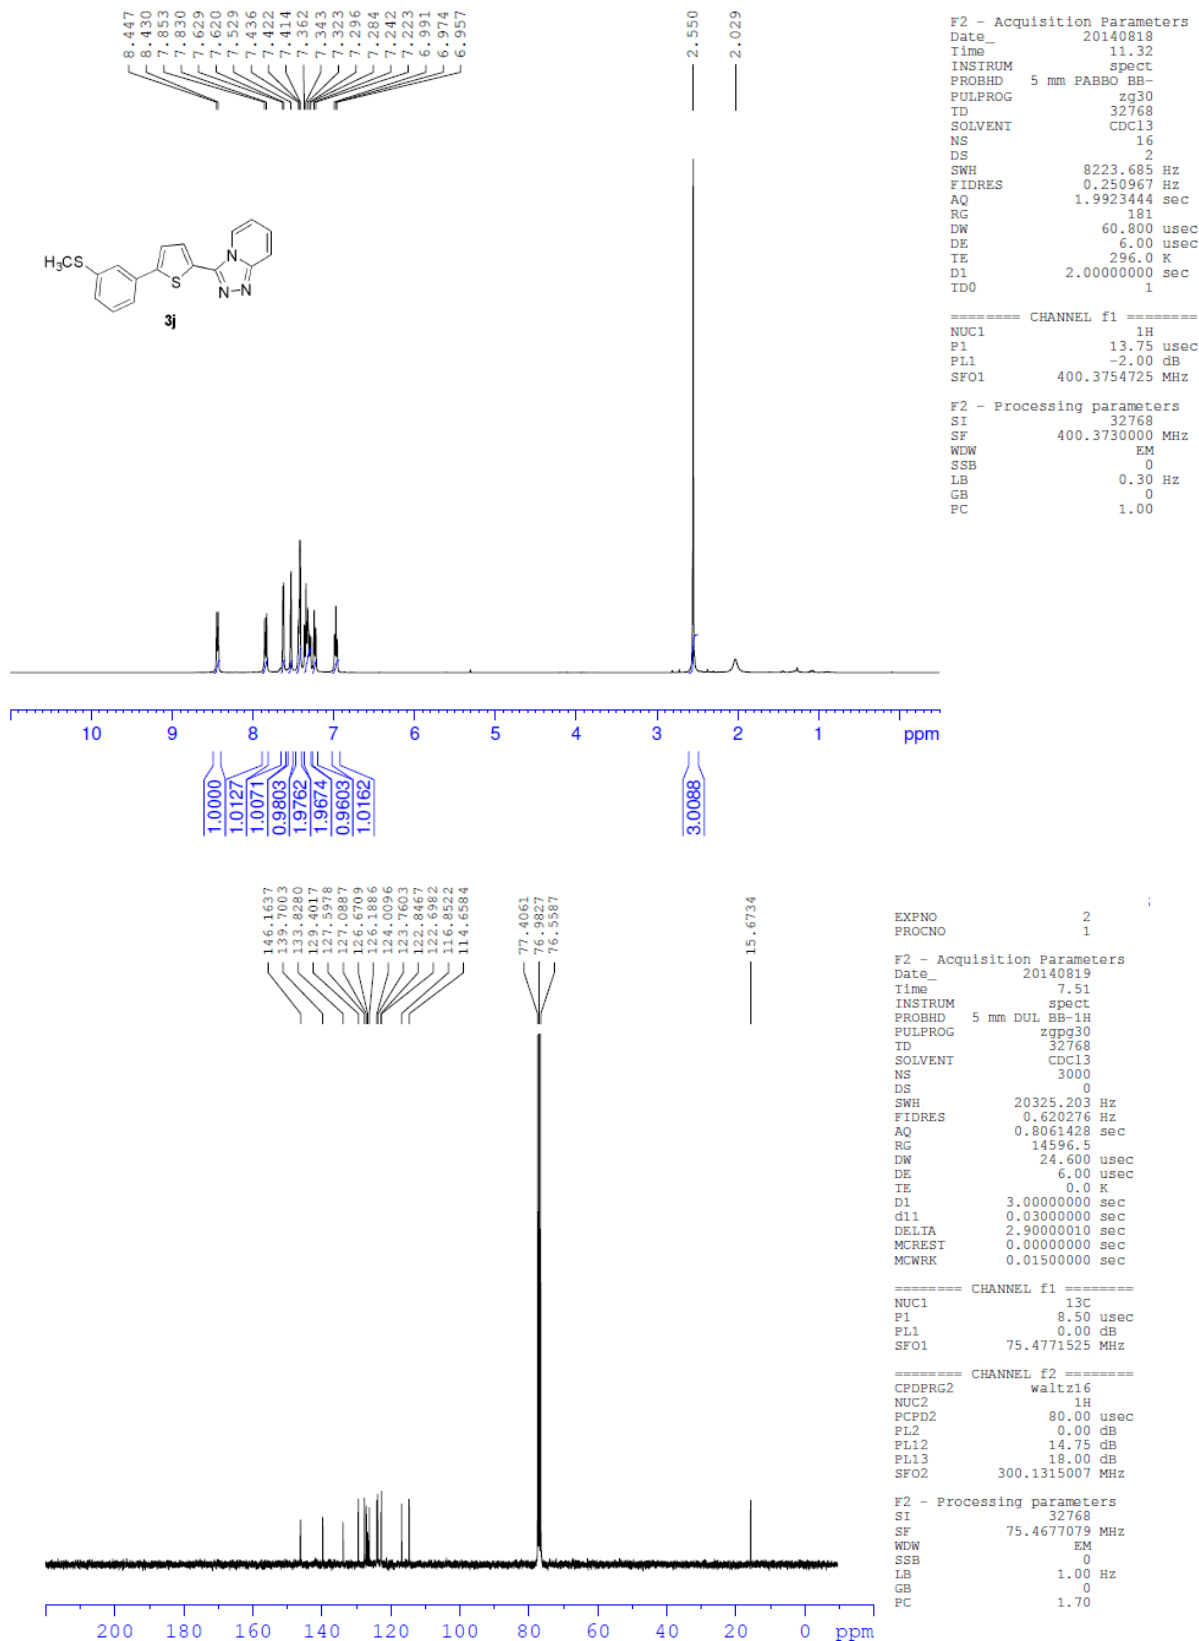

11. <sup>1</sup>H and <sup>13</sup>C NMR spectrum of 3-(5-(Biphenyl-3-yl)thiophen-2-yl)-[1,2,4]triazolo[4,3-a]pyridine (3k)

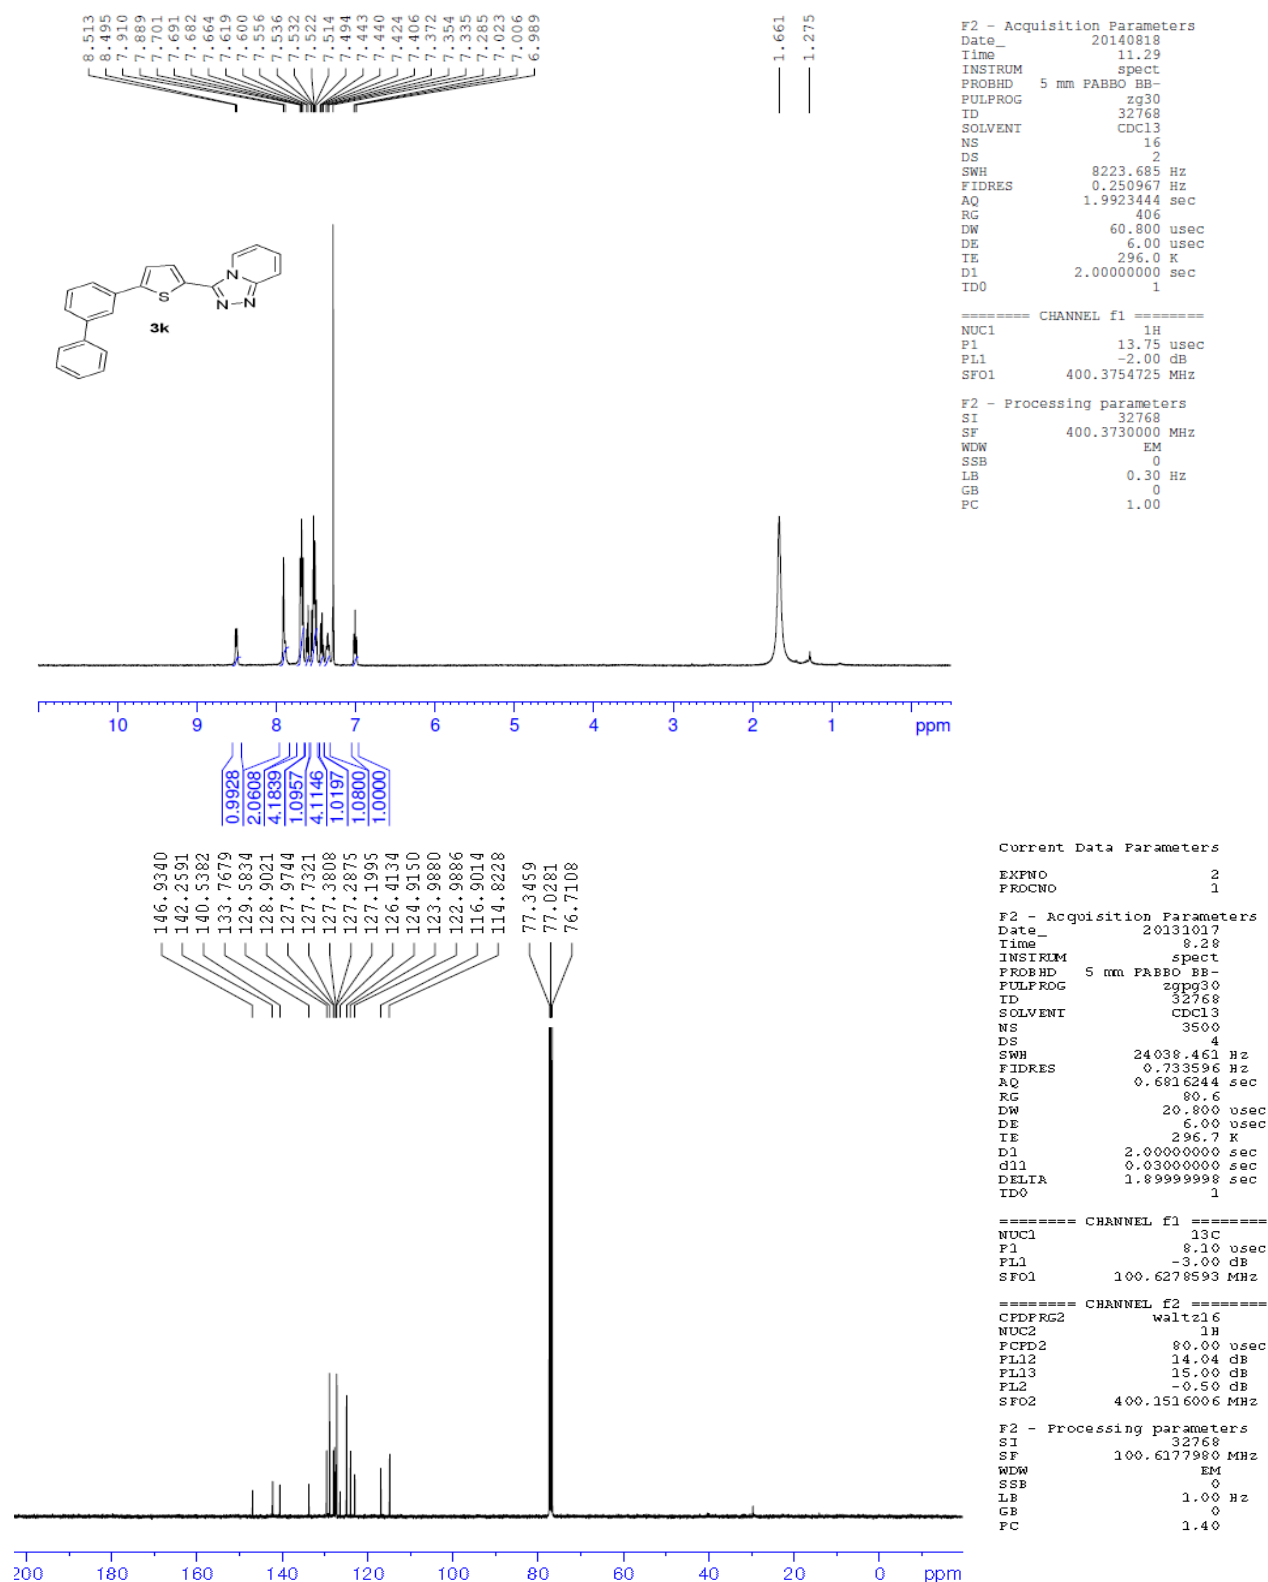

12. <sup>1</sup>H and <sup>13</sup>C NMR spectrum of 3-(5-(Naphthalen-2-yl)thiophen-2-yl)-[1,2,4]triazolo[4,3-a]pyridine (3l)

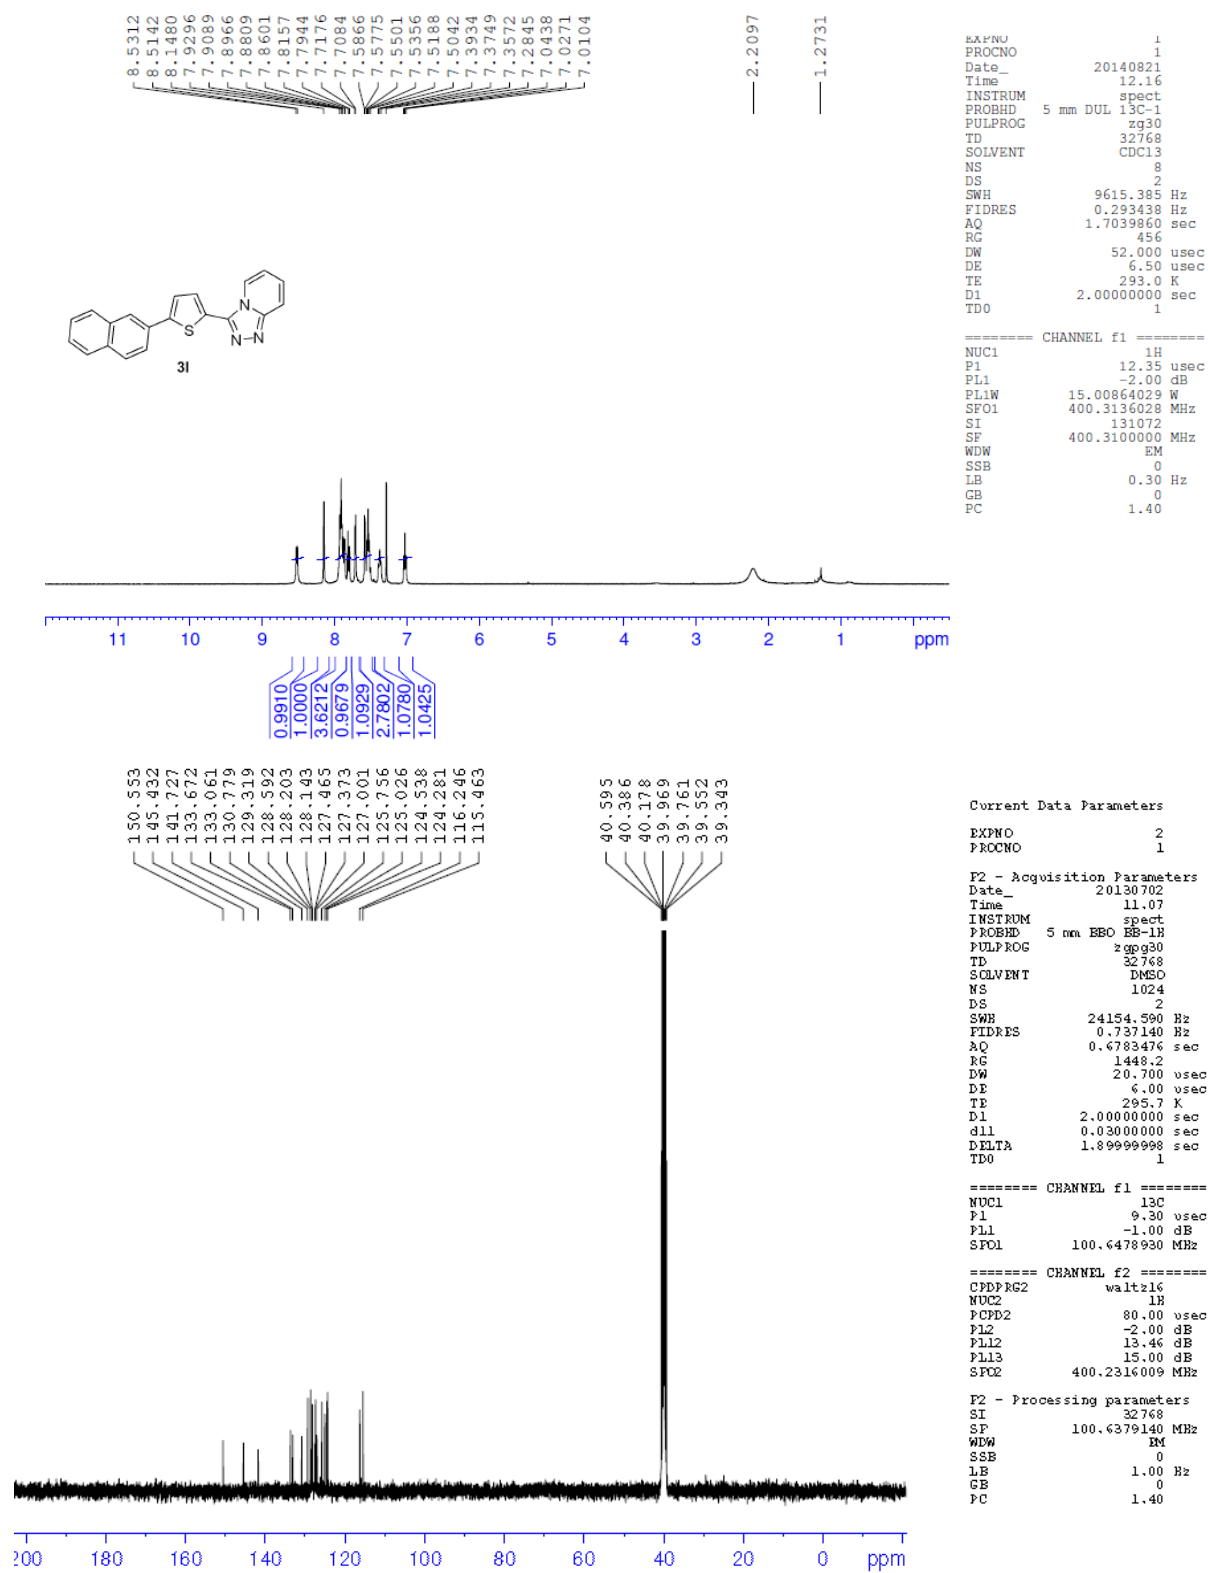

13. <sup>1</sup>H and <sup>13</sup>C NMR spectrum of 3-(5-Phenylfuran-2-yl)-[1,2,4]triazolo[4,3-a]pyridine (4a)

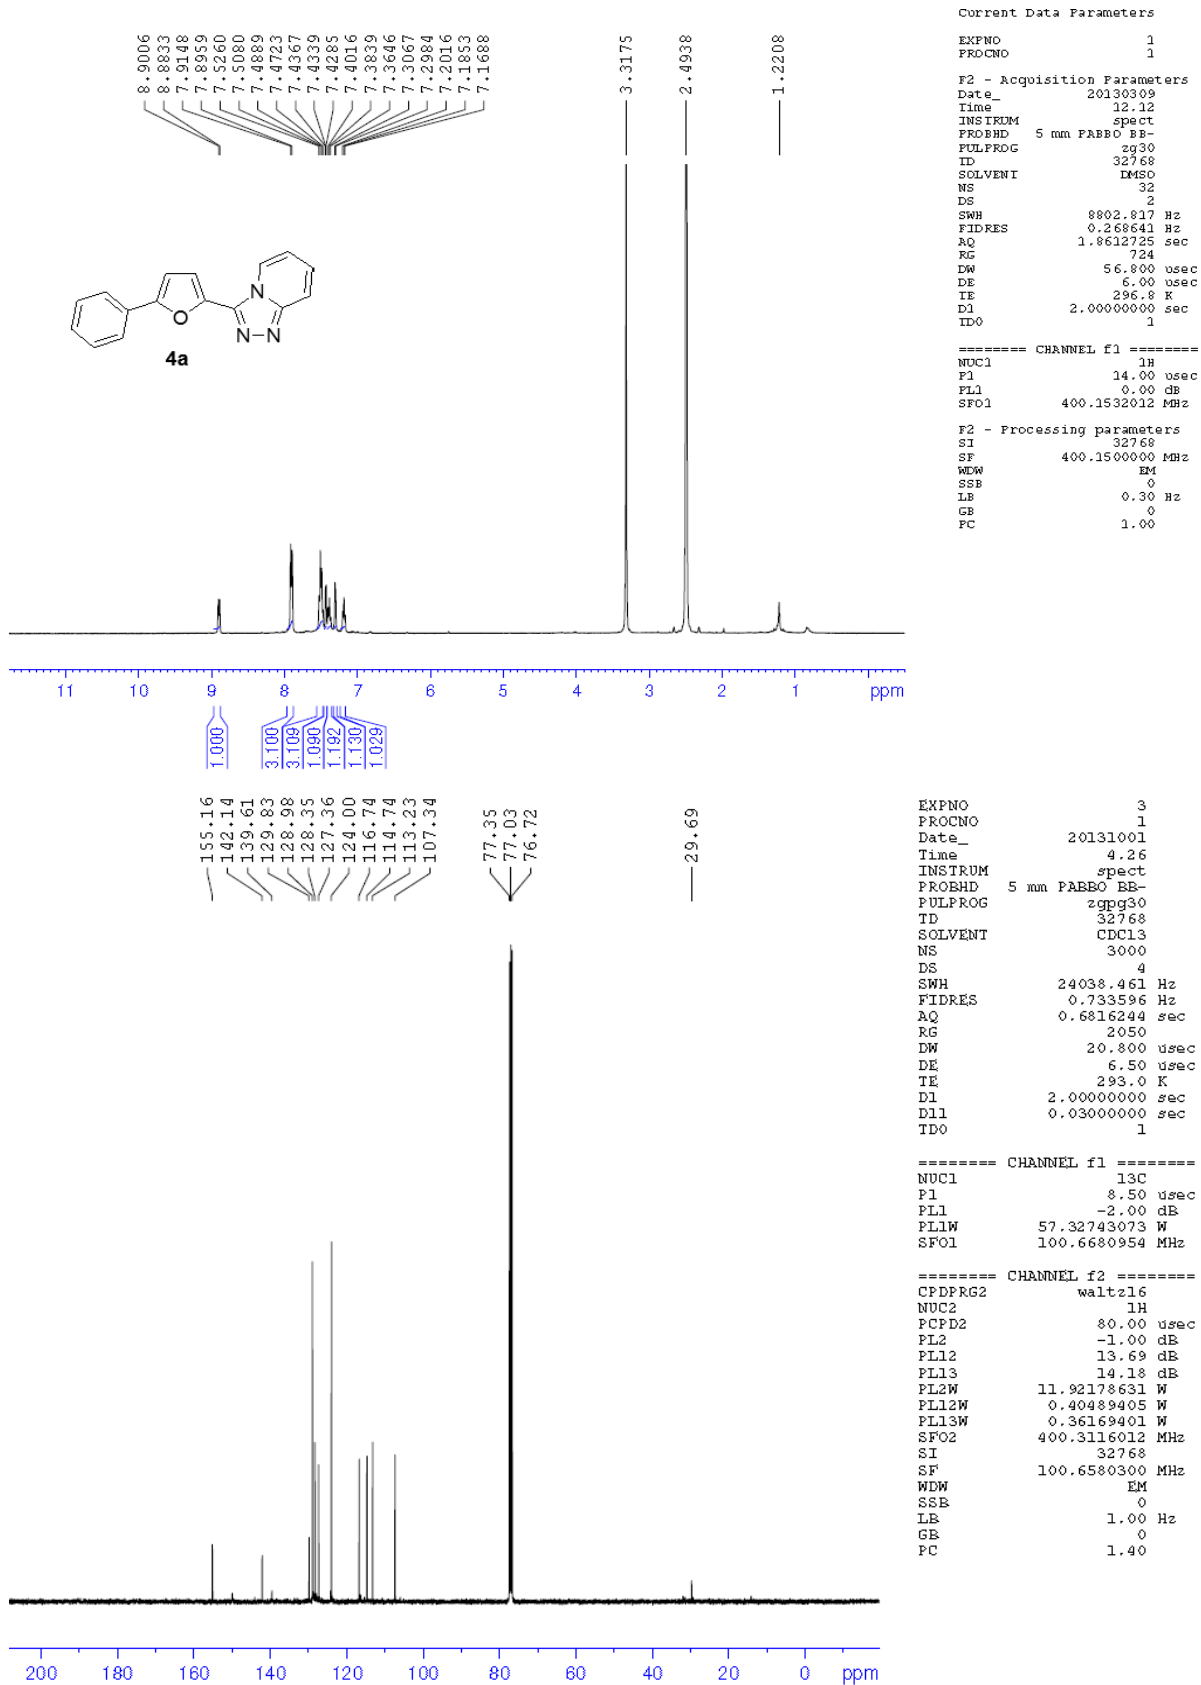

14. <sup>1</sup>H and <sup>13</sup>C NMR spectrum of 3-(5-(4-*tert*-Butylphenyl)furan-2-yl)-[1,2,4]triazolo[4,3-*a*]pyridine (4b)

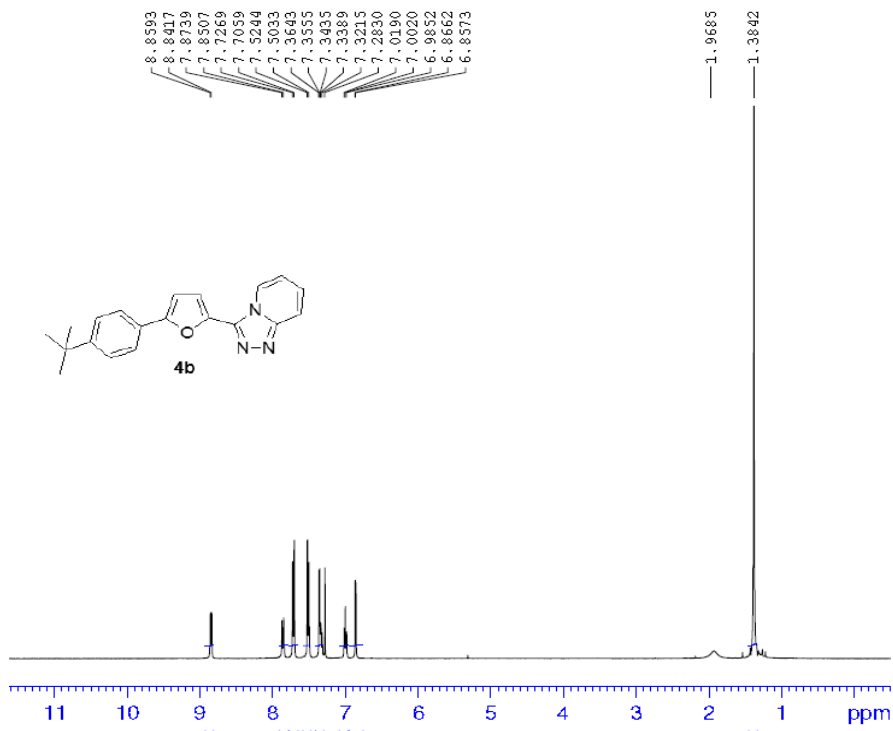

```

EXPNO          1
PROCNO         1
Date_          20130904
Time           11.14
INSTRUM        spect
PROBHD         5 mm PABBO BB-
PULPROG        zg30
ID             32768
SOLVENT        CDCl3
NS             8
DS             2
SWH            9615.385 Hz
FIDRES         0.293438 Hz
AQ            1.7039860 sec
RG             228
DW            52.000 usec
DE            6.50 usec
TE            293.0 K
D1            2.0000000 sec
ID0           1

===== CHANNEL f1 =====
NUC1           1H
P1            12.25 usec
PL1           -2.00 dB
PL1W          15.00864029 W
SFO1          400.3136028 MHz
SI            131072
SF            400.3100000 MHz
WDW            EM
SSB            0
LB            0.30 Hz
GB            0
PC            1.40
  
```

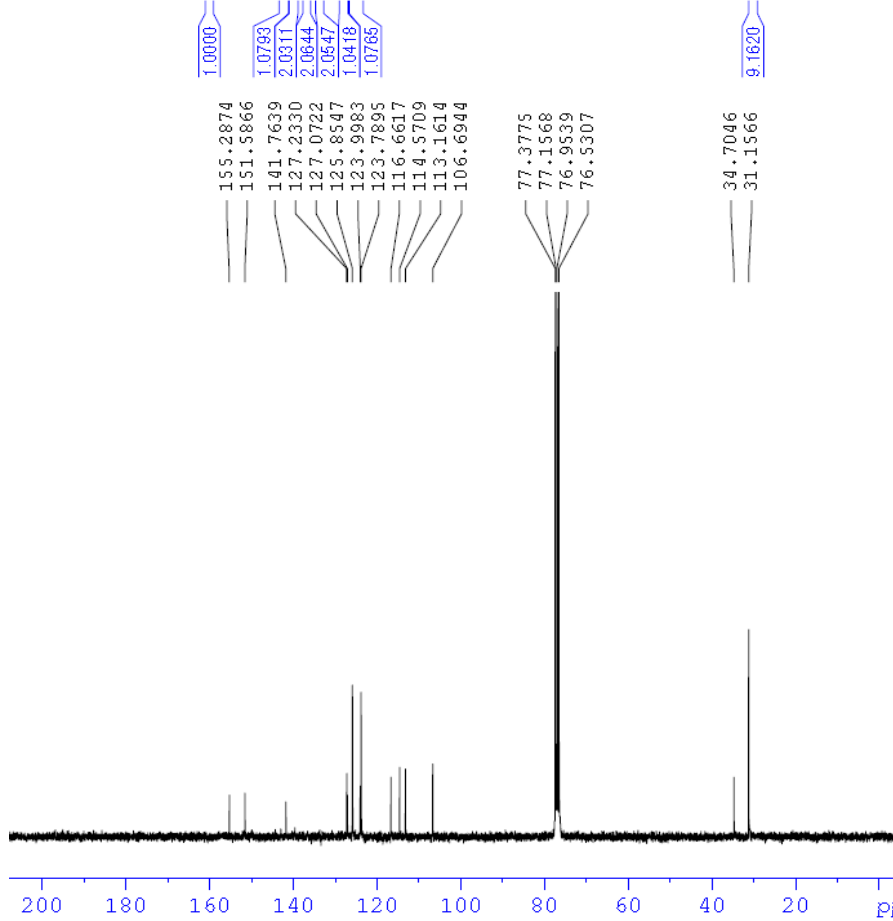

```

Current Data Parameters
EXPNO          2
PROCNO         1

F2 - Acquisition Parameters
Date_          20130904
Time           23.12
INSTRUM        spect
PROBHD         5 mm DUL BB-1H
PULPROG        zgpg30
ID             32768
SOLVENT        CDCl3
NS            2000
DS             0
SWH            20325.203 Hz
FIDRES         0.620276 Hz
AQ            0.8061428 sec
RG            16384
DW            24.600 usec
DE            6.00 usec
TE             0.0 K
D1            2.0000000 sec
d11           0.0300000 sec
DELTA         1.8999999 sec
MCREST        0.0000000 sec
MCWRK         0.0150000 sec

===== CHANNEL f1 =====
NUC1           13C
P1             8.50 usec
PL1            0.00 dB
SFO1          75.4771525 MHz

===== CHANNEL f2 =====
CFDPRG2       waltz16
NUC2           1H
PCPD2          80.00 usec
PL2            0.00 dB
PL12           14.75 dB
PL13           18.00 dB
SFO2          300.1315007 MHz

F2 - Processing parameters
SI            32768
SF            75.4677079 MHz
WDW            EM
SSB            0
LB            1.00 Hz
GB            0
PC            1.70
  
```

15. <sup>1</sup>H and <sup>13</sup>C NMR spectrum of 3-(5-Mesitylfuran-2-yl)-[1,2,4]triazolo[4,3-a]pyridine (4c)

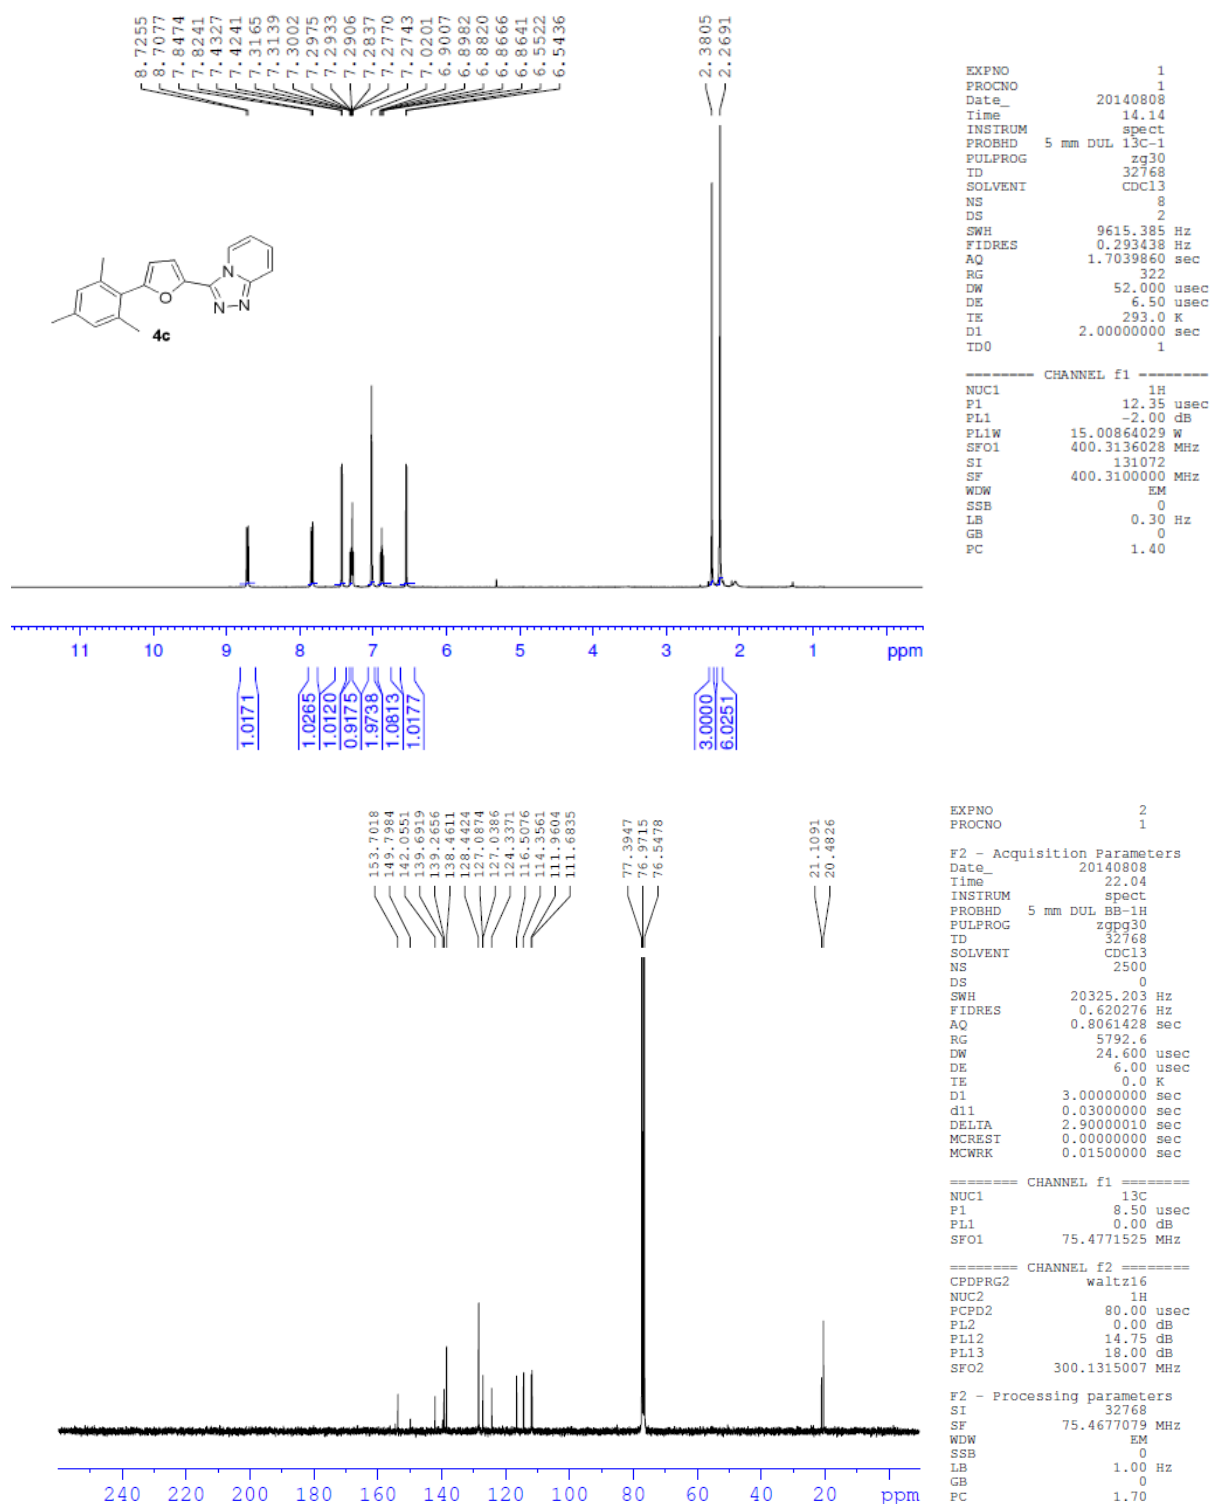



16. <sup>1</sup>H and <sup>13</sup>C NMR spectrum of 3-(5-(3-Methoxyphenyl)furan-2-yl)-[1,2,4]triazolo[4,3-a]pyridine (4d)

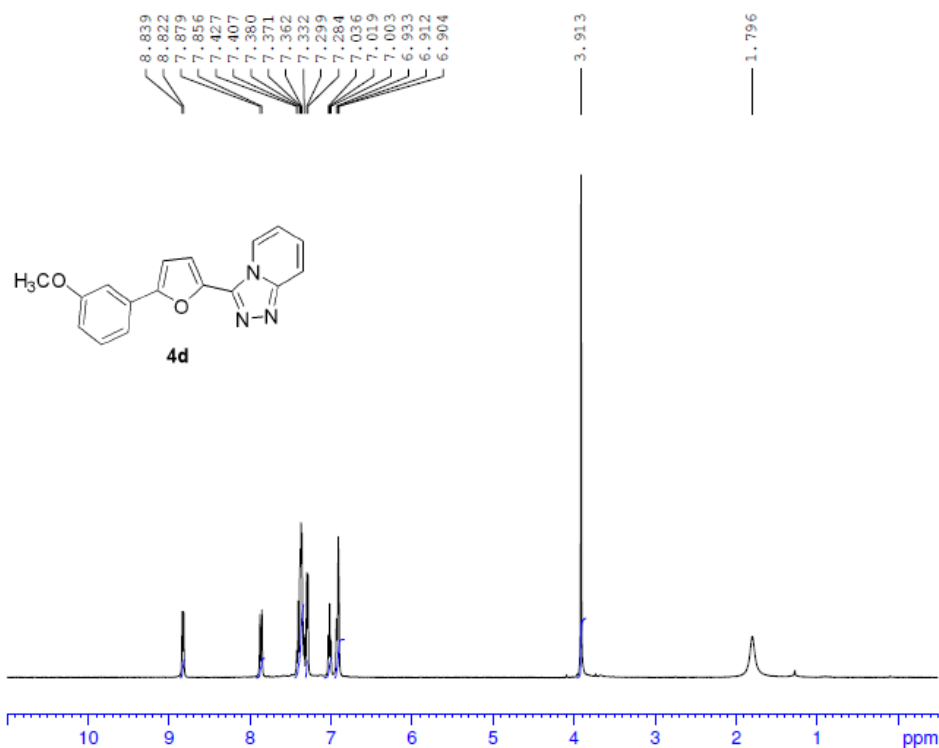

```

EXPNO          1
PROCNO         1
F2 - Acquisition Parameters
Date_          20140818
Time           11.16
INSTRUM       spect
PROBHD        5 mm PABBO BB-
PULPROG       zg30
ID            32768
SOLVENT       CDCl3
NS            16
DS            2
SWH           8223.685 Hz
FIDRES        0.250967 Hz
AQ            1.9923444 sec
RG            406
DW            60.800 usec
DE            6.00 usec
TE            296.0 K
D1            2.00000000 sec
D10           1
----- CHANNEL f1 -----
NUC1           1H
P1             13.75 usec
PL1            -2.00 dB
SFO1           400.3754725 MHz
F2 - Processing parameters
SI            32768
SF            400.3730000 MHz
WDW           EM
SSB           0
LB            0.30 Hz
GB            0
PC            1.00
    
```

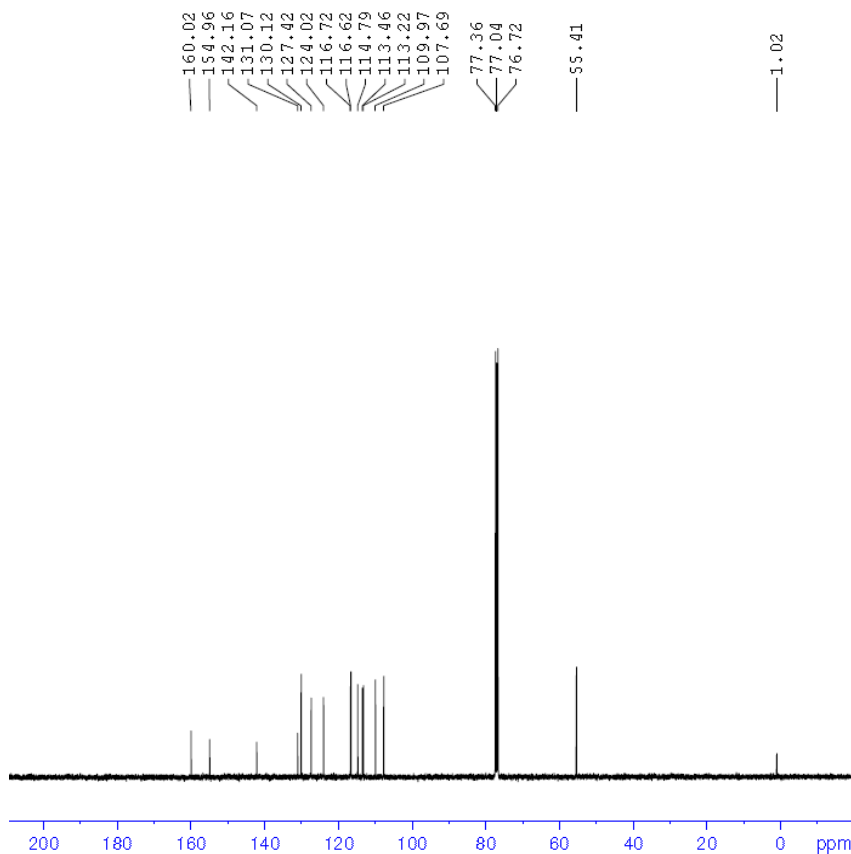

```

EXPNO          2
PROCNO         1
Date_          20130905
Time           5.04
INSTRUM       spect
PROBHD        5 mm PABBO BB-
PULPROG       zgpg30
ID            32768
SOLVENT       CDCl3
NS            1024
DS            4
SWH           24038.461 Hz
FIDRES        0.733596 Hz
AQ            0.6816244 sec
RG            2050
DW            20.800 usec
DE            6.50 usec
TE            293.0 K
D1            2.00000000 sec
D11           0.03000000 sec
D10           1
----- CHANNEL f1 -----
NUC1           13C
P1             8.50 usec
PL1            -2.00 dB
PL1W           57.32743073 W
SFO1           100.6280954 MHz
----- CHANNEL f2 -----
CPDPRG2       waltz16
NUC2           1H
PCPD2         80.00 usec
PL2            -1.00 dB
PL12           13.69 dB
PL13           14.18 dB
PL2W           11.92178631 W
PL12W          0.40489405 W
PL13W          0.36169401 W
SFO2           400.3116012 MHz
SI            32768
SF            100.6280300 MHz
WDW           EM
SSB           0
LB            1.00 Hz
GB            0
PC            1.40
    
```

17. <sup>1</sup>H and <sup>13</sup>C NMR spectrum of 3-(5-(4-Methoxyphenyl)furan-2-yl)-[1,2,4]triazolo[4,3-a]pyridine (4e)

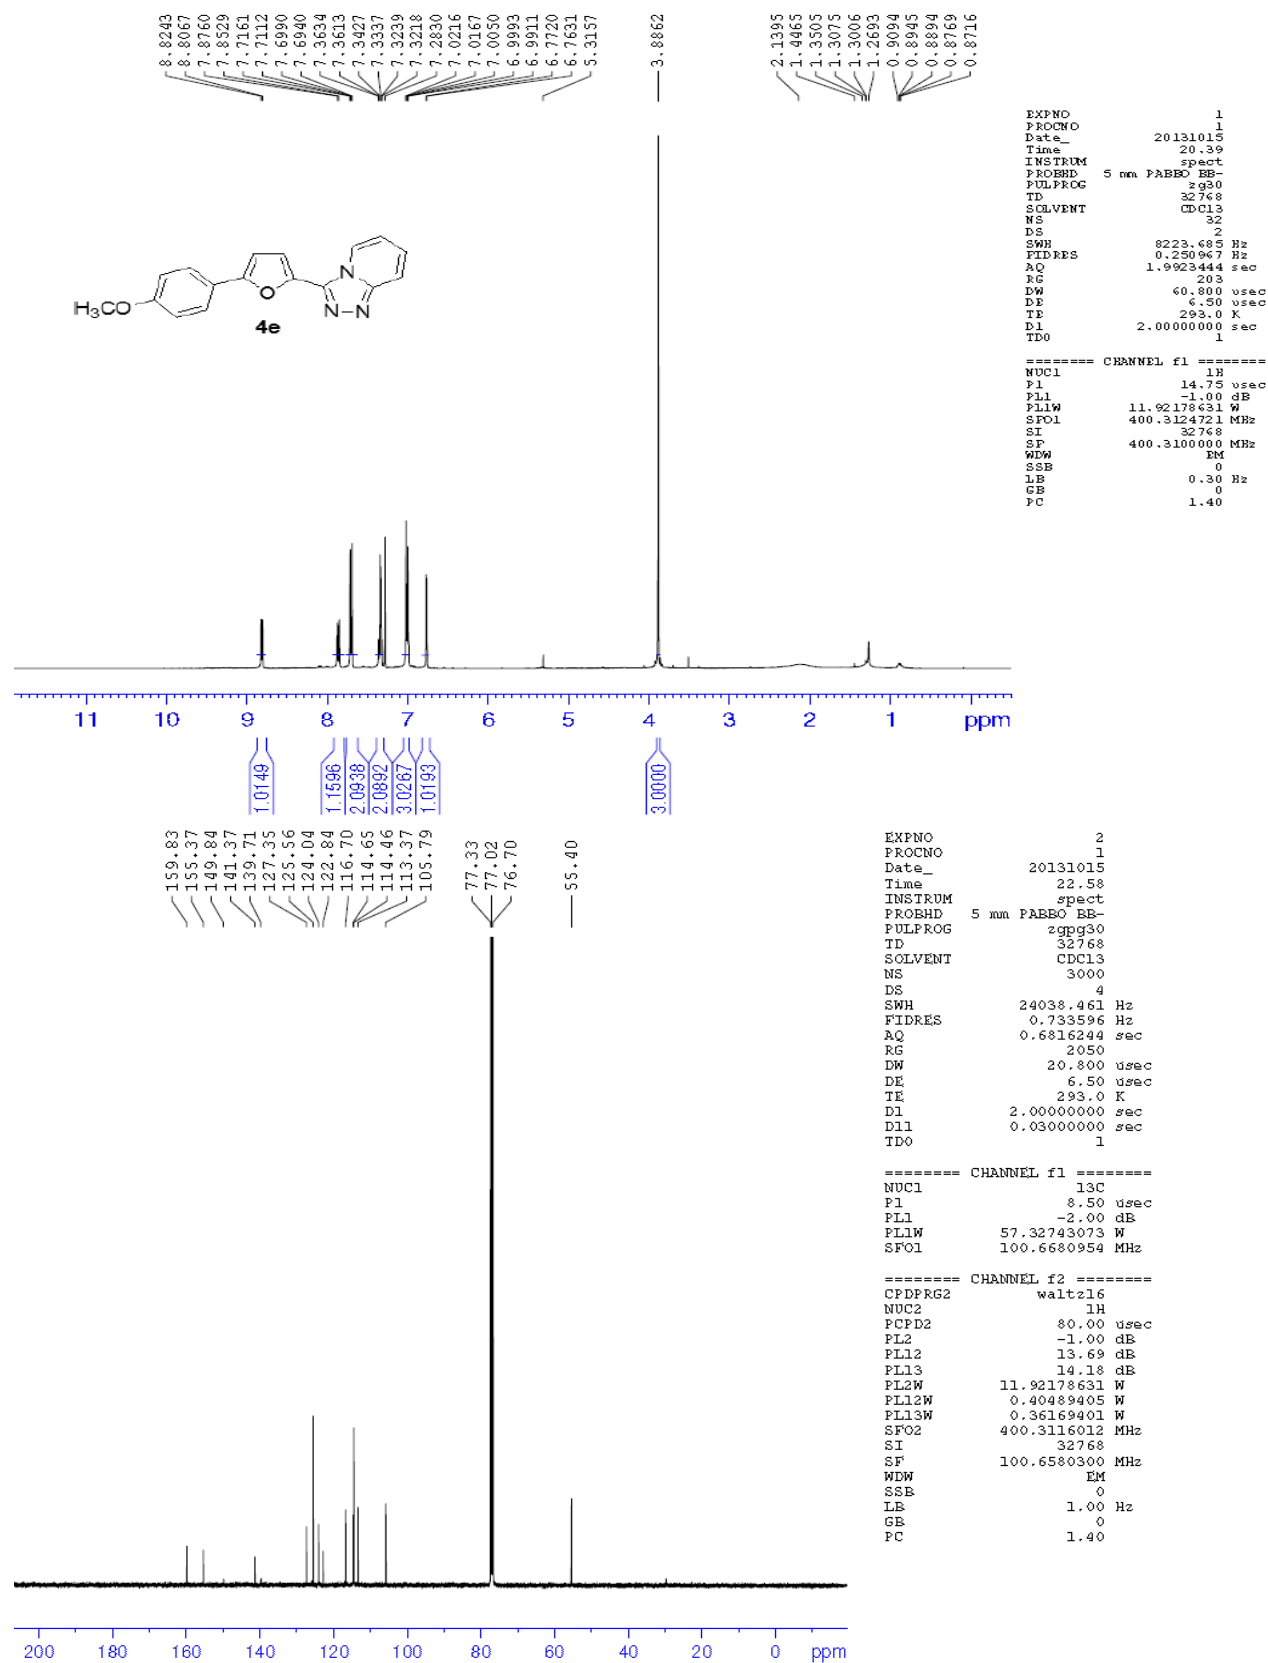

18. <sup>1</sup>H and <sup>13</sup>C NMR spectrum of 3-(5-(3-(Methylthio)phenyl)furan-2-yl)-[1,2,4]triazolo[4,3-a]pyridine (4f)

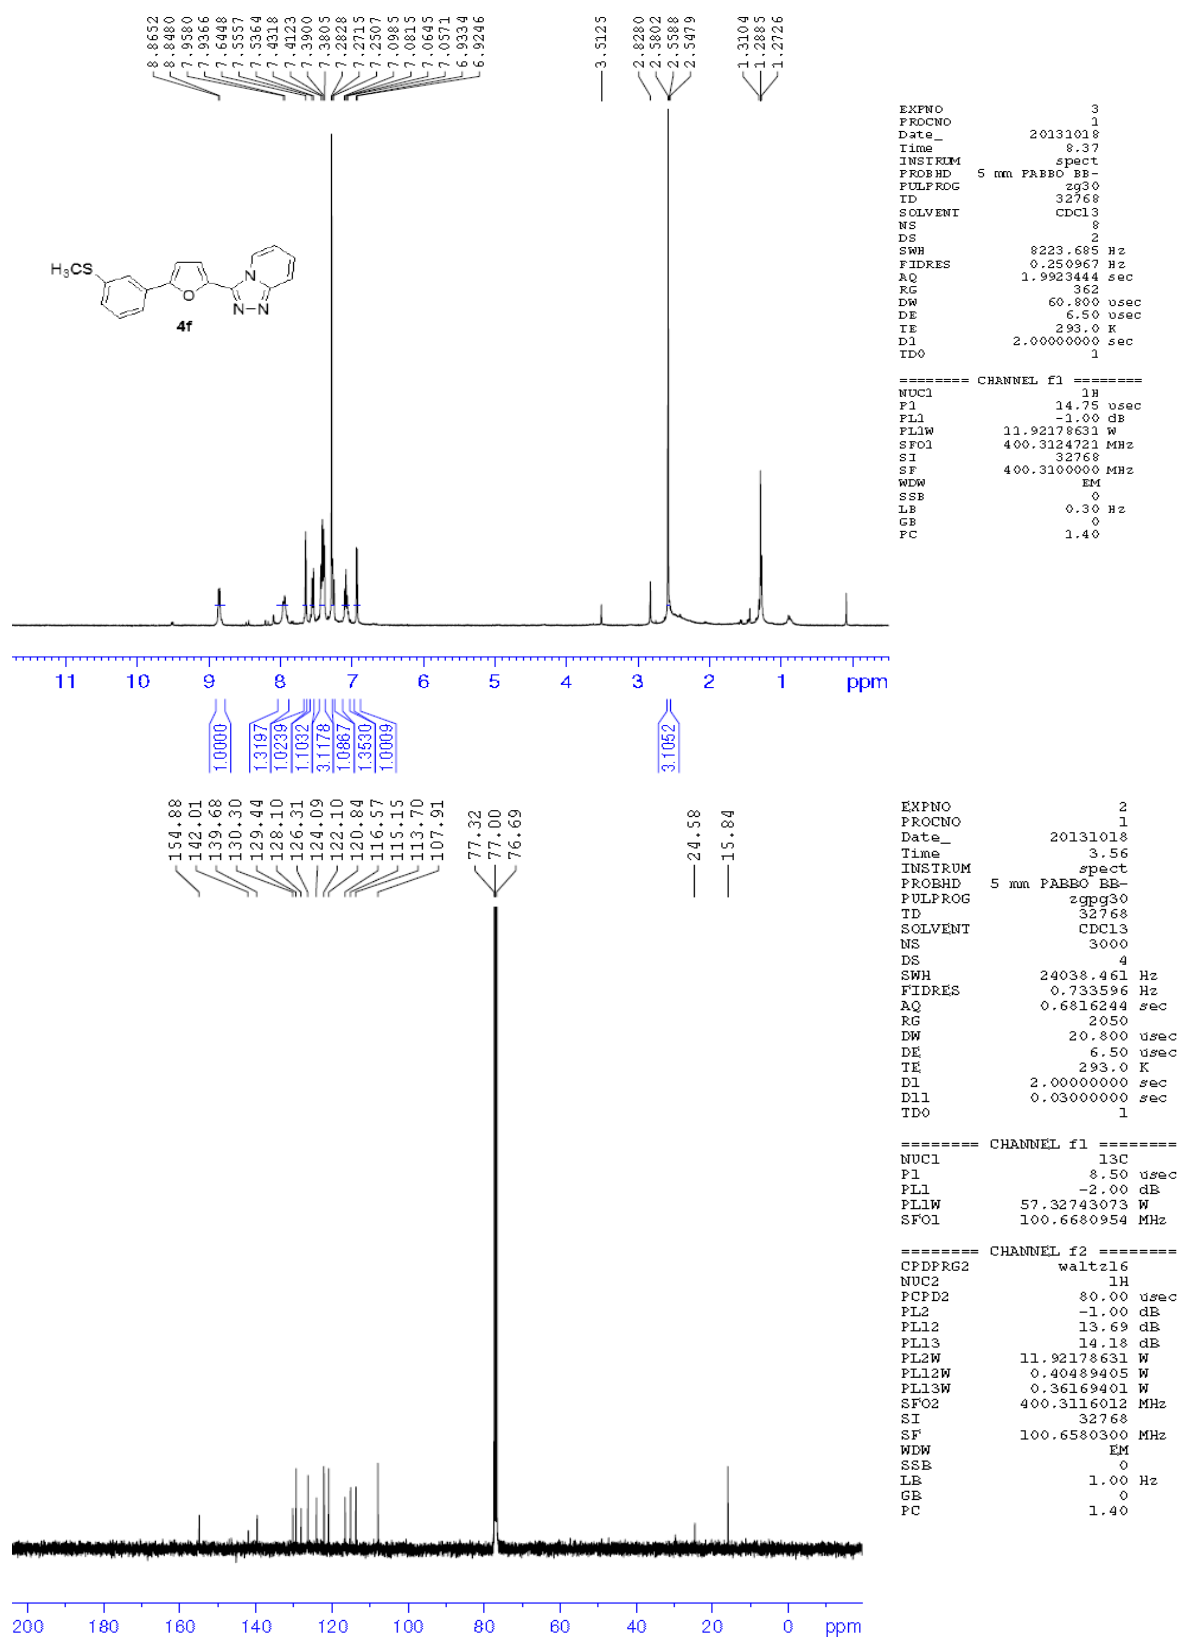

19. <sup>1</sup>H and <sup>13</sup>C NMR spectrum of 3-(5-(4-*tert*-Butylphenyl)thiophen-2-yl)-[1,2,4]triazolo[3,4-*a*]isoquinoline

(5a)

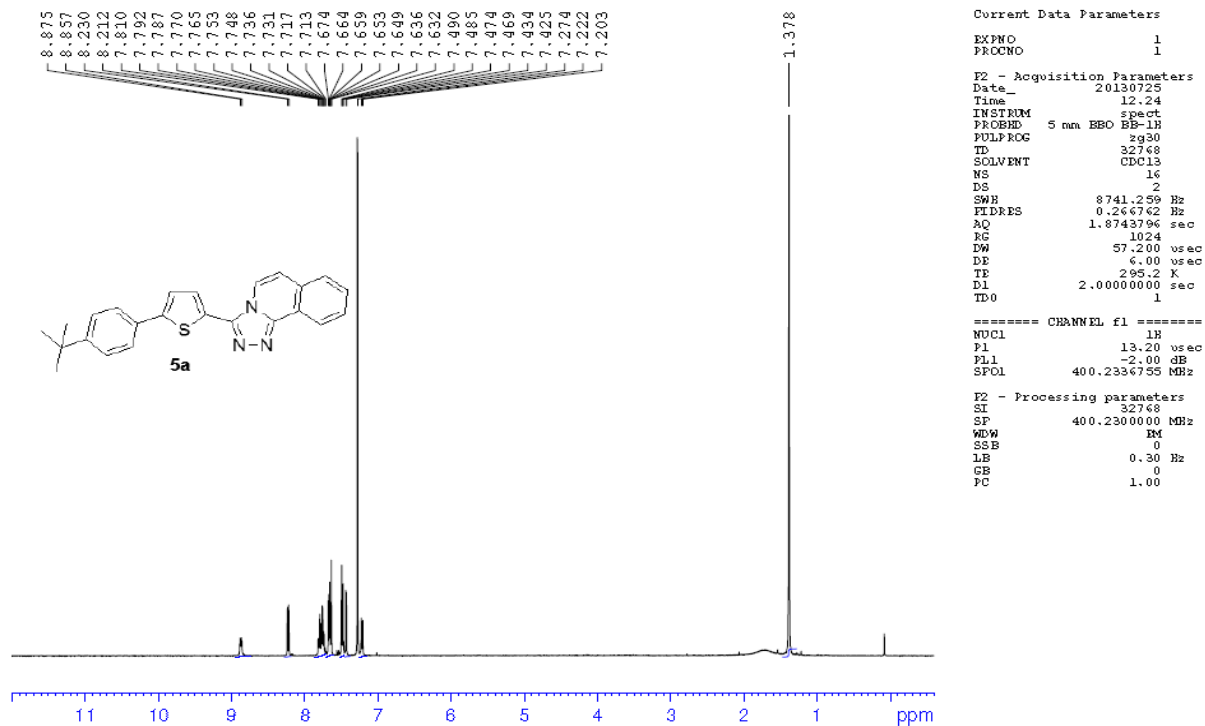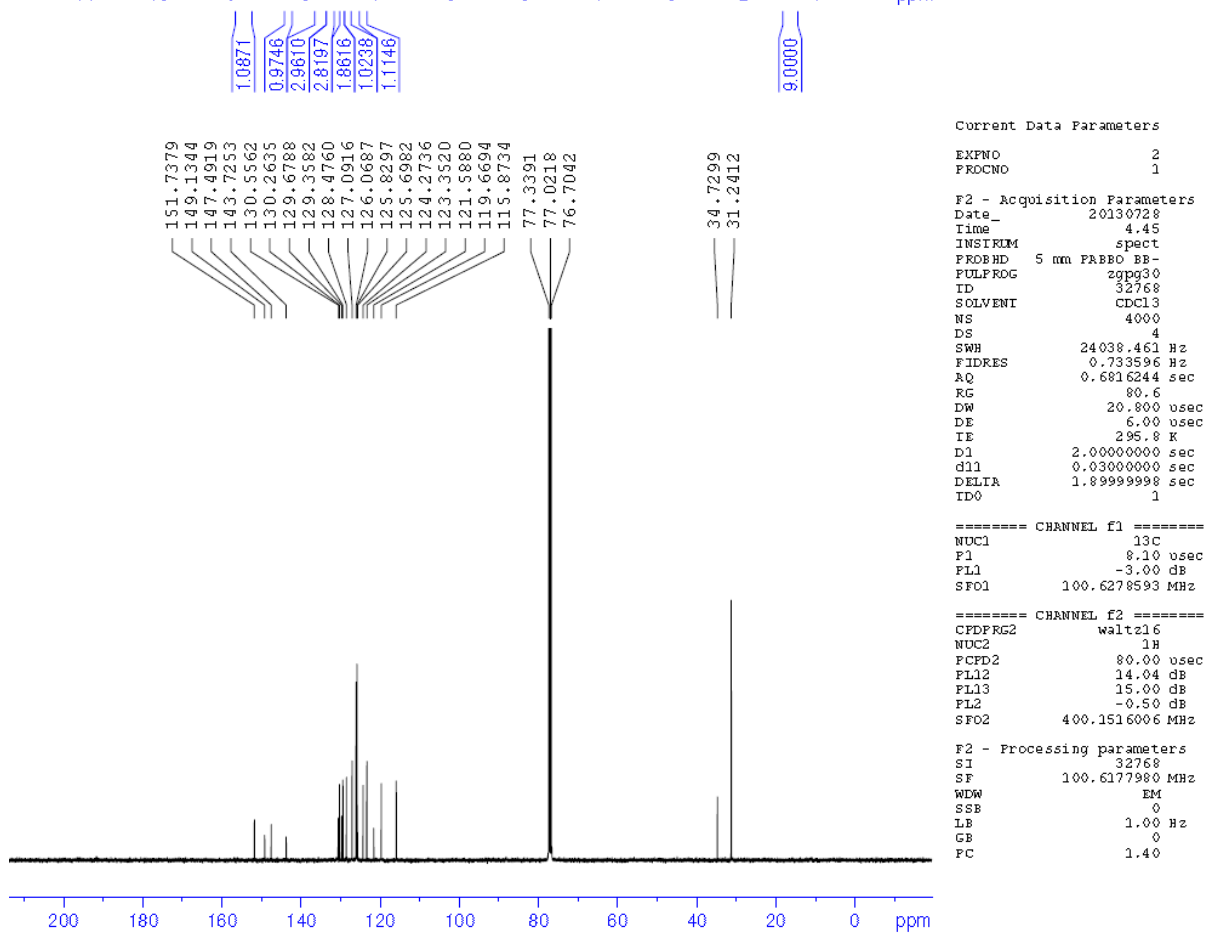

20. <sup>1</sup>H and <sup>13</sup>C NMR spectrum of 3-(5-(3-Methoxyphenyl)thiophen-2-yl)-[1,2,4]triazolo[3,4-a]isoquinoline (5b)

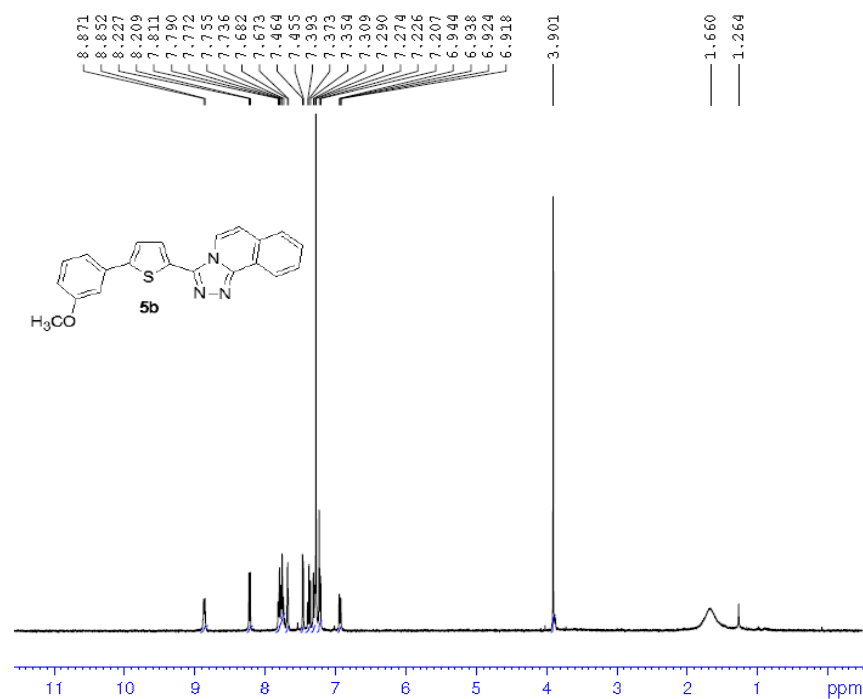

```
Current Data Parameters
EXPNO      1
PROCNO     1
F2 - Acquisition Parameters
Date_      20130905
Time       17.14
INSTRUM    spect
PROBHD     5 mm BBO BB-1H
PULPROG    zg30
TD          32768
SOLVENT    CDCl3
NS          16
DS          2
SWH         8223.685 Hz
FIDRES     0.250967 Hz
AQ          1.9923444 sec
RG          1149.4
DE          60.800 usec
TE          294.9 K
D1          2.00000000 sec
TD0         1
===== CHANNEL f1 =====
NUC1        1H
P1          13.20 usec
PL1         -2.00 dB
SFO1        400.2324715 MHz
F2 - Processing parameters
SI          32768
SF          400.2300000 MHz
WDW         EM
SSB         0
LB          0.30 Hz
GB          0
PC          1.00
```

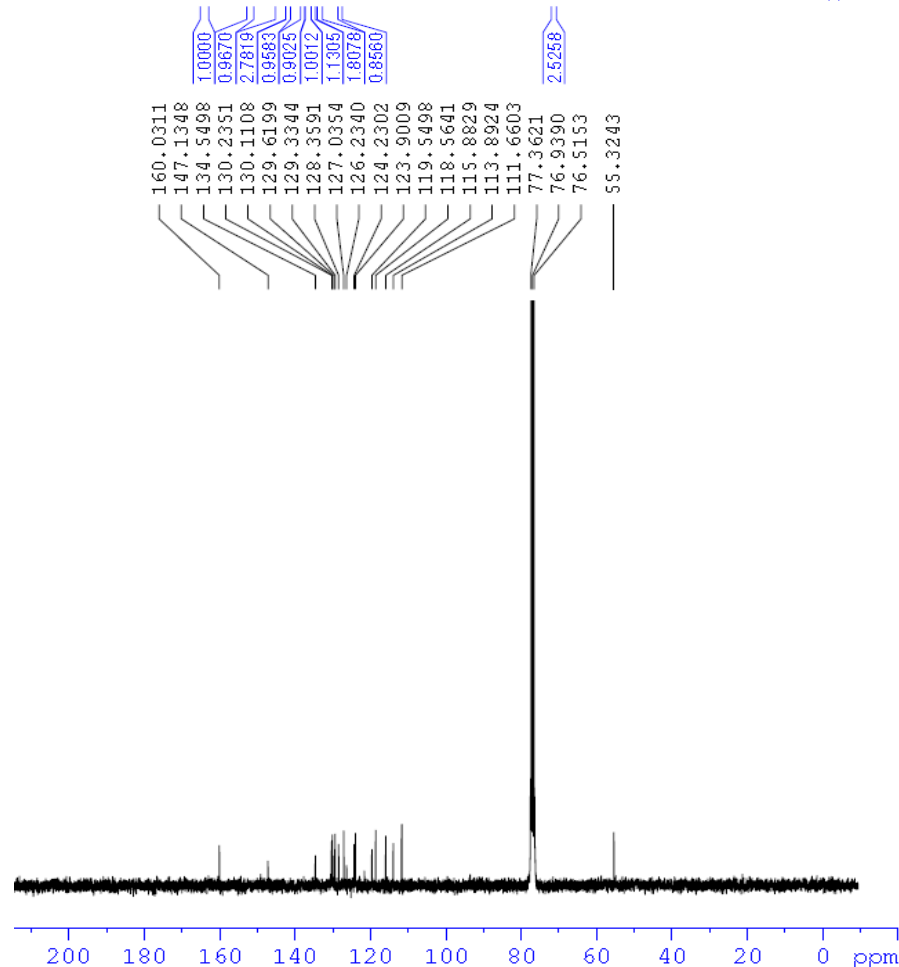

```
Current Data Parameters
EXPNO      5
PROCNO     1
F2 - Acquisition Parameters
Date_      20130911
Time       1.26
INSTRUM    spect
PROBHD     5 mm DUL BB-1H
PULPROG    zgpg30
TD          32768
SOLVENT    CDCl3
NS          3000
DS          0
SWH         20325.203 Hz
FIDRES     0.620276 Hz
AQ          0.8061428 sec
RG          10321.3
DE          24.600 usec
TE          6.00 usec
IE          0.0 K
D1          2.00000000 sec
d11         0.03000000 sec
DELTA      1.89999998 sec
MCRESTI    0.00000000 sec
MCWRK      0.01500000 sec
===== CHANNEL f1 =====
NUC1        13C
P1          8.50 usec
PL1         0.00 dB
SFO1        75.4771525 MHz
===== CHANNEL f2 =====
CPDPRG2    waltz16
NUC2        1H
PCPD2       80.00 usec
PL2         0.00 dB
PL12        14.75 dB
PL13        18.00 dB
SFO2        300.1315007 MHz
F2 - Processing parameters
SI          32768
SF          75.4677079 MHz
WDW         EM
SSB         0
LB          1.00 Hz
GB          0
PC          1.70
```

21. <sup>1</sup>H and <sup>13</sup>C NMR spectrum of 3-(5-Mesitylthiophen-2-yl)-[1,2,4]triazolo[3,4-a]isoquinoline (5c)

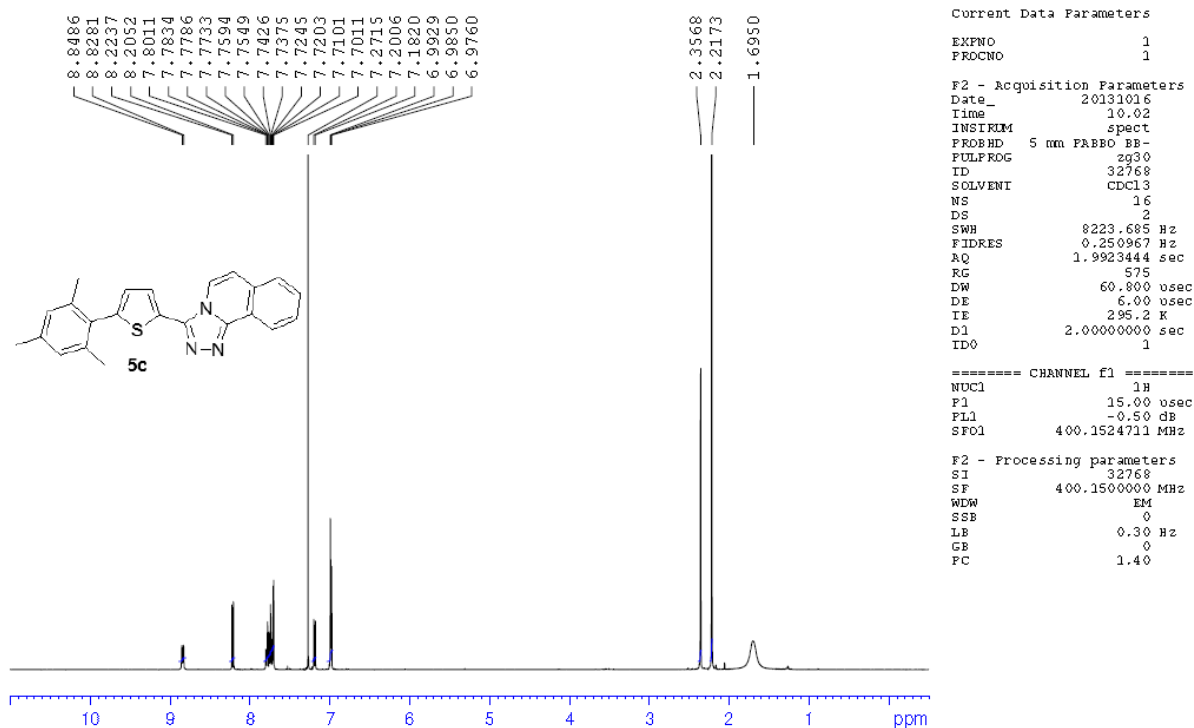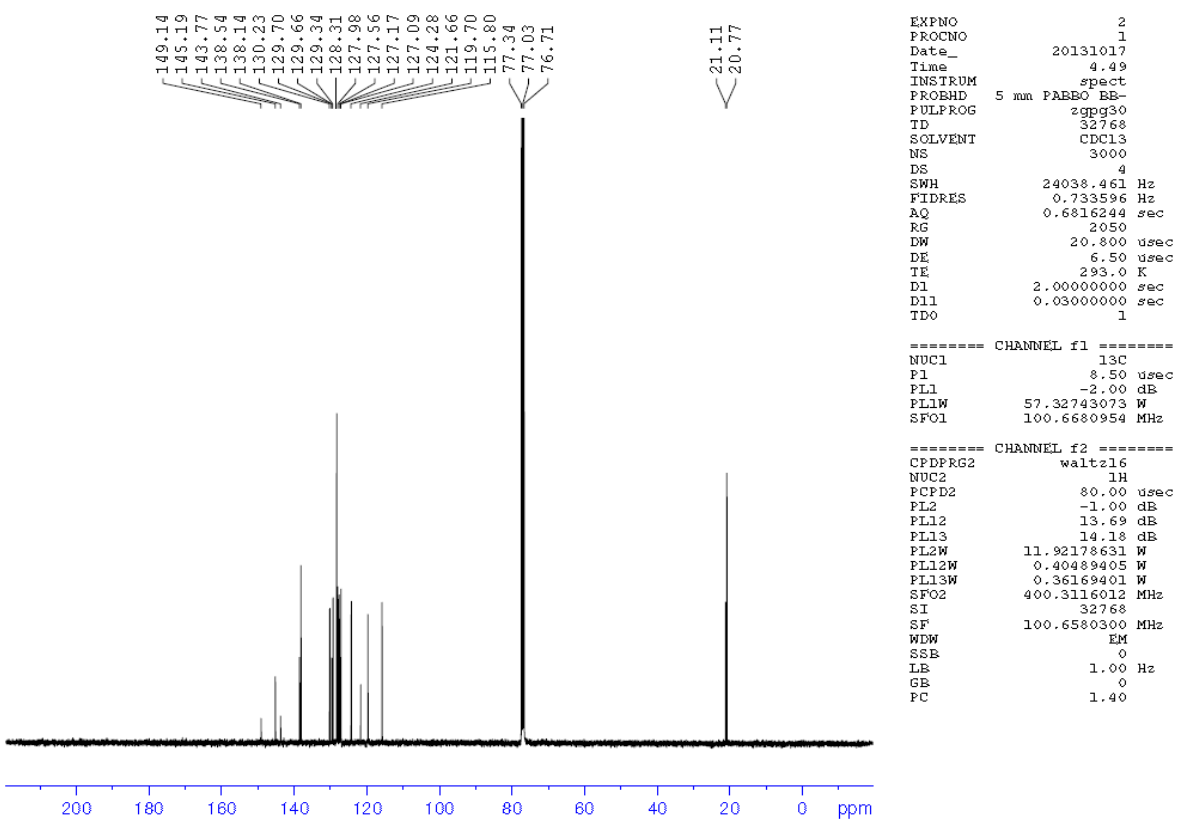

22. <sup>1</sup>H and <sup>13</sup>C NMR spectrum of 2-(5-Mesitylthiophen-2-yl)pyridine (6a)

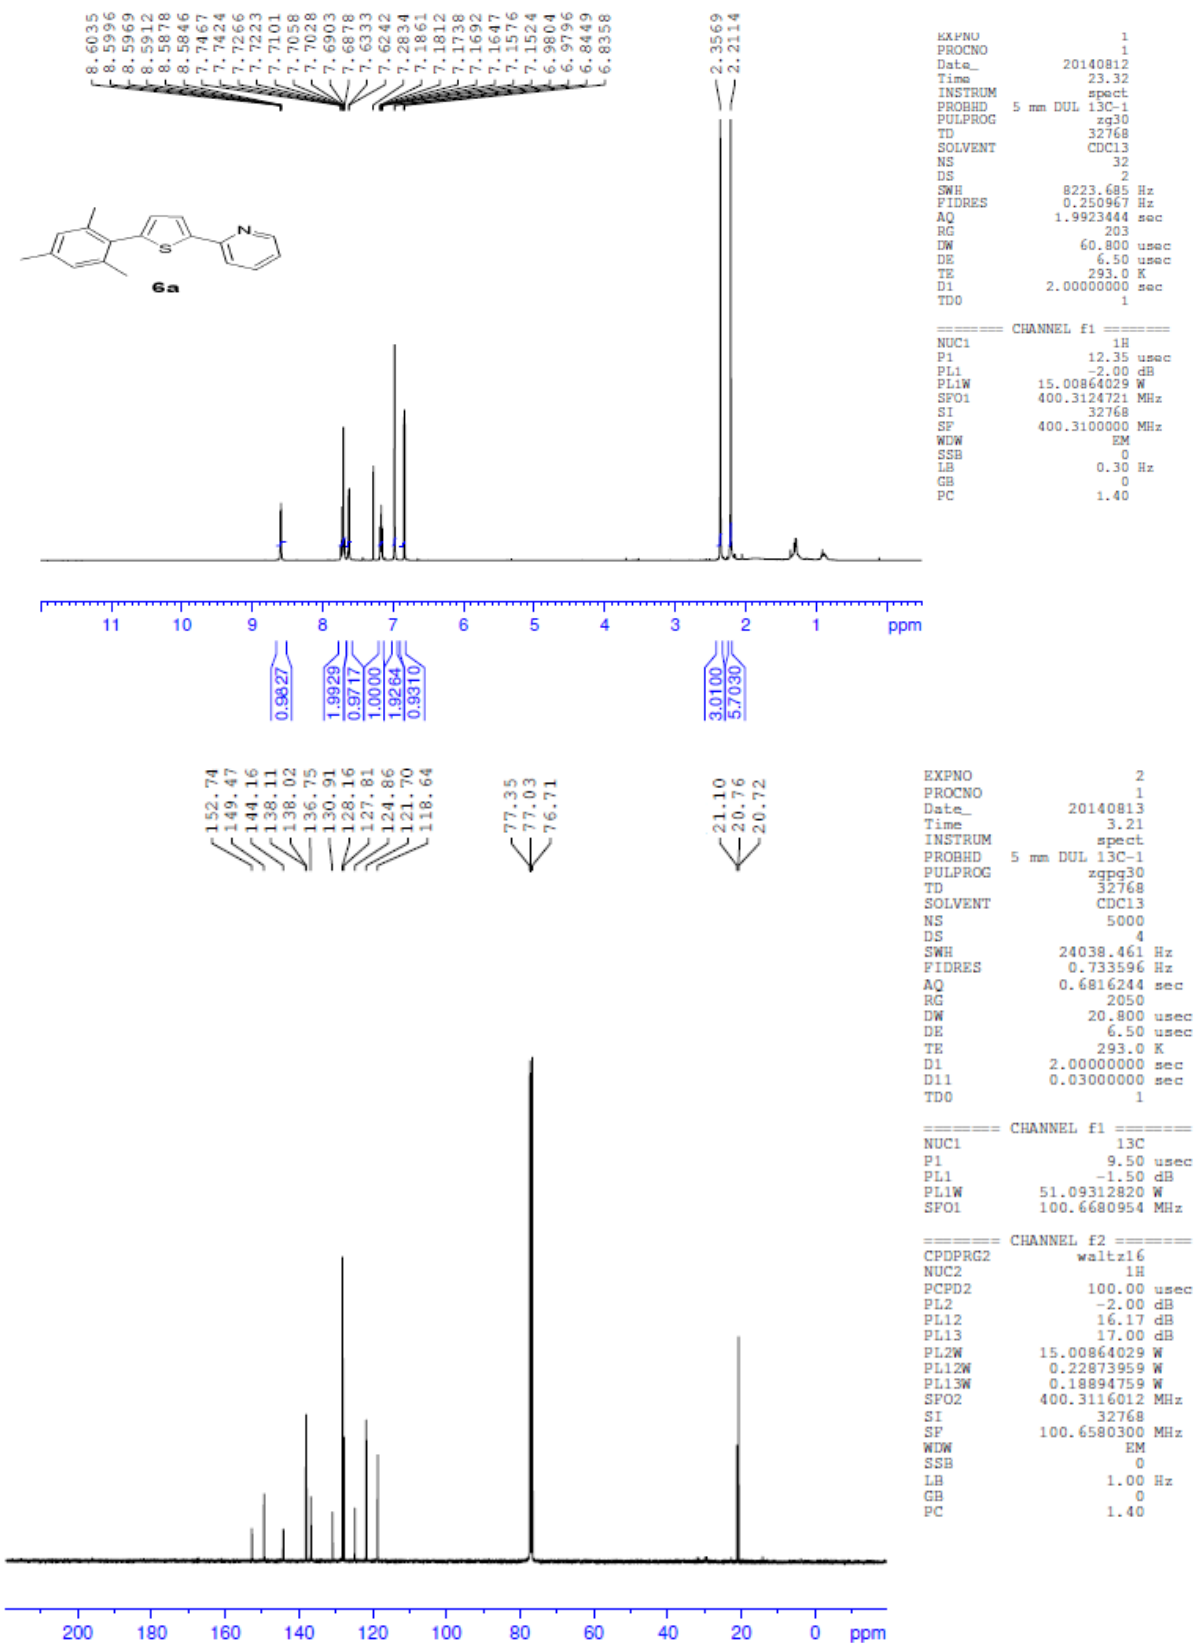

23. <sup>1</sup>H spectrum of 1-(5-Mesitylthiophen-2-yl)-1H-pyrazole (6b)

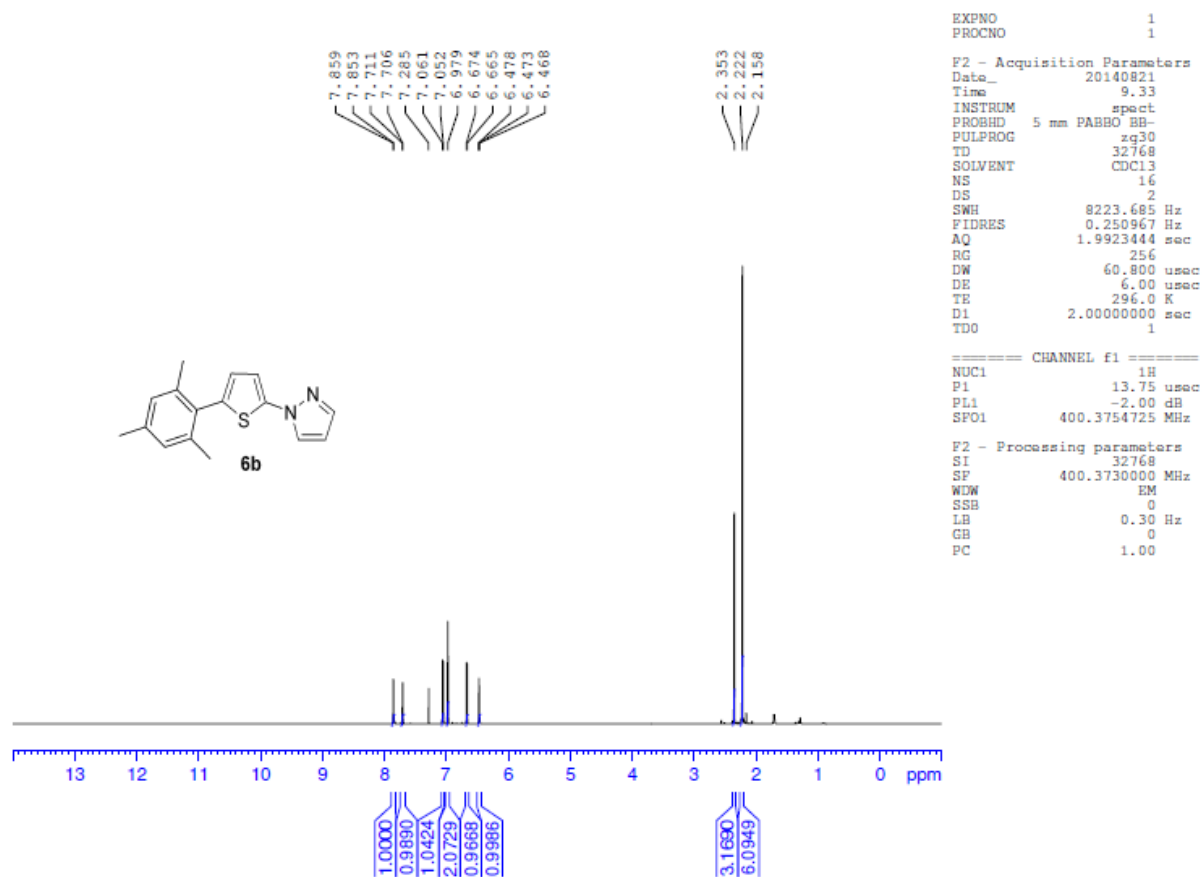

24. <sup>1</sup>H and <sup>13</sup>C NMR spectrum of 2-(5-Mesitylthiophen-2-yl)benzo[d]oxazole (6c)



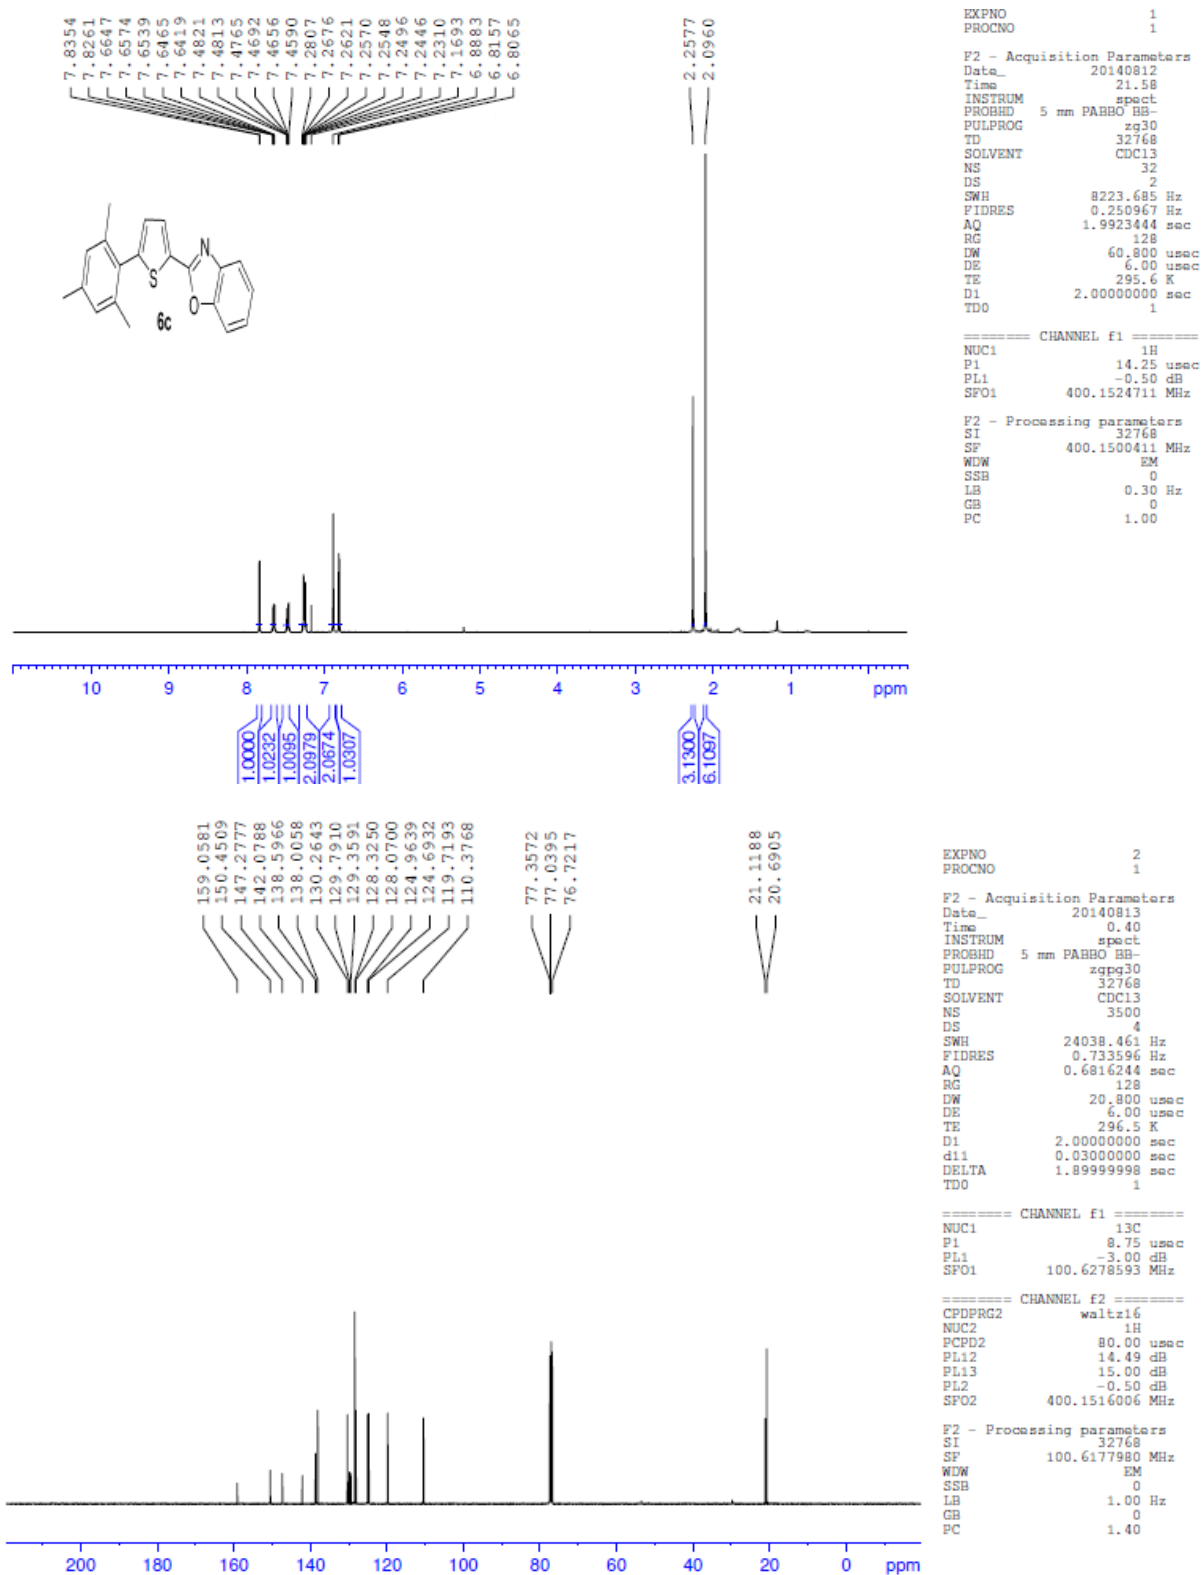

25. <sup>1</sup>H and <sup>13</sup>C NMR spectrum of 2-(5-Mesitylfuran-2-yl)benzo[d]oxazole (6d)

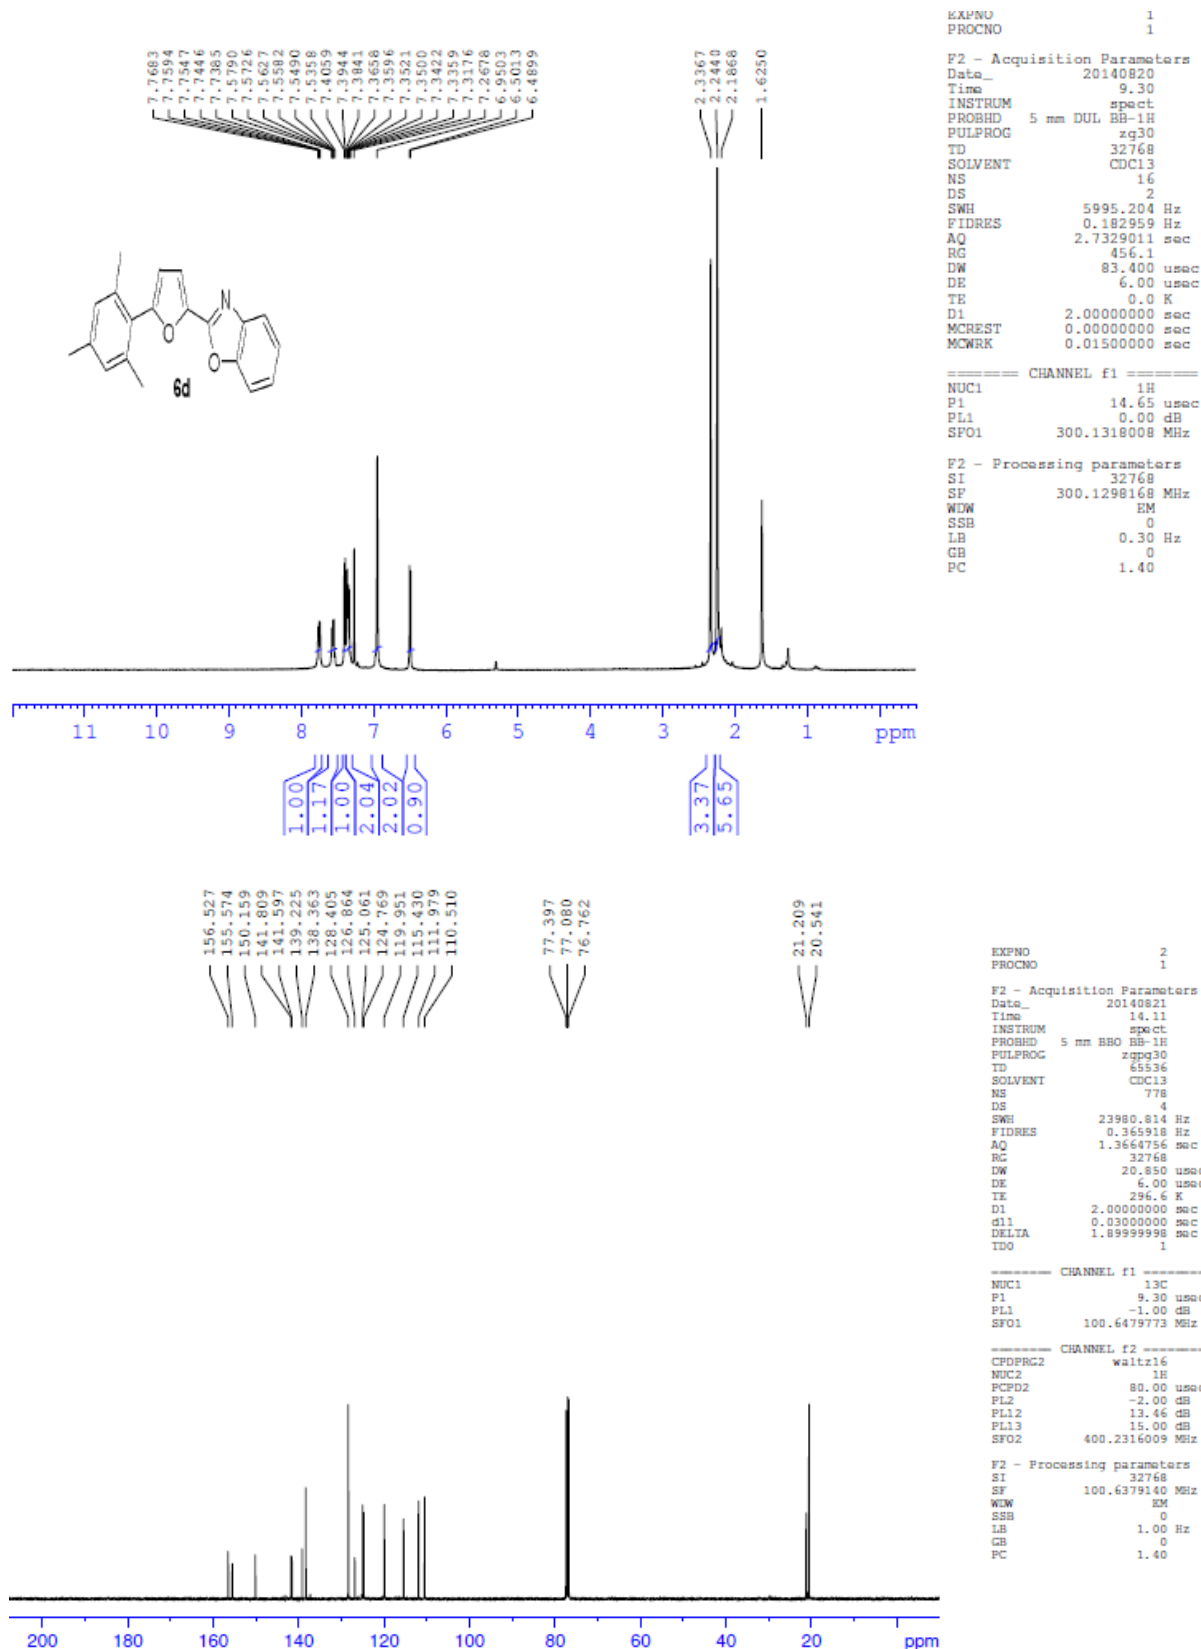

26. <sup>1</sup>H and <sup>13</sup>C NMR spectrum of 2-(5-Mesitylthiophen-2-yl)benzo[d]thiazole (6c)

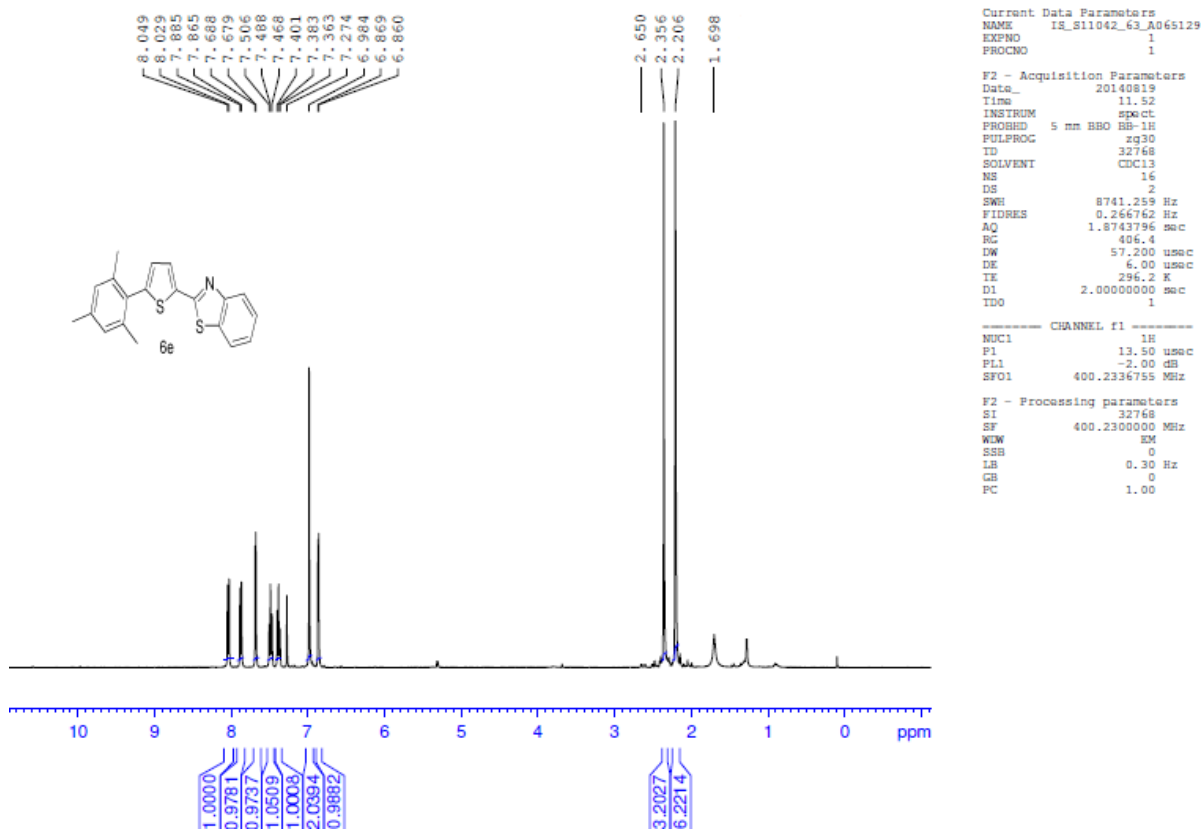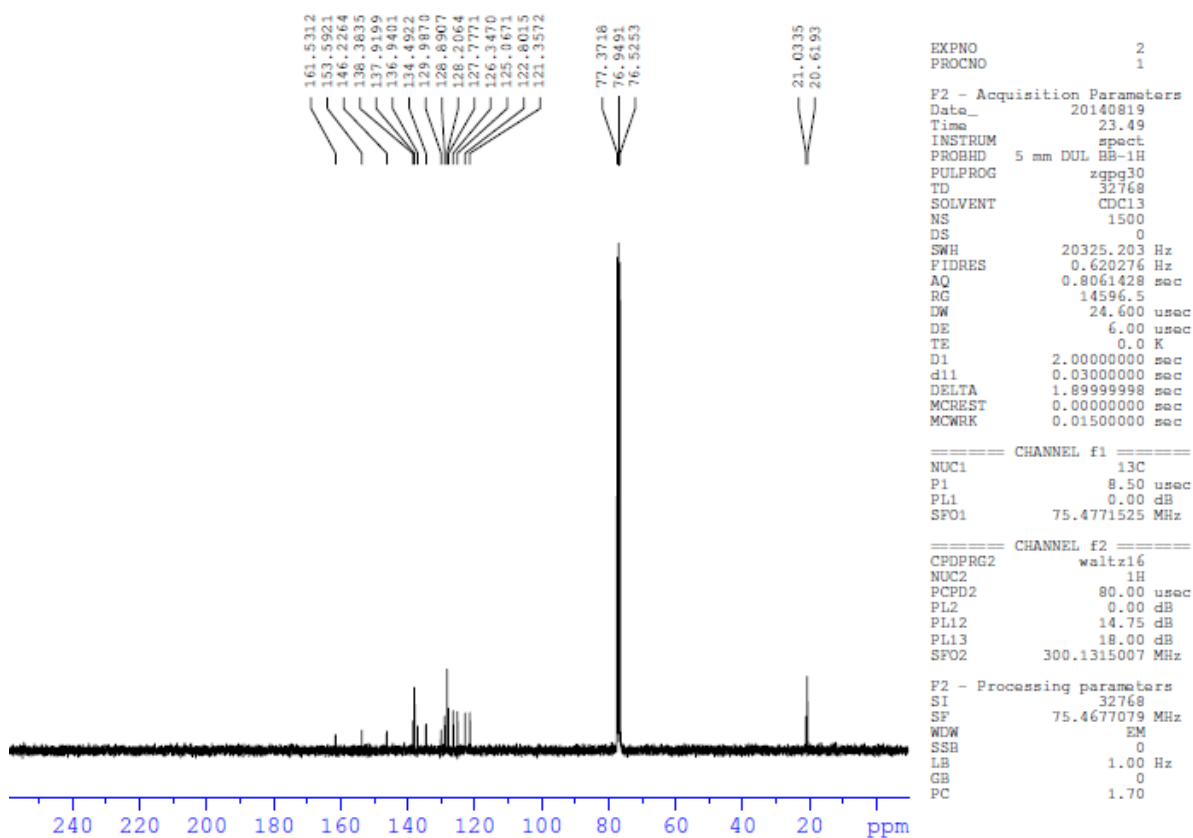

27. <sup>1</sup>H and <sup>13</sup>C NMR spectrum of 2-(5-Mesitylfuran-2-yl)benzo[d]thiazole (6f)

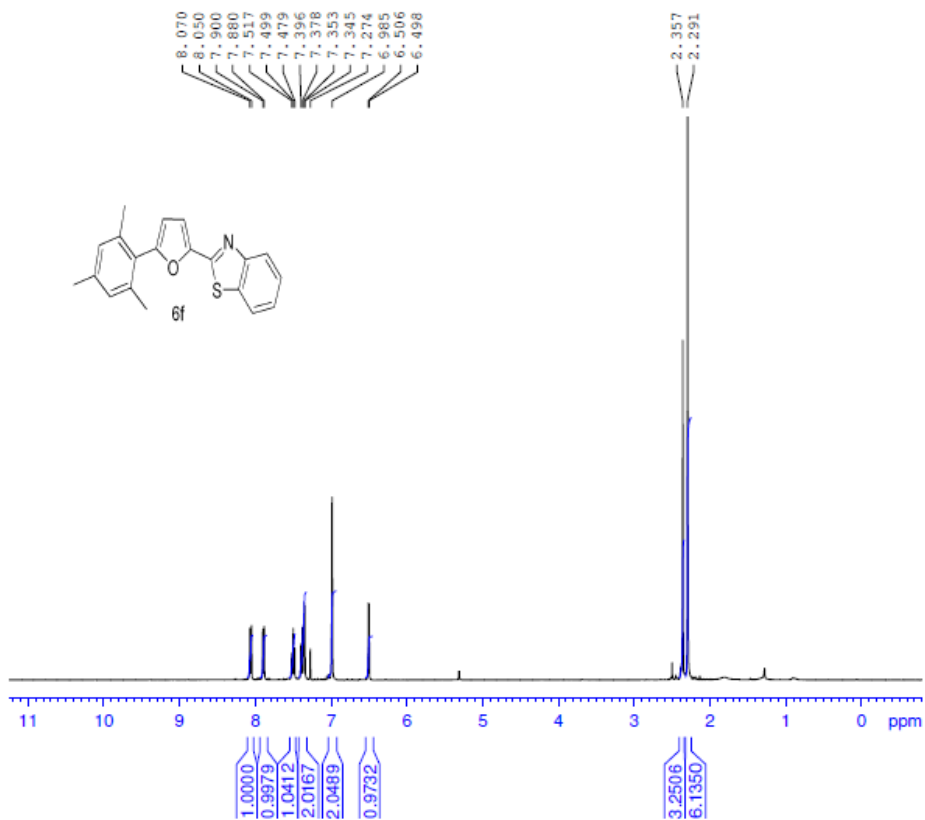

```

EXPNO          1
PROCNO         1

F2 - Acquisition Parameters
Date_          20140820
Time           10.24
INSTRUM       spect
PROBHD        5 mm BBO BB-1H
PULPROG       zg30
TD            32768
SOLVENT       CDCl3
NS            8
DS            2
SWH           8741.259 Hz
FIDRES        0.266762 Hz
AQ           1.8743796 sec
RG           322.5
DW           57.200 usec
DE            6.00 usec
TE            296.2 K
D1           2.0000000 sec
TD0           1

===== CHANNEL f1 =====
NUC1           1H
P1            13.50 usec
PL1           -2.00 dB
SFO1          400.2336755 MHz

F2 - Processing parameters
SI            32768
SF           400.2300000 MHz
WMW           EM
SSB           0
LB            0.30 Hz
GB            0
PC            1.00

```

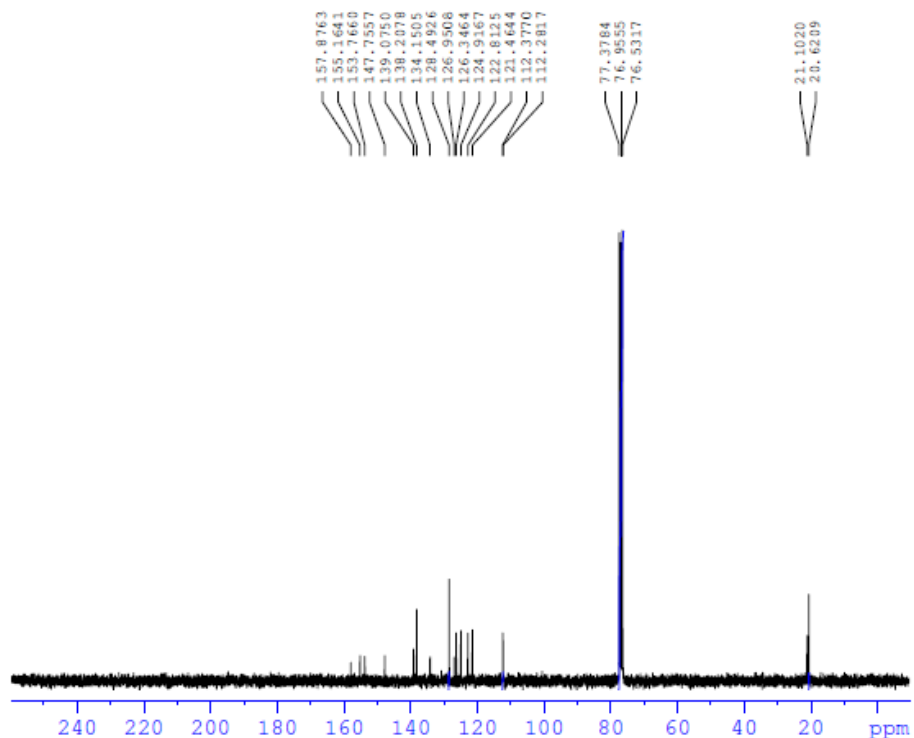

```

EXPNO          2
PROCNO         1

F2 - Acquisition Parameters
Date_          20140820
Time           22.35
INSTRUM       spect
PROBHD        5 mm DUL BB-1H
PULPROG       zpgq30
TD            32768
SOLVENT       CDCl3
NS            0
DS            0
SWH           20325.203 Hz
FIDRES        0.620276 Hz
AQ           0.8061428 sec
RG           5792.6
DW           24.600 usec
DE            6.00 usec
TE            0.0 K
D1           2.0000000 sec
d11           0.0300000 sec
DELTA         1.899999998 sec
MCREST        0.0000000 sec
MCWRK         0.0150000 sec

===== CHANNEL f1 =====
NUC1           13C
P1            8.50 usec
PL1            0.00 dB
SFO1          75.4771525 MHz

===== CHANNEL f2 =====
CPDPRG2       waltz16
NUC2           1H
PCPD2         80.00 usec
PL2            0.00 dB
PL12          14.75 dB
PL13          18.00 dB
SPO2          300.1315007 MHz

F2 - Processing parameters
SI            32768
SF           75.4677079 MHz
WDW           EM
SSB           0
LB            1.00 Hz
GB            0
PC            1.70

```

28. <sup>1</sup>H and <sup>13</sup>C NMR spectrum of 2-Mesityl-5-(4-methoxyphenyl)thiophene (6g)

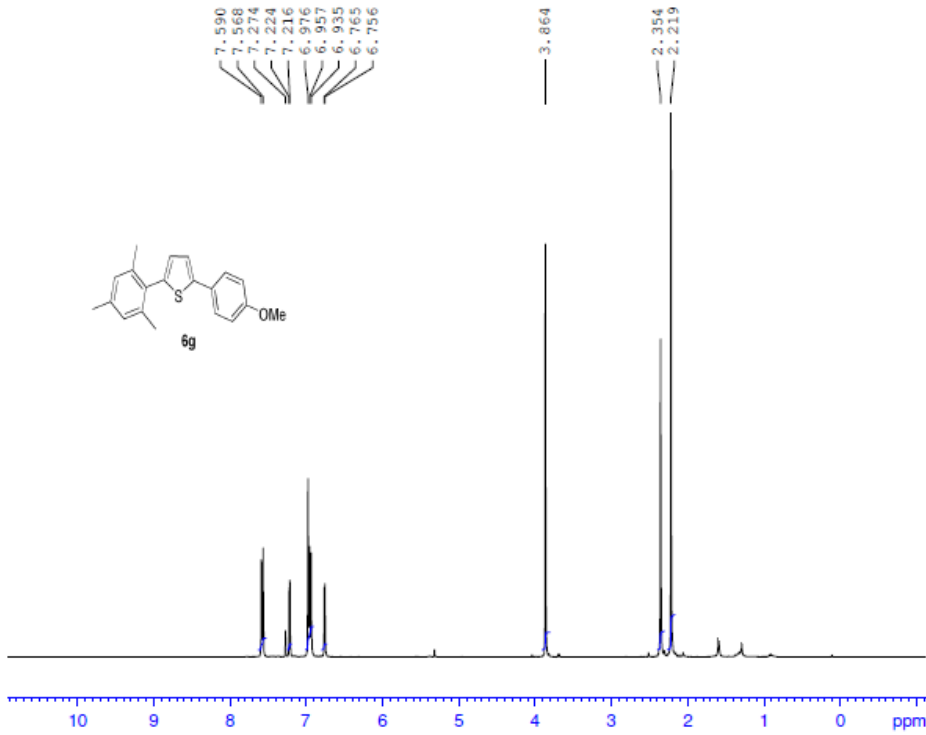

```

EXPNO          1
PROCNO         1
F2 - Acquisition Parameters
Date_          20140819
Time          11.41
INSTRUM       spect
PROBHD        5 mm BBO BB-1H
PULPROG       zg30
ID            32768
SOLVENT       CDCl3
NS            16
DS            2
SWH           8741.259 Hz
FIDRES        0.266762 Hz
AQ            1.8743796 sec
RG            256
DW            57.200 usec
DE            6.00 usec
TE            296.2 K
D1            2.0000000 sec
TD0           1

----- CHANNEL f1 -----
NUC1           1H
P1             13.50 usec
PL1            -2.00 dB
SFO1          400.2336755 MHz

F2 - Processing parameters
SI            32768
SF           400.2300000 MHz
WDW           EM
SSB           0
LB            0.30 Hz
GB            0
PC            1.00

```

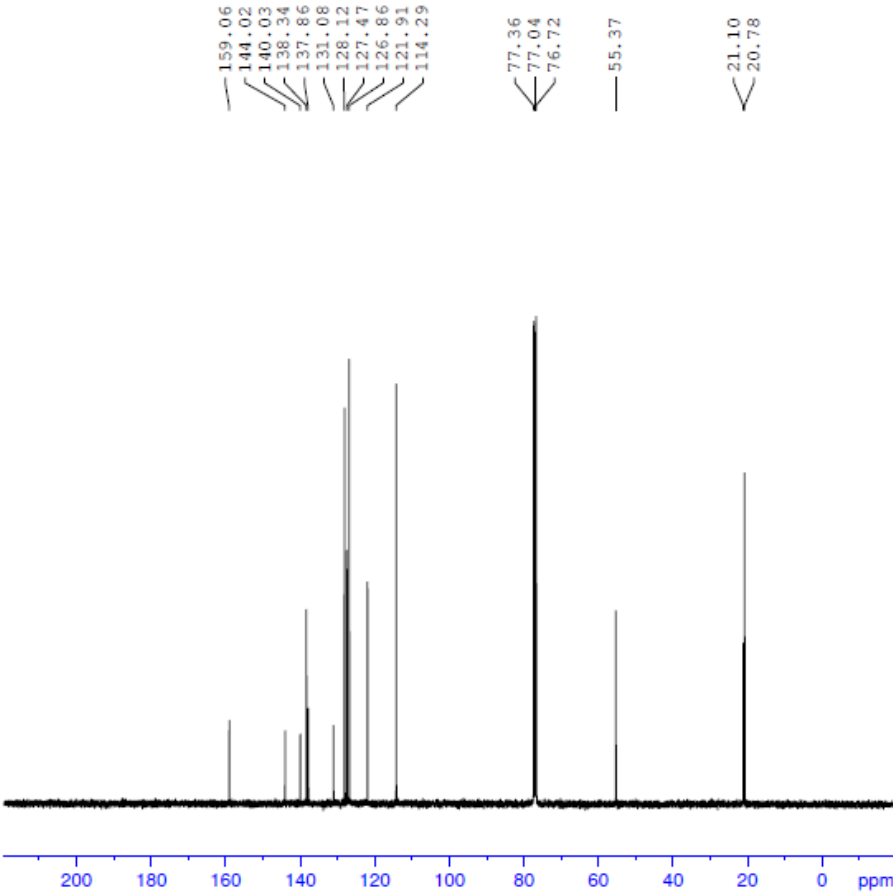

```

EXPNO          2
PROCNO         1
Date_          20140820
Time           6.38
INSTRUM       spect
PROBHD        5 mm DUL 13C-1
PULPROG       zgpg30
ID            32768
SOLVENT       CDCl3
NS            1024
DS            4
SWH           24038.461 Hz
FIDRES        0.733596 Hz
AQ            0.6816244 sec
RG            2050
DW            20.800 usec
DE            6.50 usec
TE            293.0 K
D1            2.0000000 sec
D11           0.0300000 sec
TD0           1

----- CHANNEL f1 -----
NUC1           13C
P1             9.50 usec
PL1            -1.50 dB
PL1W          51.09312820 W
SFO1          100.6680954 MHz

----- CHANNEL f2 -----
CPDPRG2       waltz16
NUC2           1H
PCPD2         100.00 usec
PL2            -2.00 dB
PL12          16.17 dB
PL13          17.00 dB
PL2W          15.00864029 W
PL12W         0.22873959 W
PL13W         0.18894759 W
SFO2          400.3116012 MHz
SI            32768
SF           100.6580300 MHz
WDW           EM
SSB           0
LB            1.00 Hz
GB            0
PC            1.40

```

29. <sup>1</sup>H and <sup>13</sup>C NMR spectrum of 2-mesityl-5-methylfuran (6h)

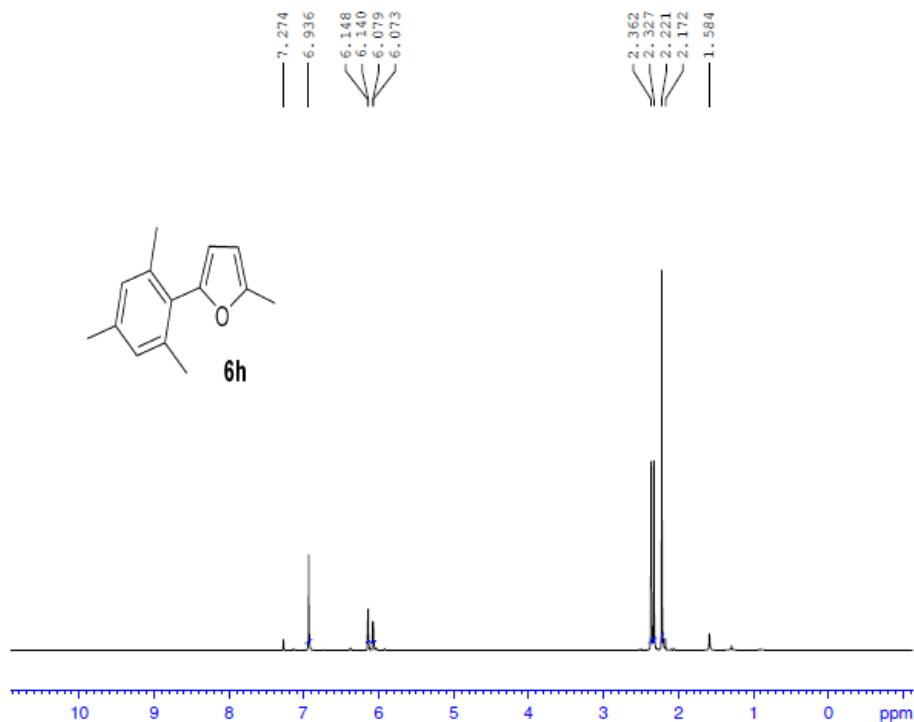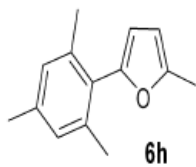

```

EXPNO          1
PROCNO         1
F2 - Acquisition Parameters
Date_          20140819
Time          11.44
INSTRUM       spect
PROBHD        5 mm BBO BB-1H
PULPROG       zg30
ID            32768
SOLVENT       CDCl3
NS            16
DS            2
SWH           8741.259 Hz
FIDRES        0.266762 Hz
AQ            1.8743796 sec
RG            256
DW            57.200 usec
DE            6.00 usec
TE            296.1 K
D1            2.00000000 sec
TD0           1

----- CHANNEL f1 -----
NUC1           1H
P1             13.50 usec
PL1            -2.00 dB
SFO1           400.2336755 MHz

F2 - Processing parameters
SI             32768
SF             400.2300000 MHz
WDW            EM
SSB            0
LB             0.30 Hz
GB             0
PC             1.00
  
```

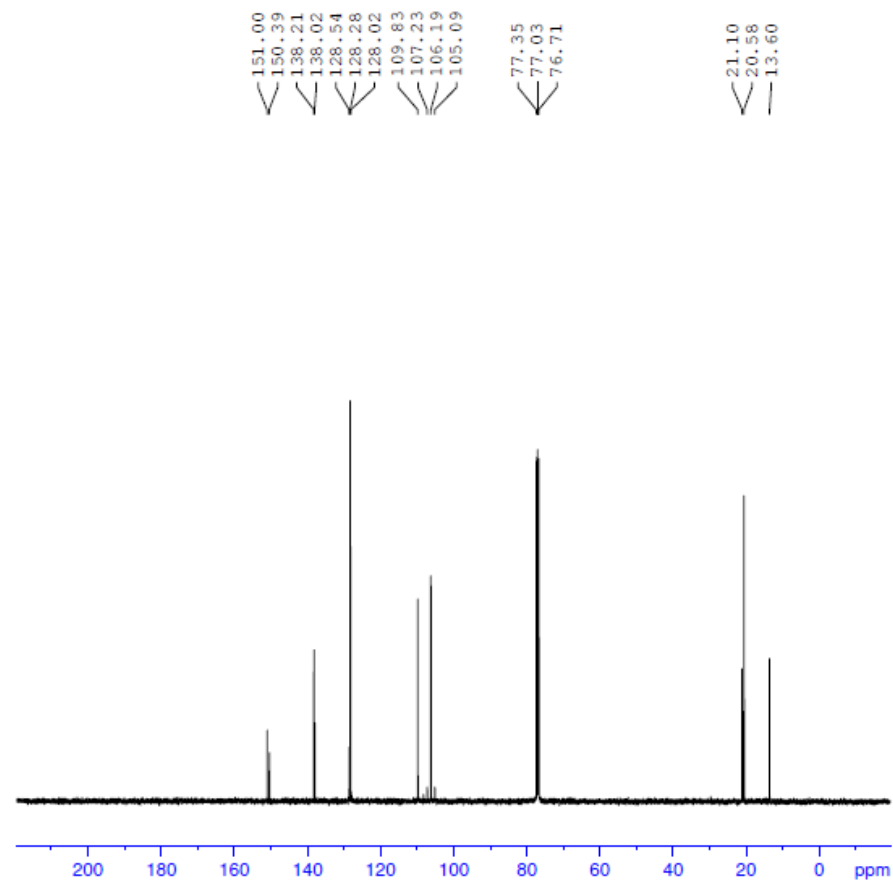

```

EXPNO          2
PROCNO         1
Date_          20140820
Time           5.47
INSTRUM       spect
PROBHD        5 mm DUL 13C-1
PULPROG       zgpg30
ID            32768
SOLVENT       CDCl3
NS            1024
DS            4
SWH           24038.461 Hz
FIDRES        0.733596 Hz
AQ            0.6816244 sec
RG            2050
DW            20.800 usec
DE            6.50 usec
TE            293.0 K
D1            2.00000000 sec
D11           0.03000000 sec
TD0           1

----- CHANNEL f1 -----
NUC1           13C
P1             9.50 usec
PL1            -1.50 dB
PL1W           51.09312820 W
SFO1           100.6680954 MHz

----- CHANNEL f2 -----
CPDPRG2       waltz16
NUC2           1H
PCPD2         100.00 usec
PL2            -2.00 dB
PL12          16.17 dB
PL13          17.00 dB
PL2W          15.00864029 W
PL12W         0.22873959 W
PL13W         0.18894759 W
SFO2           400.3116012 MHz
SI             32768
SF             100.6580300 MHz
WDW            EM
SSB            0
LB             1.00 Hz
GB             0
PC             1.40
  
```
